# Supplementary material for: Photosensitizer-free synthesis of β-keto sulfones via visible-light-induced oxysulfonylation of alkenes with sulfonic acids
Source: Royal Society of Chemistry journal article supplement (doi:10.1039/d1ob00552a), 2021-01-01
Supplement: d1ob00552a1.pdf [file d1ob00552a1.pdf]

## **Photosensitizer-Free Synthesis of $\beta$ -Keto Sulfones via Visible-Light-Induced Oxysulfonylation of Alkenes with Sulfonic Acids**

Zhen Peng<sup>a</sup>, Yun-Yun Hong<sup>a</sup>, Sha Peng<sup>a</sup>, Xiang-Qun Xu<sup>a</sup>, Shan-Shan Tang<sup>a</sup>, Li-Hua Yang<sup>a</sup> and Long-Yong Xie<sup>a\*</sup>

<sup>a</sup>College of Chemistry and Bioengineering, Hunan University of Science and Engineering, Yongzhou 425100, China

E-mail: longyongxie@yeah.net

### **Table of Content**

|                                                                    |            |
|--------------------------------------------------------------------|------------|
| <b>1. General information</b>                                      | <b>S2</b>  |
| <b>2. Experimental Section</b>                                     | <b>S2</b>  |
| <b>3. Characterization data of products</b>                        | <b>S3</b>  |
| <b>4. References</b>                                               | <b>S10</b> |
| <b>5. <sup>1</sup>H and <sup>13</sup>C NMR spectra of products</b> | <b>S11</b> |

## 1. General information

Unless otherwise specified, all reagents and solvents were obtained from commercial suppliers and used without further purification. All reagents were weighed and handled in air at room temperature.  $^1\text{H}$  NMR spectra were recorded at 400 MHz and  $^{13}\text{C}$  NMR spectra were recorded at 100 MHz by using a Bruker Avance 400 spectrometer. Chemical shifts were calibrated using residual undeuterated solvent as an internal reference ( $^1\text{H}$  NMR:  $\text{CDCl}_3$  7.26 ppm,  $^{13}\text{C}$  NMR:  $\text{CDCl}_3$  77.0 ppm). The following abbreviations were used to describe peak splitting patterns when appropriate: s = singlet, d = doublet, t = triplet, q = quartet, m = multiplet, brs = broad singlet. Mass spectra were performed on a spectrometer operating on ESI-TOF. There is about 2.0 cm distance between the reactor and LEDs.

## 2. Experimental Section

### General procedure for the preparation of $\beta$ -Keto Sulfones

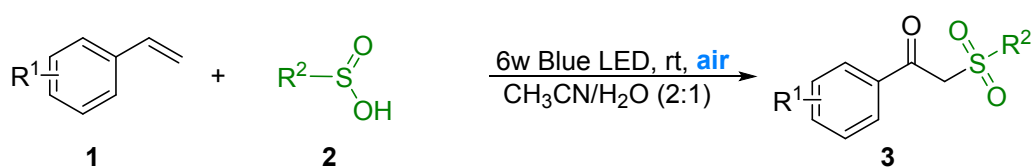

In a mixed solvent of  $\text{CH}_3\text{CN}$  and  $\text{H}_2\text{O}$  (1.8 mL,  $V_{\text{CH}_3\text{CN}}:V_{\text{H}_2\text{O}} = 2:1$ ) was added alkenes **1** (0.3 mmol) and sulfonic Acids **2** (0.6 mmol). The reaction mixture was open to the air and stirred at room temperature under the irradiation of 6W blue LED lamps (440 – 445 nm) for 12 – 24 h. the reaction was monitored by TLC. After completion of the reaction, the resulting mixture was extracted with EtOAc (5 mL  $\times$  3) and the organic phase was then removed under vacuum. The residue was purified by flash column chromatography using a mixture of petroleum ether and ethyl acetate as eluent to give the desired products  $\beta$ -Keto Sulfones **3**.

### Gram-scale synthesis of **3aa**

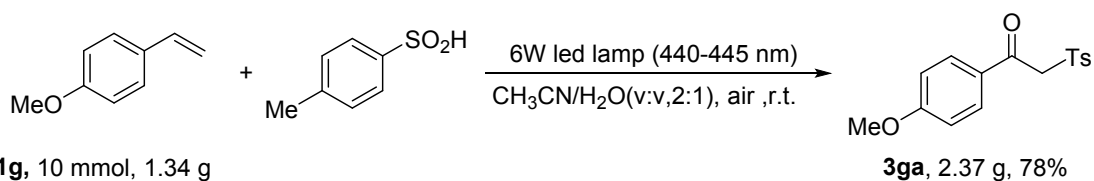

In a mixed solvent of  $\text{CH}_3\text{CN}$  and  $\text{H}_2\text{O}$  (60 mL,  $V_{\text{CH}_3\text{CN}}:V_{\text{H}_2\text{O}} = 2:1$ ) was added 1-methoxy-4-vinylbenzene **1g** (1.34 g, 10 mmol) and 4-methylbenzenesulfonic acid (3.12 g, 20 mmol). The reaction mixture was open to the air and stirred at room temperature under the irradiation of 6W blue LED lamps for 24h. After completion of the reaction, the resulting mixture was extracted with EtOAc (30 mL  $\times$  3) and the organic phase was then removed under vacuum. The residue was purified by flash column chromatography using a mixture of petroleum ether and ethyl acetate as eluent to give 2.37 gram of **3ga**, yield 78%.

### 3. Characterization data of products

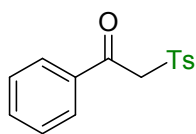

**phenyl-2-tosylethan-1-one (3aa)<sup>1</sup>**: White solid; 66.6 mg (isolated yield 81%); <sup>1</sup>H NMR (400 MHz, CDCl<sub>3</sub>) δ = 7.95 (d, *J* = 8.0 Hz, 2 H), 7.76 (d, *J* = 8.0 Hz, 2 H), 7.62 (t, *J* = 8.0 Hz, 1 H), 7.48 (t, *J* = 8.0 Hz, 2 H), 7.33 (d, *J* = 8.4 Hz, 2 H), 4.72 (s, 2 H), 2.44 (s, 3 H); <sup>13</sup>C NMR (100 MHz, CDCl<sub>3</sub>) δ = 188.1, 145.4, 135.7, 135.6, 134.3, 129.8, 129.3, 128.8, 128.6, 63.5, 21.7.

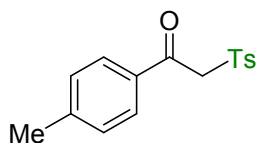

**1-(p-tolyl)-2-tosylethan-1-one (3ba)<sup>2</sup>**: White solid; 71.7 mg (isolated yield 83%); <sup>1</sup>H NMR (400 MHz, CDCl<sub>3</sub>) δ = 7.78 (d, *J* = 8.0 Hz, 2 H), 7.68 (d, *J* = 8.4 Hz, 2 H), 7.26 (d, *J* = 8.4 Hz, 2 H), 7.20 (d, *J* = 8.8 Hz, 2 H), 4.62 (s, 2 H), 2.37 (s, 3 H), 2.35 (s, 3 H); <sup>13</sup>C NMR (100 MHz, CDCl<sub>3</sub>) δ = 187.6, 145.5, 135.7, 133.3, 129.8, 129.5, 129.5, 128.6, 123.8, 63.5, 21.8, 21.7.

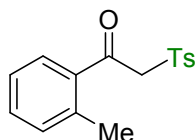

**1-(o-tolyl)-2-tosylethan-1-one (3ca)<sup>3</sup>**: White solid; 62.2 mg (isolated yield 72%); <sup>1</sup>H NMR (400 MHz, CDCl<sub>3</sub>) δ = 7.76 – 7.72 (m, 3 H), 7.43 (t, *J* = 7.2 Hz, 1 H), 7.33 (d, *J* = 8.0 Hz, 2 H), 7.30 – 7.24 (m, 2 H), 4.69 (s, 2 H), 2.44 (s, 3 H), 2.44 (s, 3 H); <sup>13</sup>C NMR (100 MHz, CDCl<sub>3</sub>) δ = 190.5, 145.2, 140.0, 135.9, 135.6, 132.7, 132.3, 130.4, 129.8, 128.5, 125.9, 65.5, 21.7, 21.5.

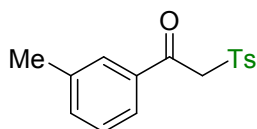

**1-(m-tolyl)-2-tosylethan-1-one (3da)<sup>4</sup>**: White solid; 65.6 mg (isolated yield 76%); <sup>1</sup>H NMR (400 MHz, CDCl<sub>3</sub>) δ = 7.77 – 7.71 (m, 4 H), 7.42 (d, *J* = 7.6 Hz, 1 H), 7.38 – 7.32 (m, 3 H), 4.70 (s, 2 H), 2.44 (s, 3 H), 2.39 (s, 3 H); <sup>13</sup>C NMR (100 MHz, CDCl<sub>3</sub>) δ = 188.3, 145.3, 138.7, 135.7, 135.7, 135.1, 129.8, 129.7, 128.7, 128.6, 126.6, 63.5, 21.7, 21.3.

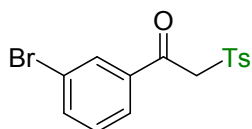

**1-(3-bromophenyl)-2-tosylethan-1-one (3ea)<sup>3</sup>**: White solid; 88.7 mg (isolated yield 84%); <sup>1</sup>H NMR (400 MHz, CDCl<sub>3</sub>) δ = 8.00 – 7.98 (m, 1 H), 7.89 (d, *J* = 8.0 Hz, 1 H), 7.75 – 7.72 (m, 3 H), 7.39 – 7.33 (m, 3 H), 4.68 (s, 2 H), 2.45 (s, 3 H); <sup>13</sup>C NMR (100 MHz, CDCl<sub>3</sub>) δ = 187.0, 145.6, 137.3, 137.1, 135.4, 132.0, 130.4, 129.9, 128.5, 128.0, 123.1, 63.6, 21.7.

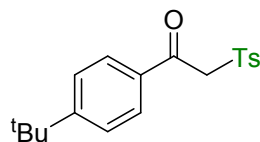

**1-(4-(tert-butyl)phenyl)-2-tosylethan-1-one (3fa)<sup>5</sup>:** White solid; 79.2 mg (isolated yield 80%); <sup>1</sup>H NMR (400 MHz, CDCl<sub>3</sub>) δ = 7.88 (d, *J* = 8.4 Hz, 2 H), 7.76 (d, *J* = 8.0 Hz, 2 H), 7.48 (d, *J* = 8.4 Hz, 2 H), 7.33 (d, *J* = 8.0 Hz, 2 H), 4.69 (s, 2 H), 2.44 (s, 3 H), 1.33 (s, 9 H); <sup>13</sup>C NMR (100 MHz, CDCl<sub>3</sub>) δ = 187.6, 158.3, 145.2, 135.7, 133.2, 129.8, 129.3, 128.6, 125.8, 63.5, 35.2, 30.9, 21.7.

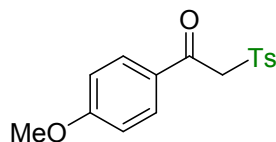

**1-(4-methoxyphenyl)-2-tosylethan-1-one (3ga)<sup>1</sup>:** White solid; 73.9 mg (isolated yield 81%); <sup>1</sup>H NMR (400 MHz, CDCl<sub>3</sub>) δ = 7.94 (d, *J* = 8.8 Hz, 2 H), 7.75 (d, *J* = 8.4 Hz, 2 H), 7.33 (d, *J* = 8.0 Hz, 2 H), 6.95 (d, *J* = 8.8 Hz, 2 H), 4.66 (s, 2 H), 3.89 (s, 3 H), 2.44 (s, 3 H); <sup>13</sup>C NMR (100 MHz, CDCl<sub>3</sub>) δ = 186.3, 164.5, 145.3, 135.7, 131.9, 129.8, 128.8, 128.6, 114.0, 63.5, 55.6, 21.7.

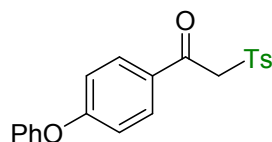

**1-(4-phenoxyphenyl)-2-tosylethan-1-one (3ha):** White solid; 80.1 mg (isolated yield 73%); <sup>1</sup>H NMR (400 MHz, CDCl<sub>3</sub>) δ = 7.94 (d, *J* = 8.8 Hz, 2 H), 7.76 (d, *J* = 8.0 Hz, 2 H), 7.44 – 7.40 (m, 2 H), 7.34 (d, *J* = 8.4 Hz, 2 H), 7.25 – 7.22 (m, 1 H), 7.08 (d, *J* = 8.0 Hz, 2 H), 6.99 (d, *J* = 8.8 Hz, 2 H), 4.67 (s, 2 H), 2.44 (s, 3 H); <sup>13</sup>C NMR (100 MHz, CDCl<sub>3</sub>) δ = 186.4, 163.2, 154.8, 145.3, 135.6, 131.9, 130.2, 130.1, 129.8, 128.5, 125.1, 120.5, 117.1, 63.5, 21.7; HRMS (ESI): *m/z* [M+H]<sup>+</sup> calcd for C<sub>21</sub>H<sub>19</sub>O<sub>4</sub>S: 367.0999; found: 367.0993.

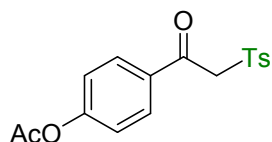

**4-(2-tosylacetyl)phenyl acetate (3ia)<sup>6</sup>:** White solid; 66.7 mg (isolated yield 67%); <sup>1</sup>H NMR (400 MHz, CDCl<sub>3</sub>) δ = 7.98 (d, *J* = 8.8 Hz, 2 H), 7.74 (d, *J* = 8.0 Hz, 2 H), 7.33 (d, *J* = 8.0 Hz, 2 H), 7.21 (d, *J* = 8.8 Hz, 2 H), 4.69 (s, 2 H), 2.44 (s, 3 H), 2.33 (s, 3 H); <sup>13</sup>C NMR (100 MHz, CDCl<sub>3</sub>) δ = 186.9, 168.6, 155.2, 145.5, 135.5, 133.2, 131.0, 129.8, 128.5, 122.0, 63.6, 21.7, 21.1; HRMS (ESI): *m/z* [M+H]<sup>+</sup> calcd for C<sub>17</sub>H<sub>17</sub>O<sub>5</sub>S: 333.0791; found: 333.0788.

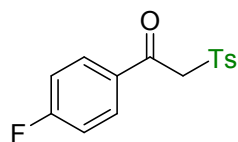

**1-(4-fluorophenyl)-2-tosylethan-1-one (3ja)<sup>7</sup>:** White solid; 70.9 mg (isolated yield 81%); <sup>1</sup>H NMR (400 MHz, CDCl<sub>3</sub>) δ = 8.02 – 7.99 (m, 2 H), 7.75 (d, *J* = 8.4 Hz, 2 H), 7.35 (d, *J* = 8.0 Hz, 2 H), 7.16 (t, *J* = 8.4 Hz, 2 H), 4.68 (s, 2 H), 2.45 (s, 3 H); <sup>13</sup>C NMR (100 MHz, CDCl<sub>3</sub>) δ = 186.5, 167.7, 145.5, 135.5, 132.3 (d, *J*<sub>C-F</sub> = 9.5 Hz), 129.9, 128.5, 128.6, 116.1 (d, *J*<sub>C-F</sub> = 20.5 Hz), 63.7, 21.7; <sup>19</sup>F NMR (376 MHz, CDCl<sub>3</sub>) δ = -102.4.

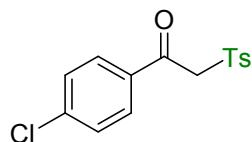

**1-(4-chlorophenyl)-2-tosylethan-1-one (3ka)<sup>8</sup>:** White solid; 79.5 mg (isolated yield 86%); <sup>1</sup>H NMR (400 MHz, CDCl<sub>3</sub>) δ = 7.91 (dd, *J*<sub>1</sub> = 6.8 Hz, *J*<sub>2</sub> = 2.0 Hz, 2 H), 7.74 (d, *J* = 8.4 Hz, 2 H), 7.46 (dd, *J*<sub>1</sub> = 6.8 Hz, *J*<sub>2</sub> = 2.0 Hz, 2 H), 7.34 (d, *J* = 8.0 Hz, 2 H), 4.68 (s, 2 H), 2.45 (s, 3 H); <sup>13</sup>C NMR (100 MHz, CDCl<sub>3</sub>) δ = 187.0, 145.6, 141.1, 135.4, 134.0, 130.8, 129.9, 129.2, 128.5, 63.7, 21.7.

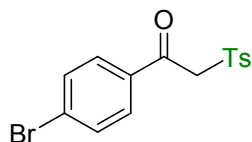

**1-(4-bromophenyl)-2-tosylethan-1-one (3la)<sup>9</sup>:** White solid; 88.7 mg (isolated yield 84%); <sup>1</sup>H NMR (400 MHz, CDCl<sub>3</sub>) δ = 7.82 (d, *J* = 8.4 Hz, 2 H), 7.74 (d, *J* = 8.0 Hz, 2 H), 7.63 (d, *J* = 8.4 Hz, 2 H), 7.34 (d, *J* = 7.6 Hz, 2 H), 4.67 (s, 2 H), 2.45 (s, 3 H); <sup>13</sup>C NMR (100 MHz, CDCl<sub>3</sub>) δ = 187.2, 145.6, 135.4, 134.4, 132.2, 130.8, 130.0, 129.9, 128.5, 63.7, 21.7.

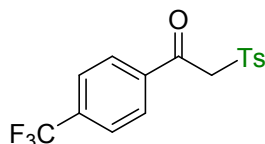

**2-tosyl-1-(4-(trifluoromethyl)phenyl)ethan-1-one (3ma)<sup>3</sup>:** White solid; 78.0 mg (isolated yield 76%); <sup>1</sup>H NMR (400 MHz, CDCl<sub>3</sub>) δ = 8.07 (d, *J* = 8.4 Hz, 2 H), 7.75 – 7.73 (m, 4 H), 7.34 (d, *J* = 8.4 Hz, 2 H), 4.74 (s, 2 H), 2.45 (s, 3 H); <sup>13</sup>C NMR (100 MHz, CDCl<sub>3</sub>) δ = 187.4, 145.7, 138.2, 135.4, 135.3 (q, *J*<sub>C-F</sub> = 32.1 Hz), 129.9, 129.7, 128.5, 125.8 (q, *J*<sub>C-F</sub> = 3.6 Hz), 123.3 (q, *J*<sub>C-F</sub> = 271.3 Hz), 63.8, 21.7; <sup>19</sup>F NMR (376 MHz, CDCl<sub>3</sub>) δ = -63.3

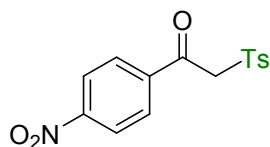

**1-(4-nitrophenyl)-2-tosylethan-1-one (3na)<sup>1</sup>:** yellow solid; 61.2 mg (isolated yield 64%); <sup>1</sup>H NMR (400 MHz, CDCl<sub>3</sub>) δ = 8.34 (d, *J* = 8.8 Hz, 2 H), 8.15 (d, *J* = 8.4 Hz, 2 H), 7.74 (d, *J* = 8.4 Hz, 2 H), 7.37 (d, *J* = 8.4 Hz, 2 H), 4.75 (s, 2 H), 2.47 (s, 3 H); <sup>13</sup>C NMR (100 MHz, CDCl<sub>3</sub>) δ = 187.0, 150.8, 145.9, 139.9, 135.2, 130.5, 130.0, 128.5, 124.0, 64.1, 21.8.

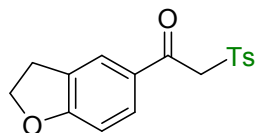

**1-(2,3-dihydrobenzofuran-5-yl)-2-tosylethan-1-one (3oa):** White solid; 69.2 mg (isolated yield 73%); <sup>1</sup>H NMR (400 MHz, CDCl<sub>3</sub>) δ = 7.77 (d, *J* = 8.4 Hz, 2 H), 7.36–7.33 (m, 3 H), 7.23 (t, *J* = 8.0 Hz, 1 H), 7.01 (d, *J* = 7.6 Hz, 1 H), 4.70 (s, 2 H), 4.59 (t, *J* = 8.8 Hz, 2 H), 3.45 (t, *J* = 8.8 Hz, 2 H), 2.45 (s, 3 H); <sup>13</sup>C NMR (100 MHz, CDCl<sub>3</sub>) δ = 188.6, 161.3, 145.3, 135.9, 132.6, 129.8, 129.5, 128.5, 128.4, 122.3, 114.9, 71.8, 64.1, 31.0, 21.7; HRMS (ESI): *m/z* [M+H]<sup>+</sup> calcd for C<sub>17</sub>H<sub>17</sub>O<sub>4</sub>S: 317.0842; found: 317.0844.

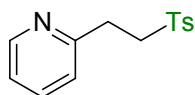

**2-(2-tosylethyl)pyridine (3pa)**<sup>7</sup>: White solid; 64.2 mg (isolated yield 82%); <sup>1</sup>H NMR (400 MHz, CDCl<sub>3</sub>) δ = 8.42 (d, *J* = 4.4 Hz, 1 H), 7.78 (d, *J* = 8.4 Hz, 2 H), 7.59 – 7.55 (m, 1 H), 7.32 (d, *J* = 8.0 Hz, 2 H), 7.15 – 7.09 (m, 2 H), 3.60 – 3.56 (m, 2 H), 3.21 – 3.17 (m, 2 H), 2.42 (s, 3 H); <sup>13</sup>C NMR (100 MHz, CDCl<sub>3</sub>) δ = 157.1, 149.3, 144.6, 136.7, 136.0, 129.8, 128.1, 123.2, 121.8, 55.2, 30.8, 21.6.

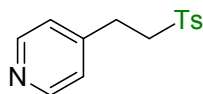

**4-(2-tosylethyl)pyridine (3qa)**: White solid; 65.0 mg (isolated yield 83%); <sup>1</sup>H NMR (400 MHz, CDCl<sub>3</sub>) δ = 8.43 (d, *J* = 5.2 Hz, 2 H), 7.75 (d, *J* = 8.4 Hz, 2 H), 7.32 (d, *J* = 8.0 Hz, 2 H), 7.03 (d, *J* = 6.0 Hz, 1 H), 3.34– 3.30 (m, 2 H), 3.02 – 2.98 (m, 2 H), 2.41 (s, 3 H); <sup>13</sup>C NMR (100 MHz, CDCl<sub>3</sub>) δ = 149.8, 146.6, 145.0, 135.5, 129.9, 127.9, 123.5, 56.0, 28.0, 21.5; HRMS (ESI): *m/z* [M+H]<sup>+</sup> calcd for C<sub>14</sub>H<sub>16</sub>NO<sub>2</sub>S: 262.0896; found: 262.0901.

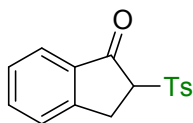

**2-tosyl-2,3-dihydro-1H-inden-1-one (3sa)**<sup>2</sup>: White solid; 60.9 mg (isolated yield 71%); <sup>1</sup>H NMR (400 MHz, CDCl<sub>3</sub>) δ = 7.80 (d, *J* = 8.0 Hz, 2 H), 7.71 (d, *J* = 8.0 Hz, 1 H), 7.62 (t, *J* = 7.6 Hz, 1 H), 7.49 (d, *J* = 7.6 Hz, 1 H), 7.40– 7.35 (m, 3 H), 4.26 (dd, *J*<sub>1</sub> = 8.4 Hz, *J*<sub>2</sub> = 3.2 Hz, 1 H), 3.81 (dd, *J*<sub>1</sub> = 18.0 Hz, *J*<sub>2</sub> = 3.2 Hz, 1 H), 3.53 (dd, *J*<sub>1</sub> = 18.0 Hz, *J*<sub>2</sub> = 8.4 Hz, 1 H), 2.44 (s, 3 H); <sup>13</sup>C NMR (100 MHz, CDCl<sub>3</sub>) δ = 194.6, 151.9, 145.3, 135.9, 135.7, 134.4, 129.7, 129.2, 128.1, 126.4, 124.8, 68.6, 28.1, 21.7.

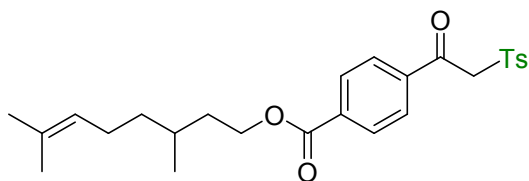

**3,7-dimethyloct-6-en-1-yl 4-(2-tosylacetyl)benzoate (3va)**: White solid; 88.9 mg (isolated yield 65%); <sup>1</sup>H NMR (400 MHz, CDCl<sub>3</sub>) δ = 8.13 (d, *J* = 8.4 Hz, 2 H), 8.00 (d, *J* = 8.4 Hz, 2 H), 7.75 (d, *J* = 8.0 Hz, 2 H), 7.34 (d, *J* = 8.0 Hz, 2 H), 5.10 (t, *J* = 7.2 Hz, 1 H), 4.73 (s, 2 H), 4.43 – 4.36 (m, 2 H), 2.45 (s, 3 H), 2.05 – 1.95 (m, 2 H), 1.85 – 1.78 (m, 1 H), 1.68 – 1.56 (m, 9 H), 1.45 – 1.36 (m, 1 H), 0.98 (d, *J* = 6.4 Hz, 3 H); <sup>13</sup>C NMR (100 MHz, CDCl<sub>3</sub>) δ = 187.8, 165.4, 145.6, 138.6, 135.5, 135.2, 131.5, 129.9, 129.9, 129.2, 128.6, 124.4, 64.2, 35.4, 29.5, 25.7, 21.7, 19.4, 17.7; HRMS (ESI): *m/z* [M+H]<sup>+</sup> calcd for C<sub>26</sub>H<sub>33</sub>O<sub>5</sub>S: 457.2043; found: 457.2045.

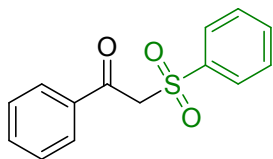

**1-phenyl-2-(phenylsulfonyl)ethan-1-one (3ab)**<sup>2</sup>: White solid; 57.7 mg (isolated yield 74%); <sup>1</sup>H NMR (400 MHz, CDCl<sub>3</sub>) δ = 7.95 – 7.89 (m, 4 H), 7.67 – 7.61 (m, 2 H), 7.55 (t, *J* = 8.0 Hz, 2 H), 7.48 (t, *J* = 8.0 Hz, 2 H), 4.74 (s, 2 H); <sup>13</sup>C NMR (100 MHz, CDCl<sub>3</sub>) δ = 187.9, 138.6, 135.7, 134.4, 134.3, 129.3, 129.2, 128.9, 128.6, 63.4.

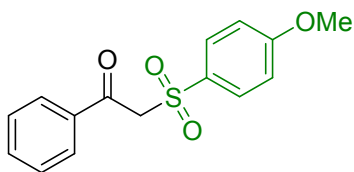

**2-((4-methoxyphenyl)sulfonyl)-1-phenylethan-1-one (3ac)**<sup>10</sup>: White solid; 70.5 mg (isolated yield 81%); <sup>1</sup>H

NMR (400 MHz, CDCl<sub>3</sub>)  $\delta$  = 7.96 – 7.93 (m, 2 H), 7.81 (d,  $J_1$  = 7.2 Hz,  $J_2$  = 2.0 Hz, 2 H), 7.63 – 7.60 (m, 1 H), 7.48 (t,  $J$  = 8.0 Hz, 2 H), 6.99 – 6.97 (m, 2 H), 4.71 (s, 2 H), 3.87 (s, 3 H); <sup>13</sup>C NMR (100 MHz, CDCl<sub>3</sub>)  $\delta$  = 188.3, 164.1, 135.7, 134.3, 130.8, 130.1, 129.3, 128.8, 114.3, 63.7, 55.7.

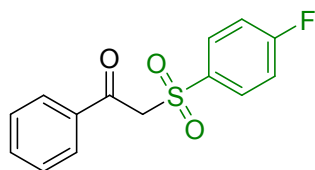

**2-((4-fluorophenyl)sulfonyl)-1-phenylethan-1-one (3ad)<sup>10</sup>:** White solid; 69.2 mg (isolated yield 83%); <sup>1</sup>H NMR (400 MHz, CDCl<sub>3</sub>)  $\delta$  = 7.95 – 7.90 (m, 4 H), 7.64 (t,  $J$  = 7.2 Hz, 1 H), 7.94 (t,  $J$  = 8.0 Hz, 2 H), 7.24 – 7.20 (m, 2 H), 4.74 (s, 2 H); <sup>13</sup>C NMR (100 MHz, CDCl<sub>3</sub>)  $\delta$  = 188.0, 166.1 (d,  $J_{C-F}$  = 255.9 Hz), 135.5, 134.6 (d,  $J_{C-F}$  = 2.9 Hz), 134.5, 131.6 (d,  $J_{C-F}$  = 9.5 Hz), 129.2, 128.9, 116.5 (d,  $J_{C-F}$  = 22.6 Hz), 63.4; <sup>19</sup>F NMR (376 MHz, CDCl<sub>3</sub>)  $\delta$  = -102.3.

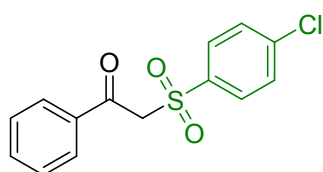

**2-((4-chlorophenyl)sulfonyl)-1-phenylethan-1-one (3ae)<sup>2</sup>:** White solid; 75.8 mg (isolated yield 86%); <sup>1</sup>H NMR (400 MHz, CDCl<sub>3</sub>)  $\delta$  = 7.93 (d,  $J$  = 8.0 Hz, 2 H), 7.84 – 7.82 (m, 2 H), 7.64 (t,  $J$  = 7.6 Hz, 1 H), 7.53 – 7.47 (m, 4 H), 4.75 (s, 2 H); <sup>13</sup>C NMR (100 MHz, CDCl<sub>3</sub>)  $\delta$  = 187.9, 141.1, 137.0, 135.5, 134.6, 130.1, 129.5, 129.2, 128.9, 63.2.

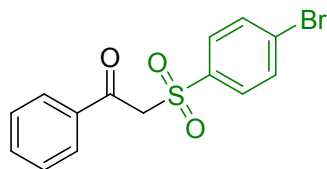

**2-((4-bromophenyl)sulfonyl)-1-phenylethan-1-one (3af)<sup>11</sup>:** White solid; 82.1 mg (isolated yield 81%); <sup>1</sup>H NMR (400 MHz, CDCl<sub>3</sub>)  $\delta$  = 7.93 (d,  $J_1$  = 8.4 Hz,  $J_2$  = 1.2 Hz, 2 H), 7.77 – 7.75 (m, 2 H), 7.70 – 7.62 (m, 3 H), 7.50 (t,  $J$  = 8.0 Hz, 2 H), 4.74 (s, 2 H); <sup>13</sup>C NMR (100 MHz, CDCl<sub>3</sub>)  $\delta$  = 187.9, 137.5, 135.5, 134.6, 132.5, 130.2, 129.8, 129.2, 128.9, 63.2.

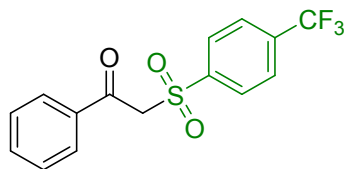

**phenyl-2-((4-(trifluoromethyl)phenyl)sulfonyl)ethan-1-one (3ag)<sup>10</sup>:** White solid; 74.8 mg (isolated yield 76%); <sup>1</sup>H NMR (400 MHz, CDCl<sub>3</sub>)  $\delta$  = 8.05 (d,  $J$  = 8.0 Hz, 2 H), 7.93 (d,  $J$  = 8.0 Hz, 2 H), 7.82 (d,  $J$  = 8.4 Hz, 2 H), 7.65 (t,  $J$  = 7.2 Hz, 1 H), 7.50 (t,  $J$  = 8.0 Hz, 2 H), 4.79 (s, 2 H); <sup>13</sup>C NMR (100 MHz, CDCl<sub>3</sub>)  $\delta$  = 187.7, 142.0, 135.8 (q,  $J_{C-F}$  = 32.8 Hz), 135.4, 134.7, 129.4, 129.2, 126.3 (q,  $J_{C-F}$  = 3.7 Hz), 123.0 (q,  $J_{C-F}$  = 272.0 Hz), 63.0; <sup>19</sup>F NMR (376 MHz, CDCl<sub>3</sub>)  $\delta$  = -63.2.

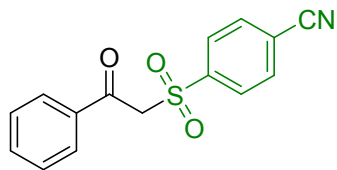

**4-((2-oxo-2-phenylethyl)sulfonyl)benzonitrile (3ah)**<sup>12</sup>: White solid; 61.6 mg (isolated yield 72%); <sup>1</sup>H NMR (400 MHz, CDCl<sub>3</sub>)  $\delta$  = 8.05 – 8.03 (m, 2 H), 7.93 – 7.91 (m, 2 H), 7.86 – 7.84 (m, 2 H), 7.68 – 7.64 (m, 1 H), 7.51 (t,  $J$  = 8.0 Hz, 2 H), 4.79 (s, 2 H); <sup>13</sup>C NMR (100 MHz, CDCl<sub>3</sub>)  $\delta$  = 187.6, 142.5, 135.3, 134.8, 132.9, 129.5, 129.1, 129.0, 117.9, 117.0, 62.9.

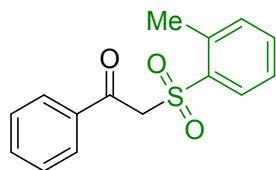

**1-phenyl-2-(o-tolylsulfonyl)ethan-1-one (3ai)**<sup>13</sup>: White solid; 52.6 mg (isolated yield 64%); <sup>1</sup>H NMR (400 MHz, CDCl<sub>3</sub>)  $\delta$  = 7.97 – 7.94 (m, 2 H), 7.89 (dd,  $J_1$  = 8.0 Hz,  $J_2$  = 1.2 Hz, 1 H), 7.64 – 7.60 (m, 1 H), 7.55 – 7.47 (m, 3 H), 7.36 – 7.31 (m, 2 H), 4.76 (s, 2 H), 2.73 (s, 3 H); <sup>13</sup>C NMR (100 MHz, CDCl<sub>3</sub>)  $\delta$  = 187.9, 138.3, 136.8, 135.8, 134.4, 134.2, 132.8, 130.5, 129.4, 128.8, 126.6, 62.9, 20.5.

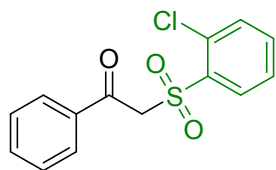

**2-((2-chlorophenyl)sulfonyl)-1-phenylethan-1-one (3aj)**<sup>10</sup>: White solid; 59.1 mg (isolated yield 67%); <sup>1</sup>H NMR (400 MHz, CDCl<sub>3</sub>)  $\delta$  = 8.06 – 8.04 (m, 1 H), 7.95 – 7.93 (m, 2 H), 7.64 – 7.58 (m, 3 H), 7.51 – 7.45 (m, 3 H), 5.06 (s, 2 H); <sup>13</sup>C NMR (100 MHz, CDCl<sub>3</sub>)  $\delta$  = 187.8, 136.4, 135.7, 135.2, 134.5, 132.7, 132.0, 131.8, 129.1, 128.9, 127.5, 60.8.

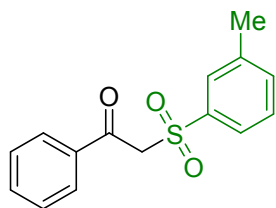

**1-phenyl-2-(m-tolylsulfonyl)ethan-1-one (3ak)**<sup>16</sup>: White solid; 67.4 mg (isolated yield 82%); <sup>1</sup>H NMR (400 MHz, CDCl<sub>3</sub>)  $\delta$  = 7.96 – 7.94 (m, 2 H), 7.88 (dd,  $J_1$  = 7.6 Hz,  $J_2$  = 1.2 Hz, 1 H), 7.64 – 7.60 (m, 1 H), 7.55 – 7.46 (m, 3 H), 7.35 – 7.31 (m, 2 H), 4.76 (s, 2 H), 2.73 (s, 3 H); <sup>13</sup>C NMR (100 MHz, CDCl<sub>3</sub>)  $\delta$  = 187.9, 138.3, 136.8, 135.7, 134.3, 134.2, 132.8, 130.5, 129.4, 128.8, 126.6, 62.8, 20.5.

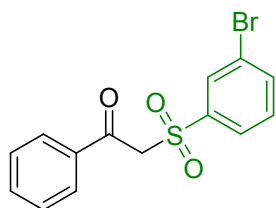

**2-((3-bromophenyl)sulfonyl)-1-phenylethan-1-one (3al)**<sup>14</sup>: White solid; 86.2 mg (isolated yield 85%); <sup>1</sup>H NMR



(400 MHz, CDCl<sub>3</sub>)  $\delta$  = 8.04 (s, 1 H), 7.93 (d,  $J$  = 7.6 Hz, 2 H), 7.84 (d,  $J$  = 8.0 Hz, 1 H), 7.78 (d,  $J$  = 8.4 Hz, 1 H), 7.64 (t,  $J$  = 7.2 Hz, 1 H), 7.50 (t,  $J$  = 8.0 Hz, 2 H), 7.43 (t,  $J$  = 8.0 Hz, 1 H), 4.76 (s, 2 H); <sup>13</sup>C NMR (100 MHz, CDCl<sub>3</sub>)  $\delta$  = 187.7, 140.4, 137.3, 135.5, 134.6, 131.4, 130.7, 129.2, 128.9, 127.3, 123.2, 63.2.

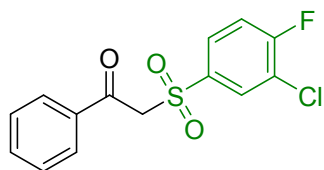

**2-((3-chloro-4-fluorophenyl)sulfonyl)-1-phenylethan-1-one (3am)**: White solid; 83.3 mg (isolated yield 89%); <sup>1</sup>H NMR (400 MHz, CDCl<sub>3</sub>)  $\delta$  = 8.00 – 7.97 (m, 1 H), 7.93 (d,  $J$  = 7.6 Hz, 2 H), 7.84 – 7.79 (m, 1 H), 7.65 (t,  $J$  = 7.6 Hz, 1 H), 7.50 (t,  $J$  = 8.0 Hz, 2 H), 7.31 (t,  $J$  = 8.8 Hz, 1 H), 4.76 (s, 2 H); <sup>13</sup>C NMR (100 MHz, CDCl<sub>3</sub>)  $\delta$  = 187.8, 161.6 (d,  $J_{C-F}$  = 258.1 Hz), 135.5 (d,  $J_{C-F}$  = 3.6 Hz), 135.4, 134.7, 131.8 (d,  $J_{C-F}$  = 1.5 Hz), 129.5 (d,  $J_{C-F}$  = 8.8 Hz), 129.1, 129.0, 122.6 (d,  $J_{C-F}$  = 18.9 Hz), 117.5 (d,  $J_{C-F}$  = 22.6 Hz), 63.1; <sup>19</sup>F NMR (376 MHz, CDCl<sub>3</sub>)  $\delta$  = -104.5; HRMS (ESI):  $m/z$  [M+H]<sup>+</sup> calcd for C<sub>14</sub>H<sub>11</sub>ClFO<sub>3</sub>S: 313.0096; found: 313.0092.

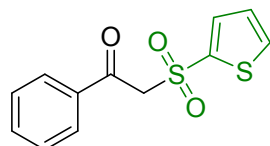

**phenyl-2-(thiophen-2-ylsulfonyl)ethanone (3an)**<sup>14</sup>: White solid; 50.3 mg (isolated yield 63%); <sup>1</sup>H NMR (400 MHz, CDCl<sub>3</sub>)  $\delta$  = 7.96 – 7.94 (m, 2 H), 7.74 (dd,  $J_1$  = 5.2 Hz,  $J_2$  = 1.6 Hz, 1 H), 7.70 (dd,  $J_1$  = 4.0 Hz,  $J_2$  = 1.6 Hz, 1 H), 7.65 – 7.61 (m, 1 H), 7.51 – 7.47 (m, 2 H), 7.14 – 7.12 (m, 1 H), 4.83 (s, 2 H); <sup>13</sup>C NMR (100 MHz, CDCl<sub>3</sub>)  $\delta$  = 187.8, 139.3, 135.6, 135.5, 135.0, 134.5, 129.2, 128.9, 127.9, 64.3.

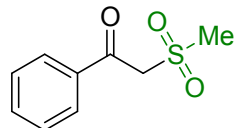

**2-(methylsulfonyl)-1-phenylethanone (3ao)**<sup>7</sup>: White solid; 24.9 mg (isolated yield 42%); <sup>1</sup>H NMR (400 MHz, CDCl<sub>3</sub>)  $\delta$  = 8.00 – 7.98 (m, 2 H), 7.66 (t,  $J$  = 7.2 Hz, 1 H), 7.52 (t,  $J$  = 8.0 Hz, 2 H), 4.61 (s, 2 H), 3.15 (s, 3 H); <sup>13</sup>C NMR (100 MHz, CDCl<sub>3</sub>)  $\delta$  = 189.2, 135.5, 134.7, 129.2, 129.0, 61.1, 41.8.

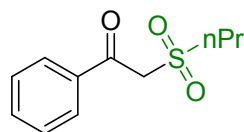

**phenyl-2-(propylsulfonyl)ethanone (3ap)**<sup>4</sup>: White solid; 30.5 mg (isolated yield 45%); <sup>1</sup>H NMR (400 MHz, CDCl<sub>3</sub>)  $\delta$  = 8.02 – 8.00 (m, 2 H), 7.65 (t,  $J$  = 7.2 Hz, 1 H), 7.53 (t,  $J$  = 7.6 Hz, 2 H), 4.56 (s, 2 H), 3.26 – 3.22 (m, 2 H), 1.97 – 1.91 (m, 2 H), 1.11 (t,  $J$  = 7.6 Hz, 3 H); <sup>13</sup>C NMR (100 MHz, CDCl<sub>3</sub>)  $\delta$  = 189.3, 135.7, 134.6, 129.3, 129.0, 59.5, 55.3, 15.8, 13.0.

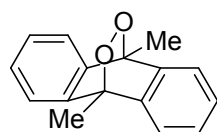

**9,10-dimethyl-9,10-dihydro-9,10-epidioxyanthracene (5b)**<sup>15</sup>: White solid; 54.3 mg (isolated yield 76%); <sup>1</sup>H NMR (400 MHz, CDCl<sub>3</sub>)  $\delta$  = 7.41 – 7.38 (m, 3 H), 7.31 – 7.28 (m, 3 H), 2.16 (s, 6 H); <sup>13</sup>C NMR (100 MHz, CDCl<sub>3</sub>)  $\delta$  = 140.7, 127.4, 120.7, 79.5, 13.7.

#### 4. References

1. Hsueh, N.-C.; Chen, H.-Y.; Chang, M.-Y., Construction of Sulfonyl Oxabenz[3.3.1]bicyclic Core via Cyclocondensation of  $\beta$ -Ketosulfones and o-Formyl Allylbenzenes. *J. Org. Chem.* **2017**, *82* (24), 13324-13332.
2. Wen, J.; Yang, X.; Sun, Z.; Yang, J.; Han, P.; Liu, Q.; Dong, H.; Gu, M.; Huang, L.; Wang, H., Biomimetic photocatalytic sulfonation of alkenes to access  $\beta$ -ketosulfones with single-atom iron site. *Green Chem.* **2020**, *22* (1), 230-237.
3. Xie, L.; Zhen, X.; Huang, S.; Su, X.; Lin, M.; Li, Y., Photoinduced rearrangement of vinyl tosylates to  $\beta$ -ketosulfones. *Green Chem.* **2017**, *19* (15), 3530-3534.
4. Lin, B.; Kuang, J.; Chen, J.; Hua, Z.; Khakyzadeh, V.; Xia, Y., A one-pot protocol for the synthesis of  $\beta$ -ketosulfones from  $\alpha,\alpha$ -dibromoketones. *Org. Chem. Front.* **2019**, *6* (15), 2647-2653.
5. Xia, Y.; Chen, X.; Qu, L.; Sun, K.; Xia, X.; Fu, W.; Chen, X.; Yang, Y.; Zhao, Y.; Li, C., Synthesis of  $\beta$ -Ketosulfones by using Sulfonyl Chloride as a Sulfur Source. *Asian. J. Org. Chem.* **2016**, *5* (7), 878-881.
6. Samakkanad, N.; Katrun, P.; Techajaronjit, T.; Hlekhilai, S.; Pohmakotr, M.; Reutrakul, V.; Jaipetch, T.; Soorukram, D.; Kuhakarn, C., IBX/I<sub>2</sub>-Mediated Reaction of Sodium Arenesulfonates with Alkenes: Facile Synthesis of  $\beta$ -Keto Sulfones. *Synthesis* **2012**, *44* (11), 1693-1699.
7. Yang, X.; Yang, J.; Yan, K.; Qin, H.; Dong, W.; Wen, J.; Wang, H., A Naphthalimide-Based ND-O-EAc Photocatalyst for Sulfonation of Alkenes to Access  $\beta$ -Ketosulfones Under Visible Light. *Eur. J. Org. Chem.* **2020**, *2020* (23), 3456-3461.
8. Chen, Y.; Xu, L.; Wang, B.; Jiang, J.; Sun, Y.; Li, L., Copper-catalyzed aerobic oxidative cross-coupling reactions of vinylarenes with sulfinate salts: A direct approach to  $\beta$ -ketosulfones. *Tetrahedron Lett.* **2021**, *65*, 152794.
9. Yavari, I.; Shaabanzadeh, S., Electrochemical Synthesis of  $\beta$ -Ketosulfones from Switchable Starting Materials. *Org. Lett.* **2020**, *22* (2), 464-467.
10. Tang, X.; Huang, L.; Xu, Y.; Yang, J.; Wu, W.; Jiang, H., Copper-Catalyzed Coupling of Oxime Acetates with Sodium Sulfonates: An Efficient Synthesis of Sulfone Derivatives. *Angew. Chem. Int. Ed.* **2014**, *53* (16), 4205-4208.
11. Xiong, Y.-S.; Weng, J.; Lu, G., Manganese(III)-Mediated and -Catalyzed Decarboxylative Hydroxysulfonylation of Arylpropionic Acids with Sodium Sulfonates in Water. *Adv. Synth. Catal.* **2018**, *360* (8), 1611-1616.
12. Wu, J.; Zhang, Y.; Gong, X.; Meng, Y.; Zhu, C., Visible-light promoted aerobic difunctionalization of alkenes with sulfonyl hydrazides for the synthesis of  $\beta$ -keto/hydroxyl sulfones. *Org. Biomol. Chem.* **2019**, *17* (14), 3507-3513.
13. Yu, J.; Mao, R.; Wang, Q.; Wu, J., Synthesis of  $\beta$ -keto sulfones via a multicomponent reaction through sulfonylation and decarboxylation. *Org. Chem. Front.* **2017**, *4* (4), 617-621.
14. Liu, Q.; Liu, F.; Yue, H.; Zhao, X.; Li, J.; Wei, W., Photocatalyst-Free Visible Light-Induced Synthesis of  $\beta$ -Oxo Sulfones via Oxysulfonylation of Alkenes with Arylazo Sulfones and Dioxygen in Air. *Adv. Synth. Catal.* **2019**, *361* (22), 5277-5282.
15. Li, G.; Yan, Q.; Gong, X.; Dou, X.; Yang, D., Photocatalyst-Free Regioselective C-H Thiocyanation of 4-Anilinocoumarins under Visible Light. *ACS Sustainable Chem. Eng.* **2019**, *7* (16), 14009-14015.
16. Li, G.; Yan, Q.; Gong, X.; Dou, X.; Yang, D., Photocatalyst-Free Regioselective C-H Thiocyanation of 4-Anilinocoumarins under Visible Light. *ACS Sustainable Chem. Eng.* **2019**, *7* (16), 14009-14015.

## 5. <sup>1</sup>H and <sup>13</sup>C NMR spectra of products

### phenyl-2-tosylethan-1-one (3aa)

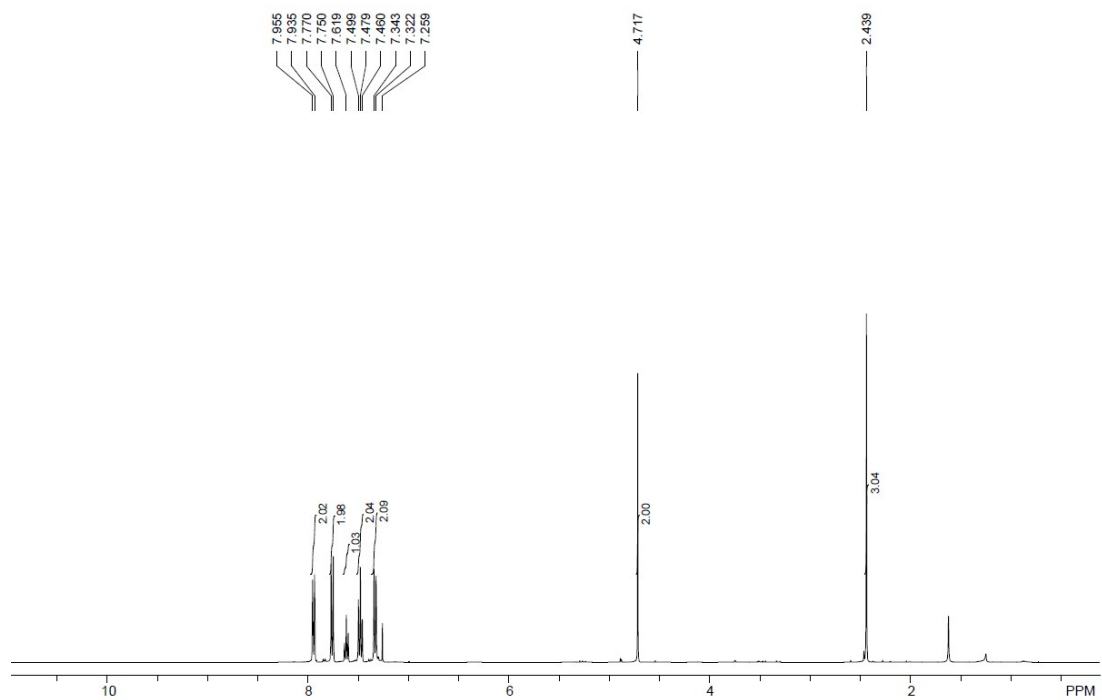

<sup>1</sup>H spectra of 3aa

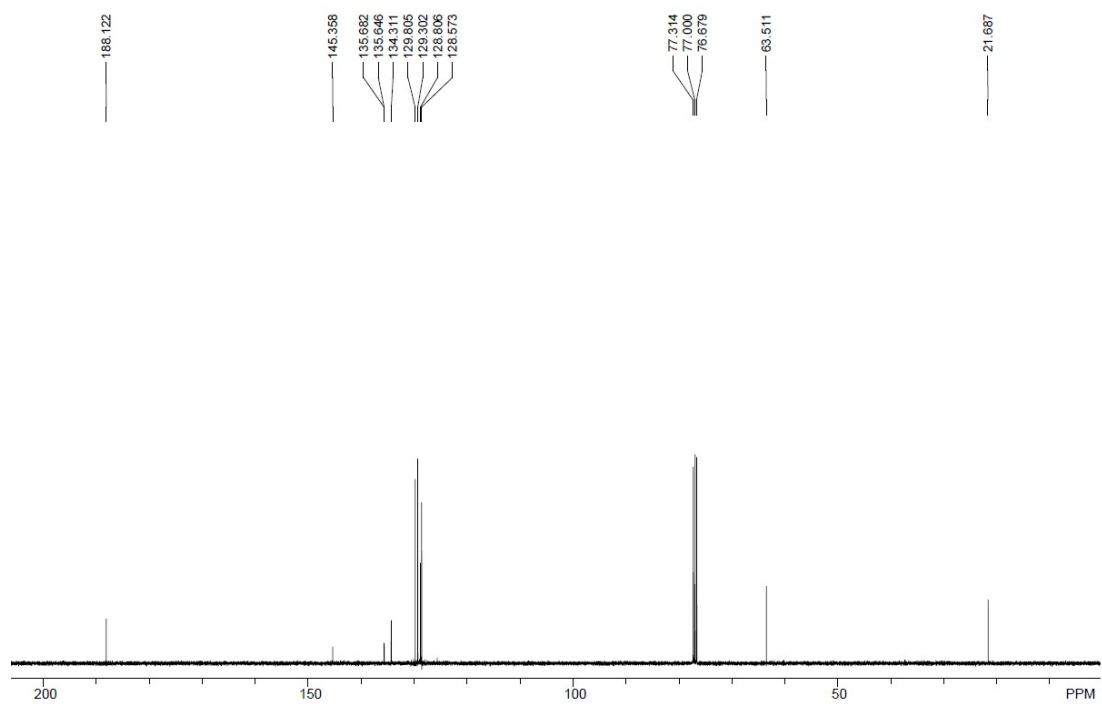

<sup>13</sup>C spectra of 3aa

1-(p-tolyl)-2-tosylethan-1-one (3ba)

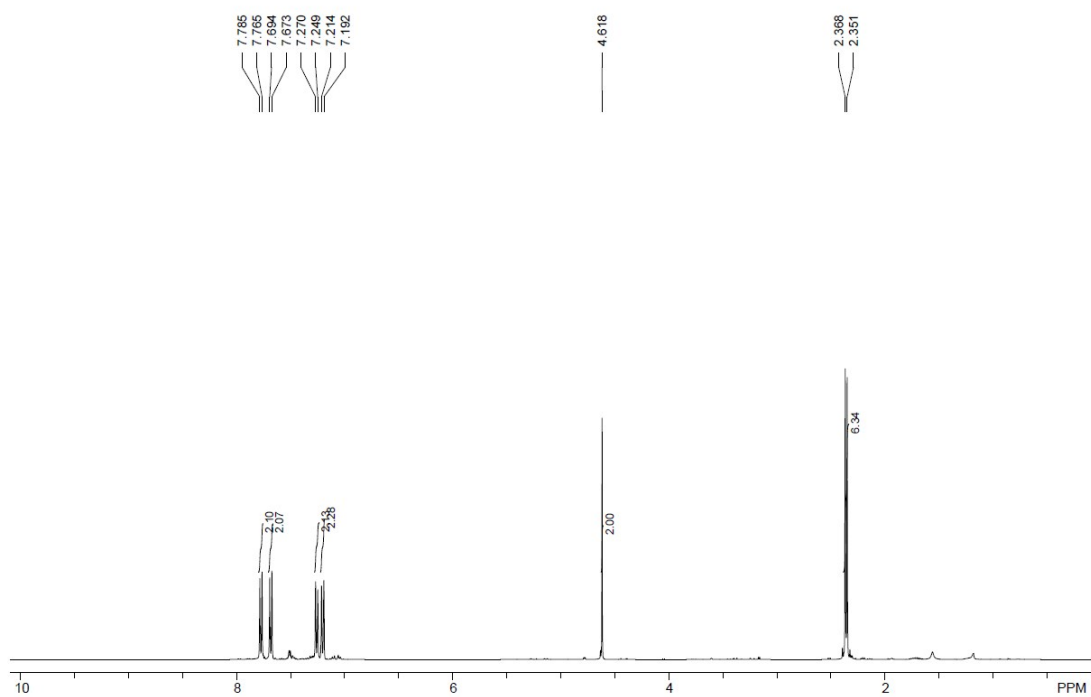

<sup>1</sup>H spectra of 3ba

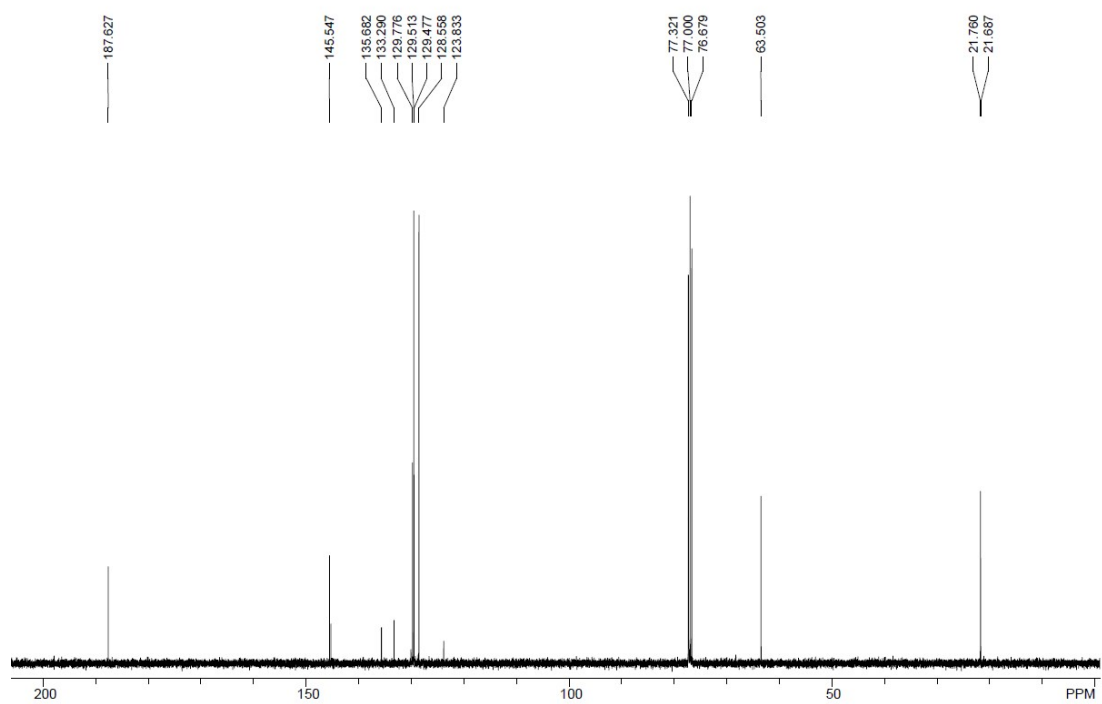

<sup>13</sup>C spectra of 3ba

1-(o-tolyl)-2-tosylethan-1-one (3ca)

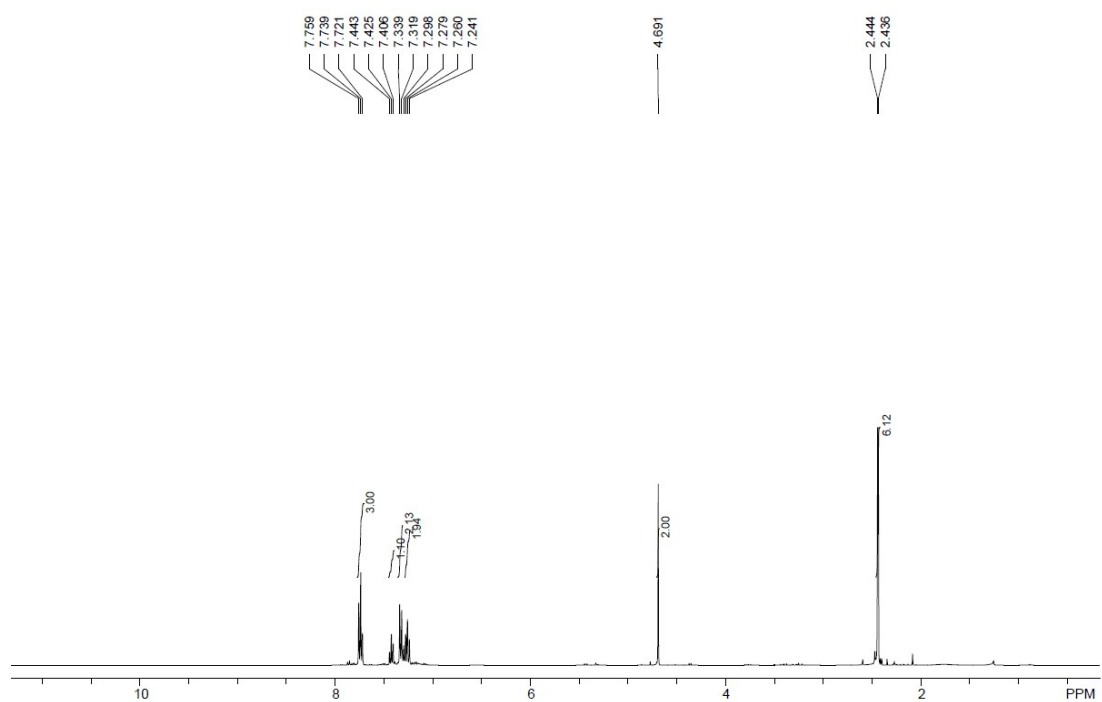

<sup>1</sup>H spectra of 3ca

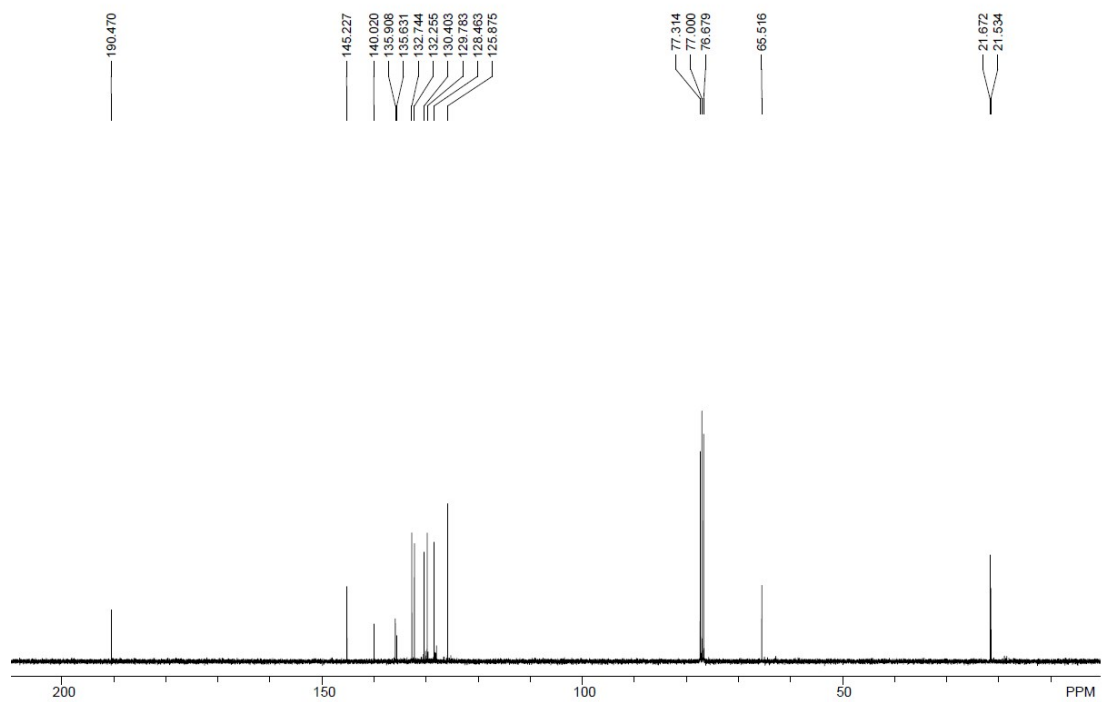

<sup>13</sup>C spectra of 3ca

1-(m-tolyl)-2-tosylethan-1-one (3da)

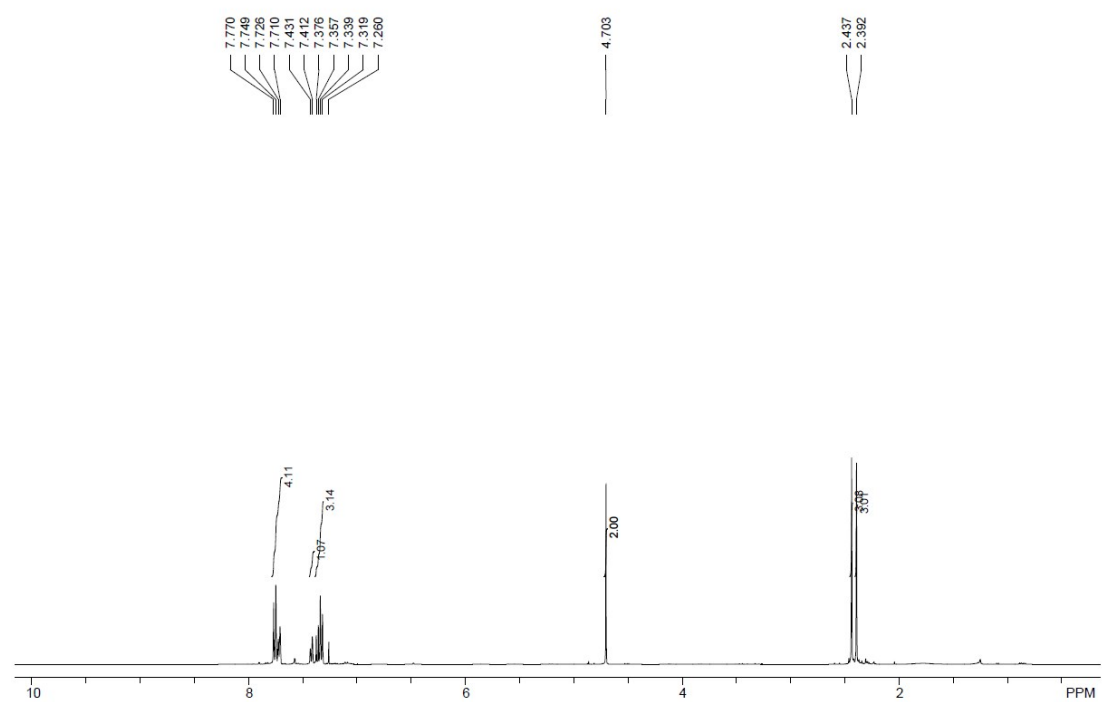

<sup>1</sup>H spectra of 3da

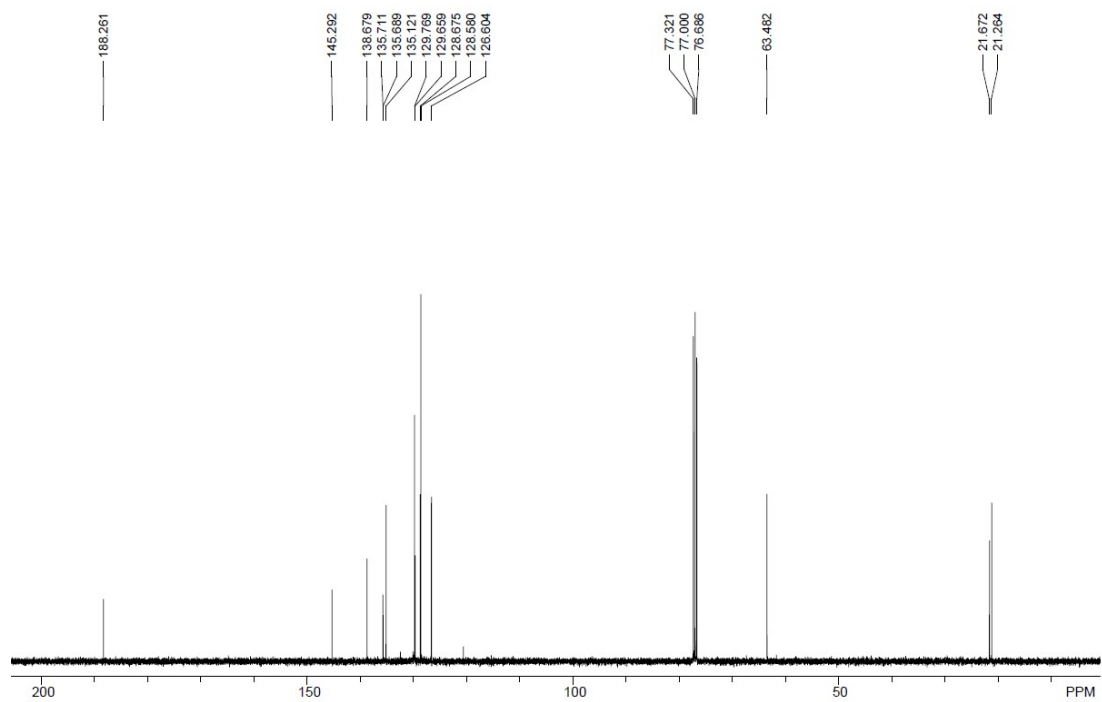

<sup>13</sup>C spectra of 3da

1-(3-bromophenyl)-2-tosylethan-1-one (3ea)

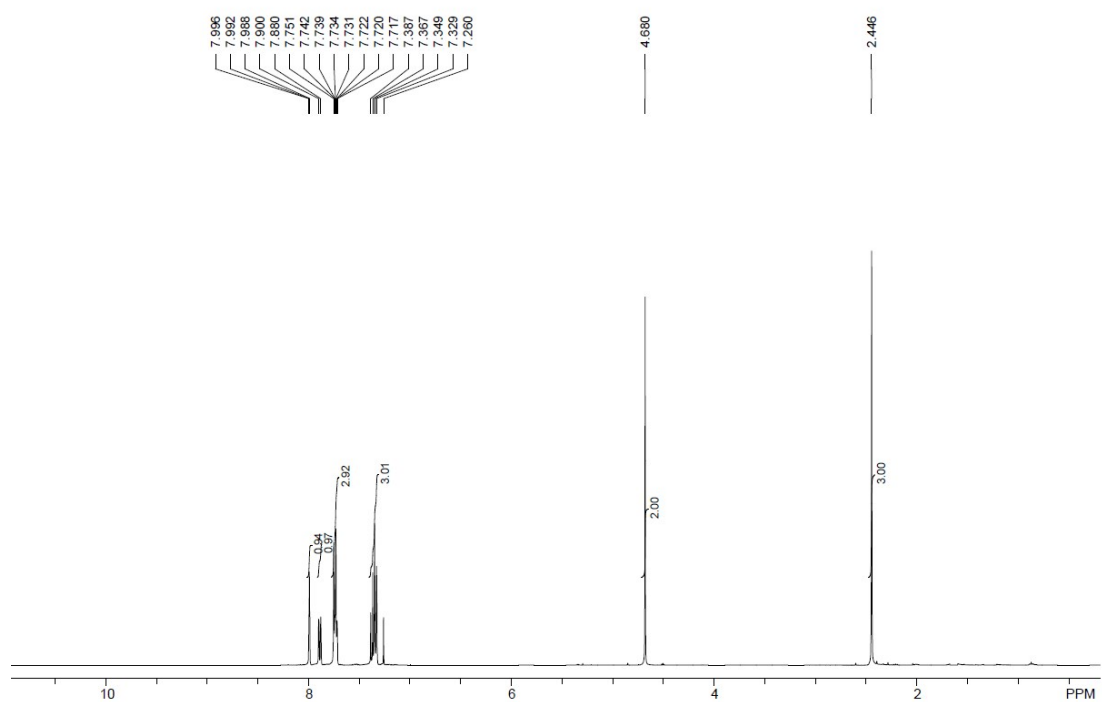

<sup>1</sup>H spectra of 3ea

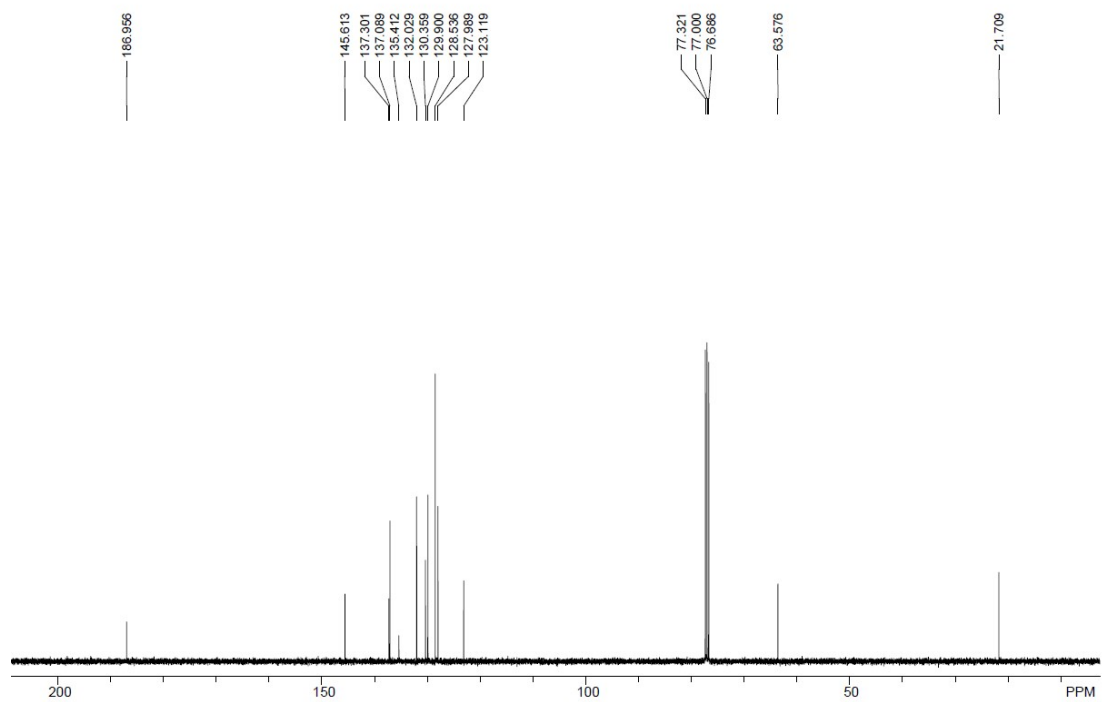

<sup>13</sup>C spectra of 3ea

1-(4-(tert-butyl)phenyl)-2-tosylethan-1-one (3fa)

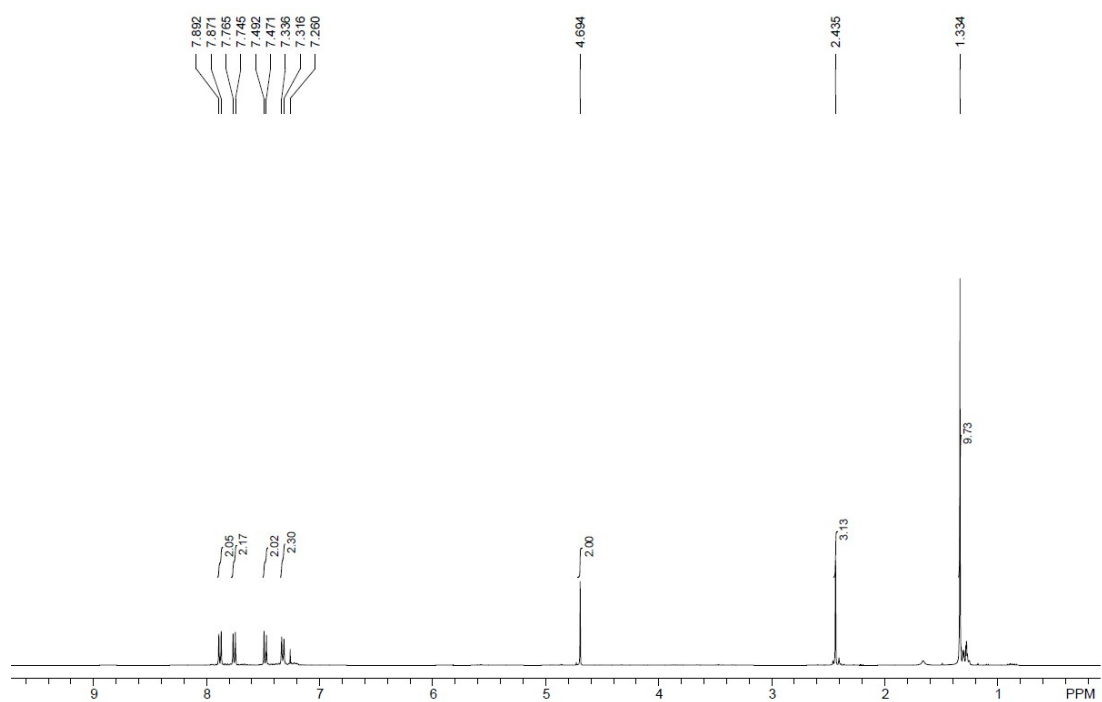

<sup>1</sup>H spectra of 3fa

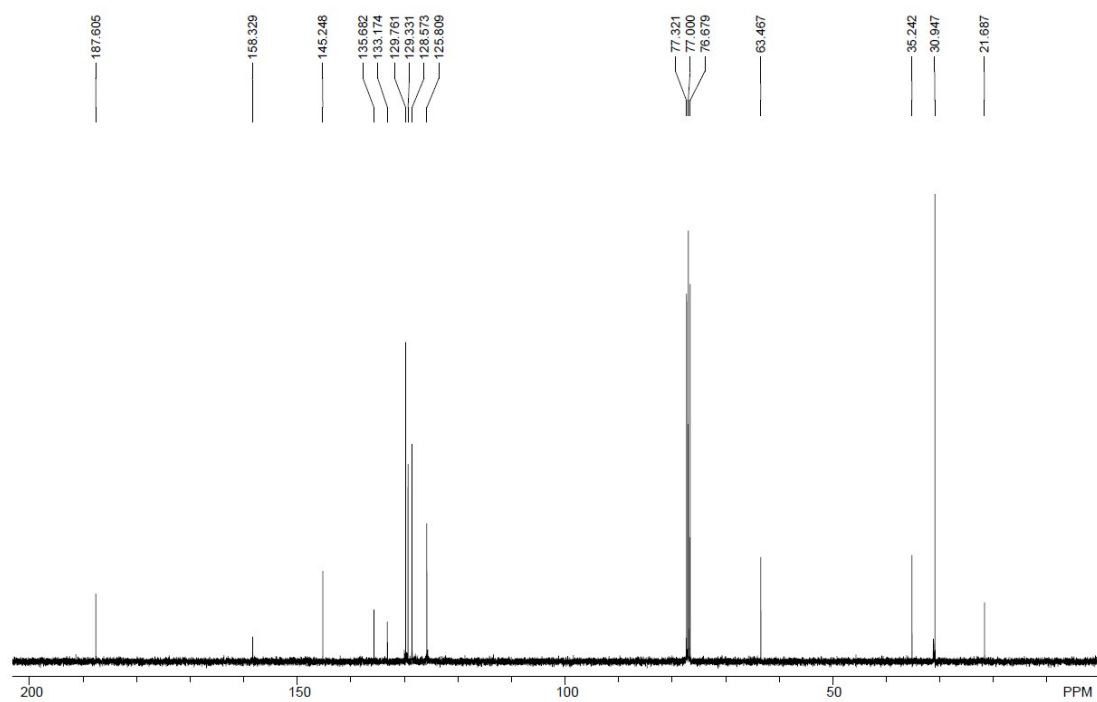

<sup>13</sup>C spectra of 3fa



1-(4-methoxyphenyl)-2-tosylethan-1-one (3ga)

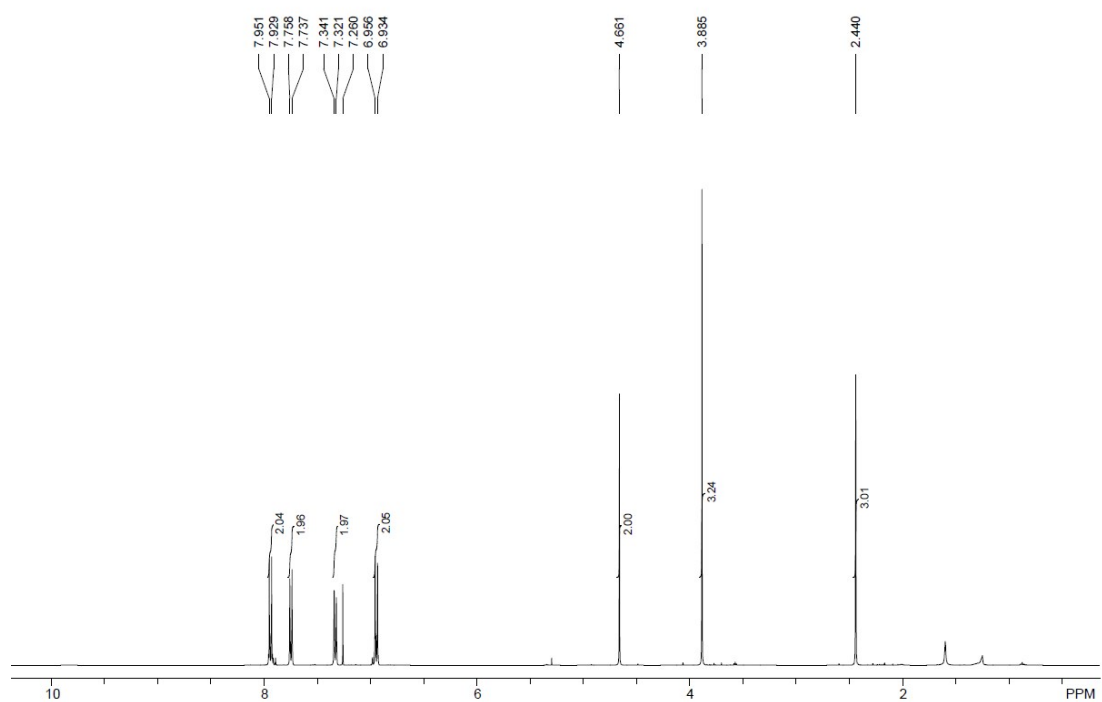

<sup>1</sup>H spectra of 3ga

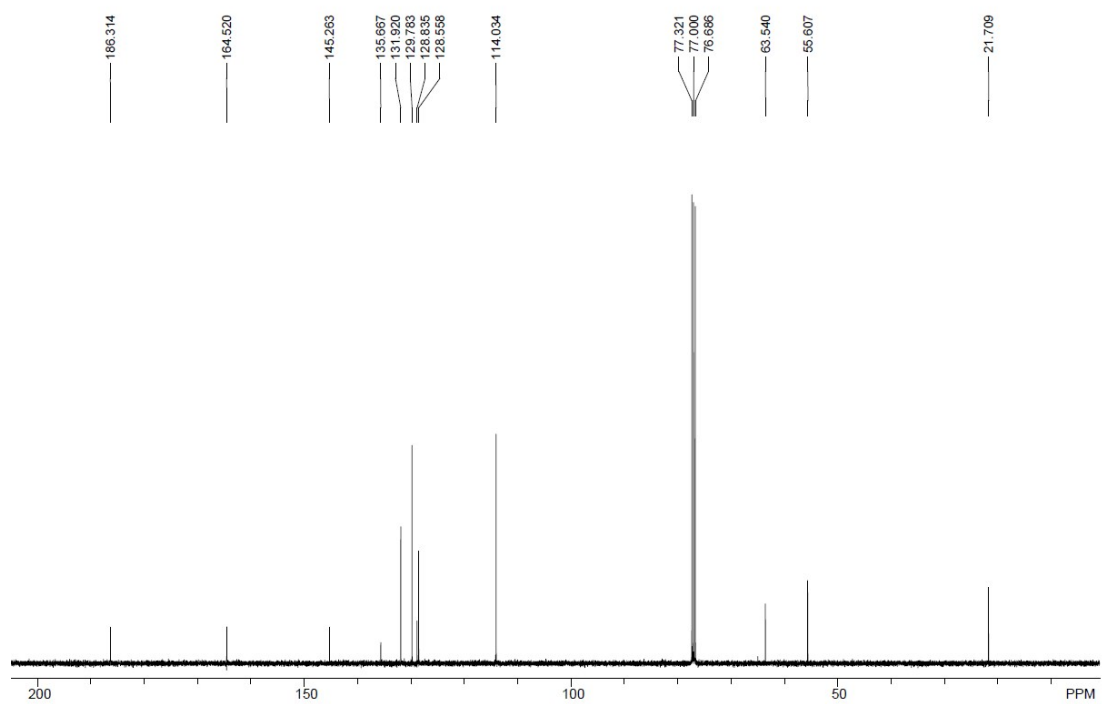

<sup>13</sup>C spectra of 3ga

1-(4-phenoxyphenyl)-2-tosylethan-1-one (3ha)

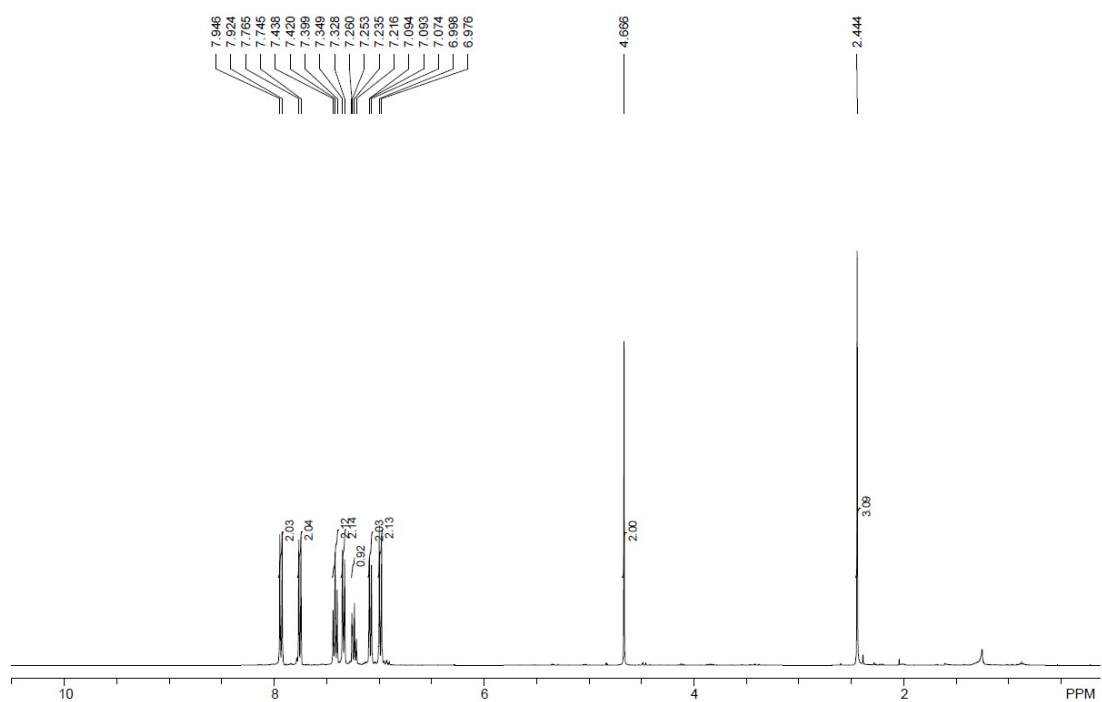

<sup>1</sup>H spectra of 3ha

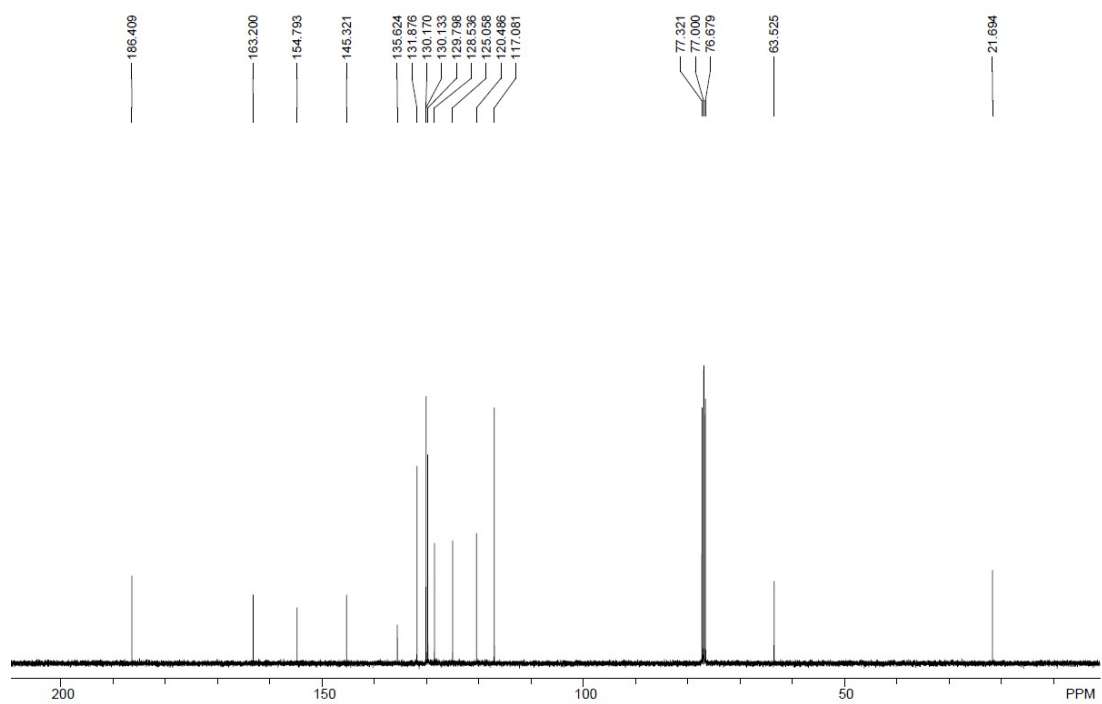

<sup>13</sup>C spectra of 3ha

4-(2-tosylacetyl)phenyl acetate (**3ia**)

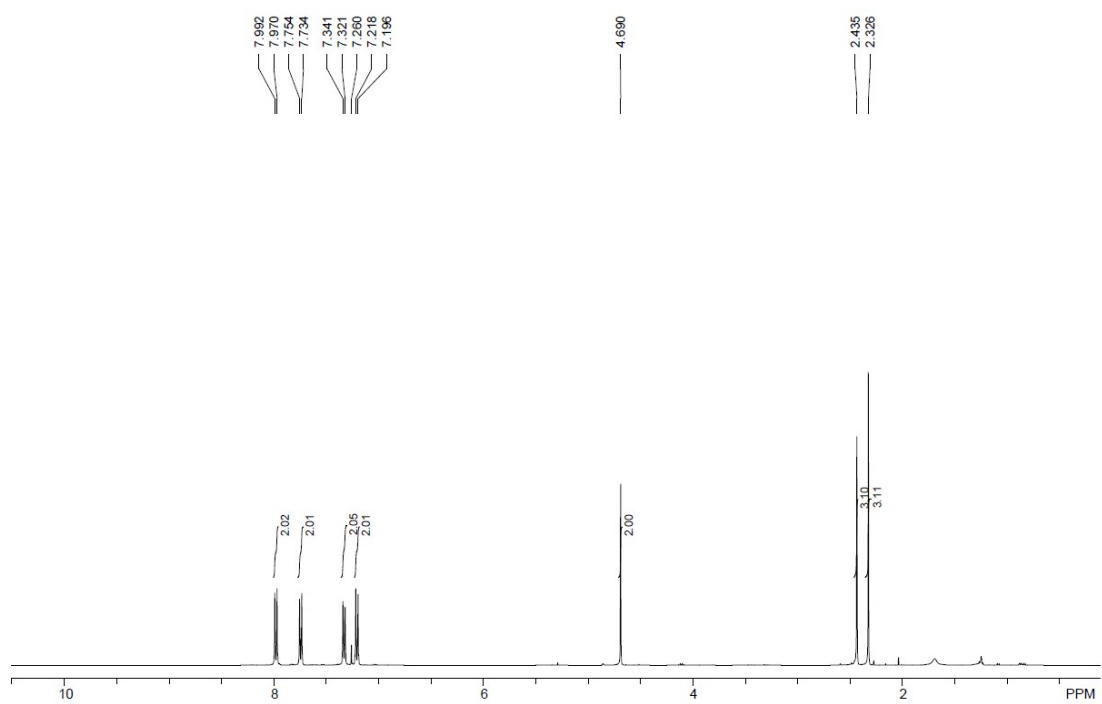

<sup>1</sup>H spectra of **3ia**

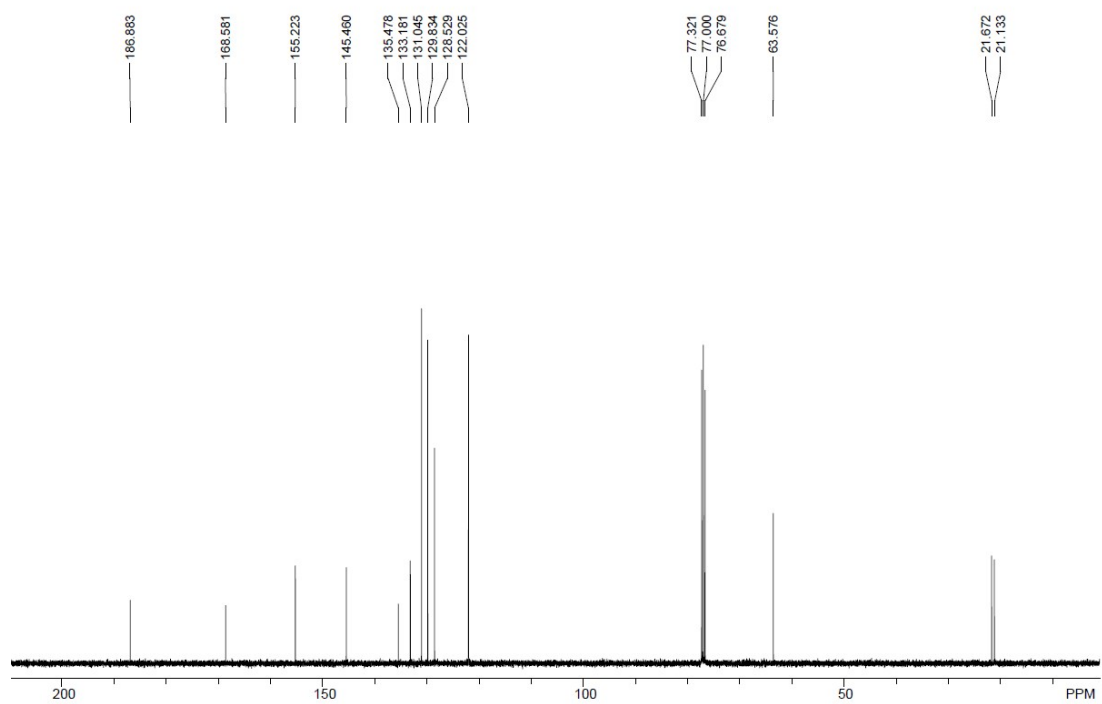

<sup>13</sup>C spectra of **3ia**

1-(4-fluorophenyl)-2-tosylethan-1-one (3ja)

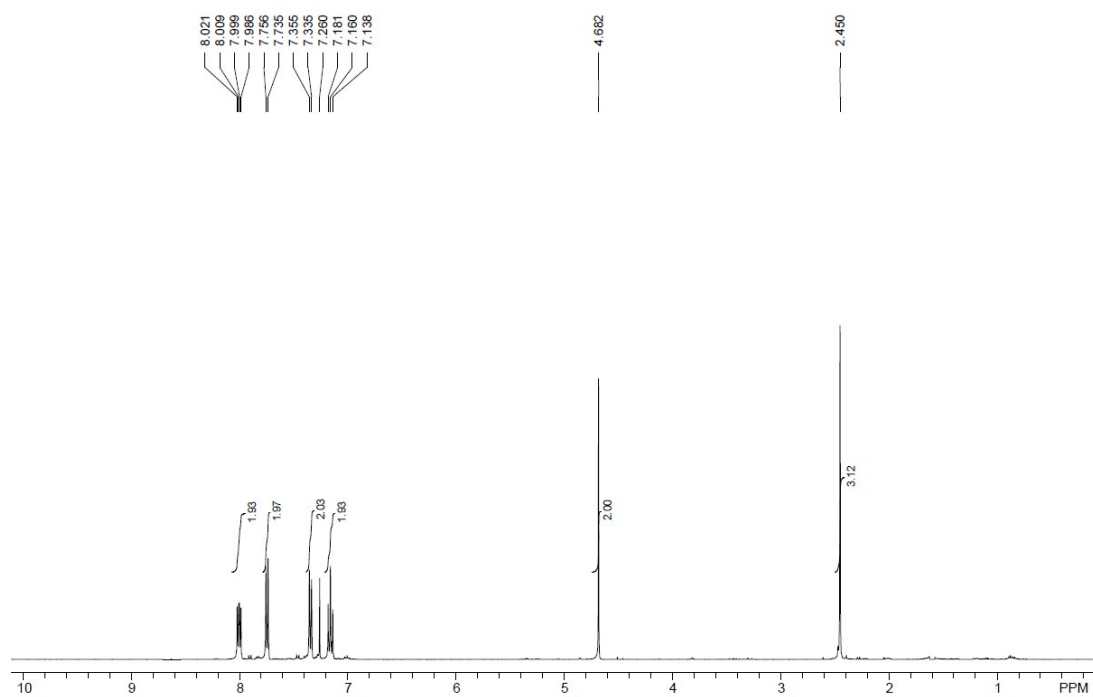

<sup>1</sup>H spectra of 3ja

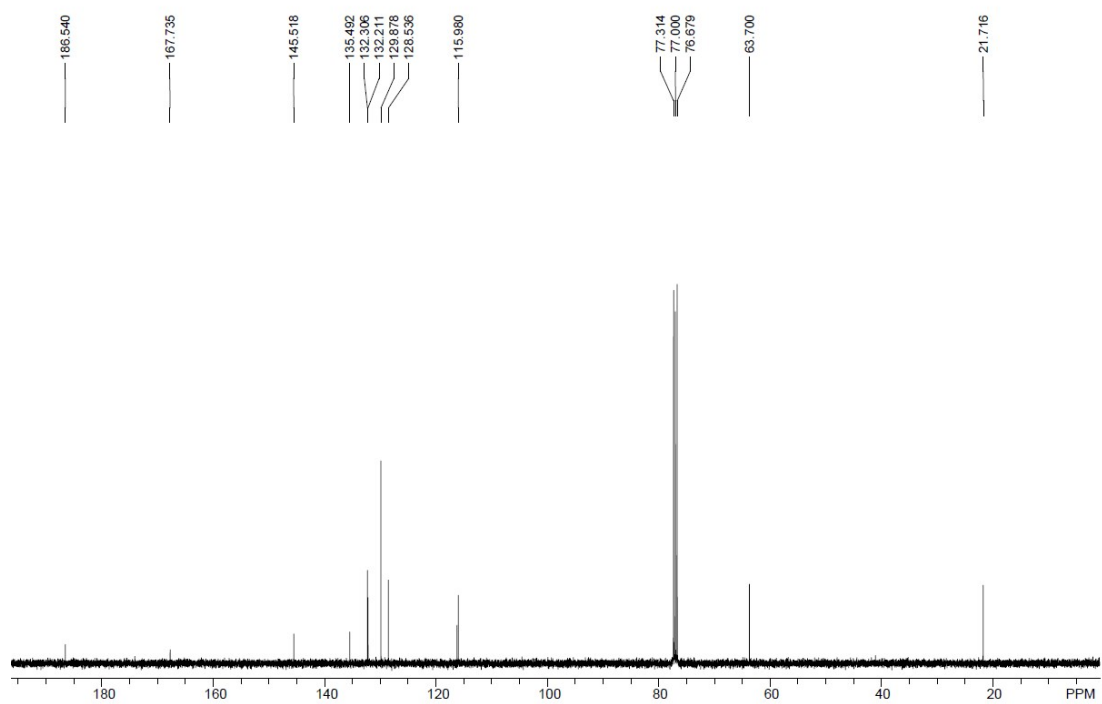

<sup>13</sup>C spectra of 3ja

1-(4-chlorophenyl)-2-tosylethan-1-one (3ka)

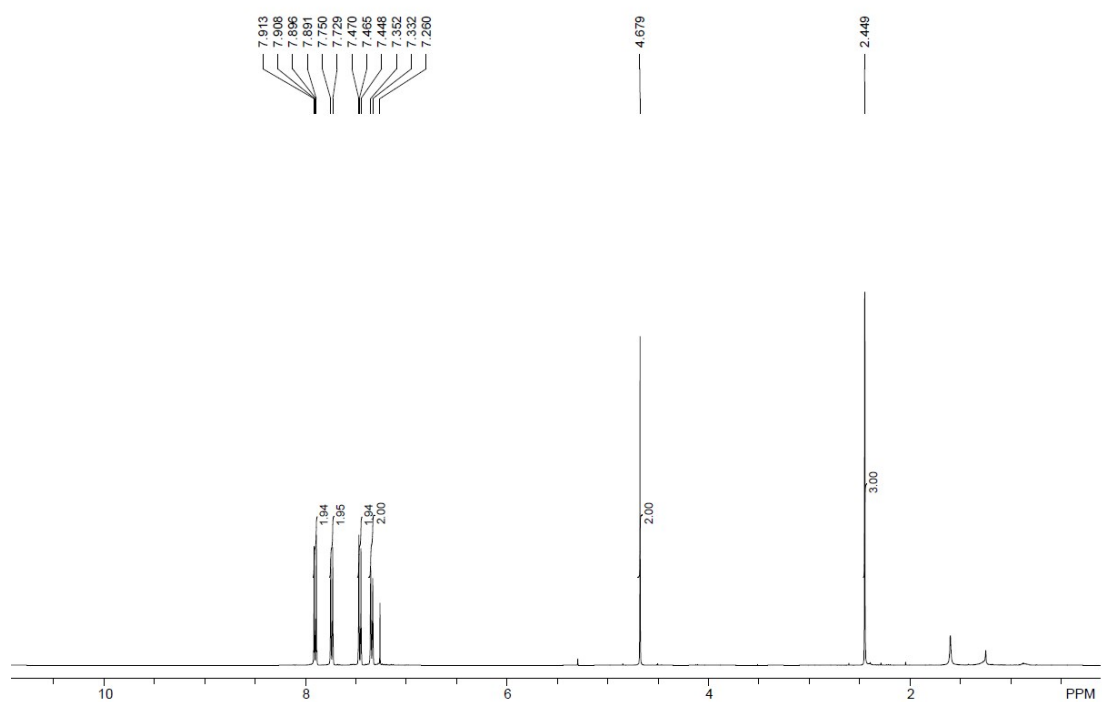

<sup>1</sup>H spectra of 3ka

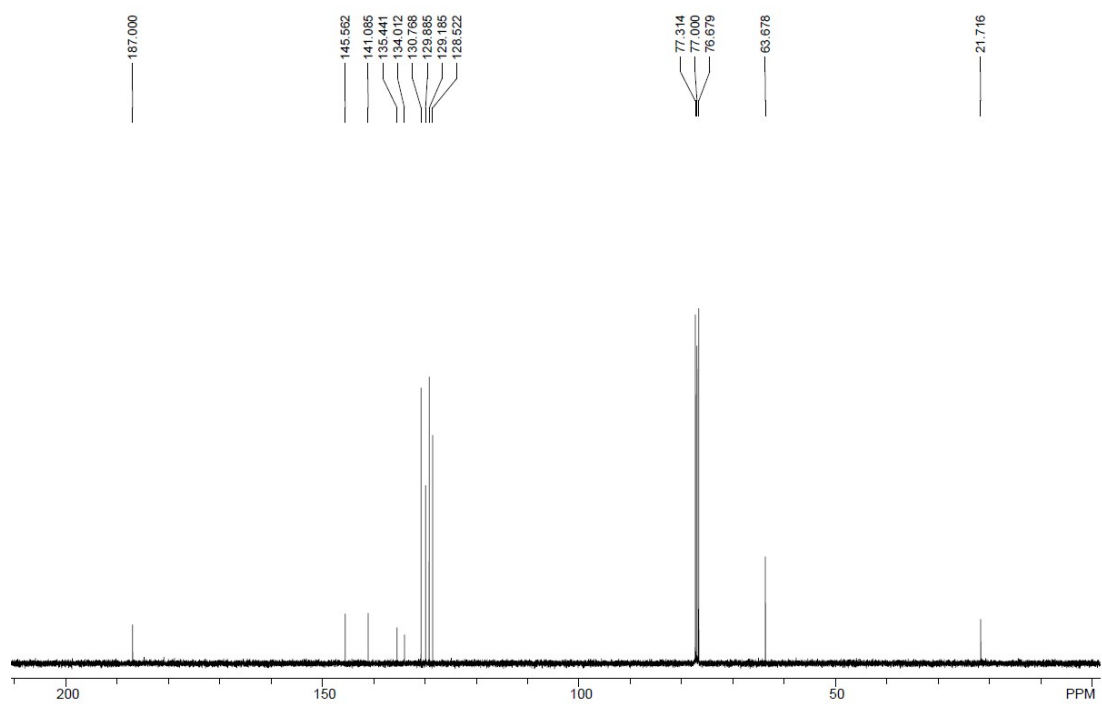

<sup>13</sup>C spectra of 3ka

1-(4-bromophenyl)-2-tosylethan-1-one (3la)

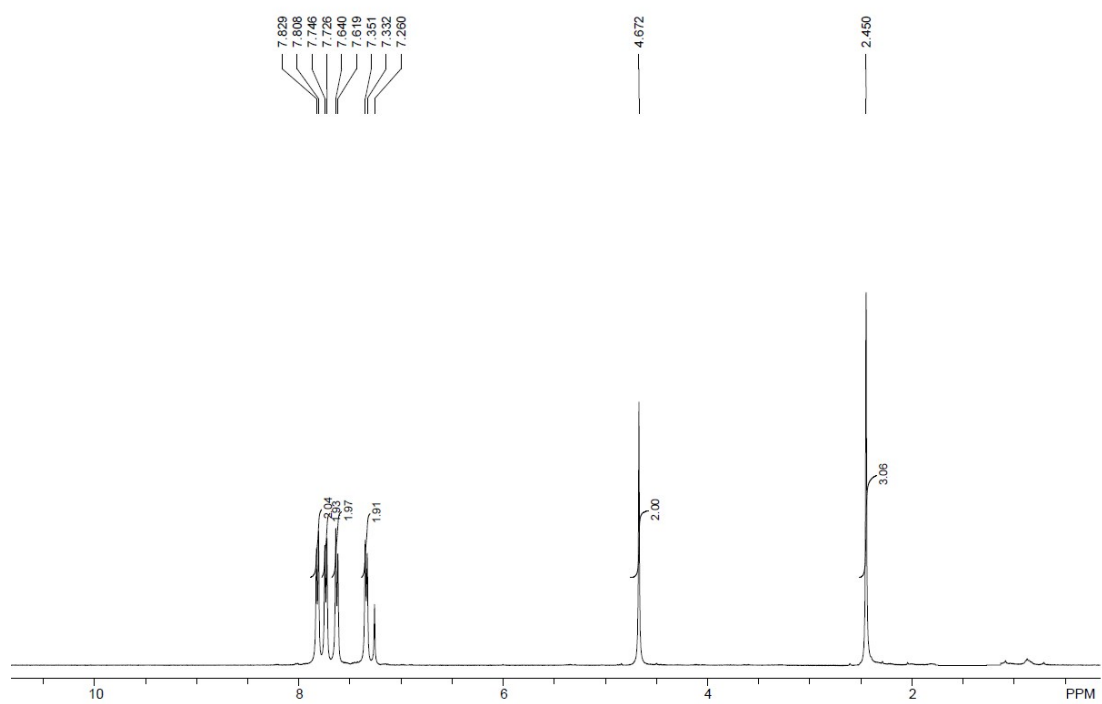

<sup>1</sup>H spectra of 3la

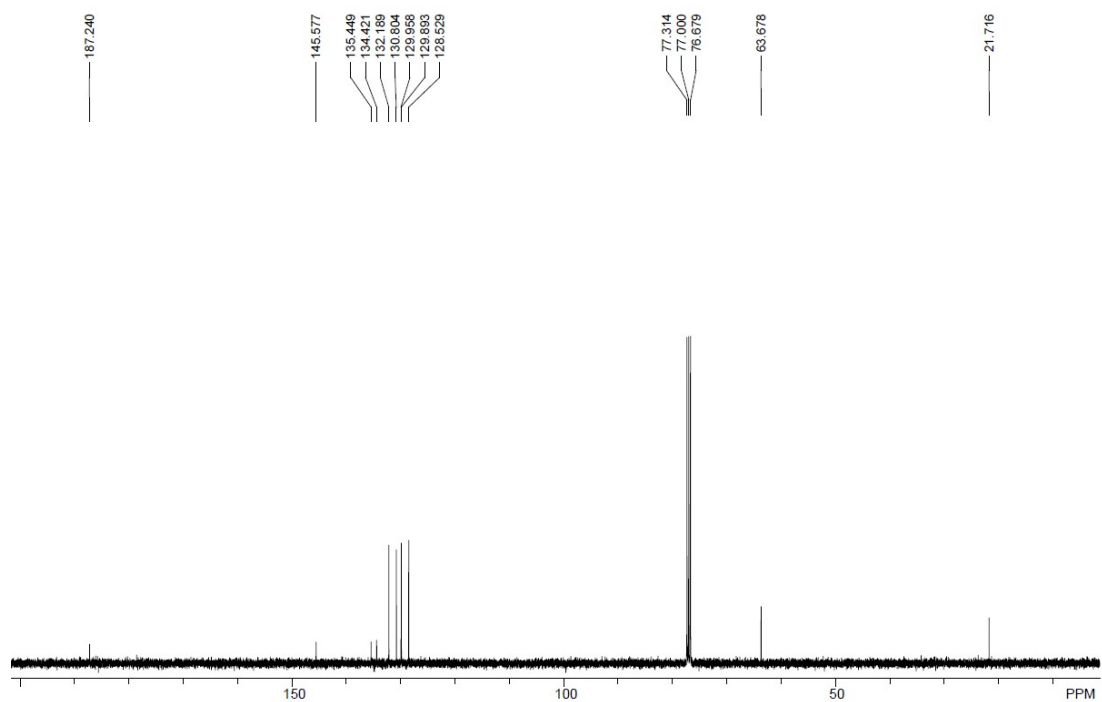

<sup>13</sup>C spectra of 3la

2-tosyl-1-(4-(trifluoromethyl)phenyl)ethan-1-one (3ma)

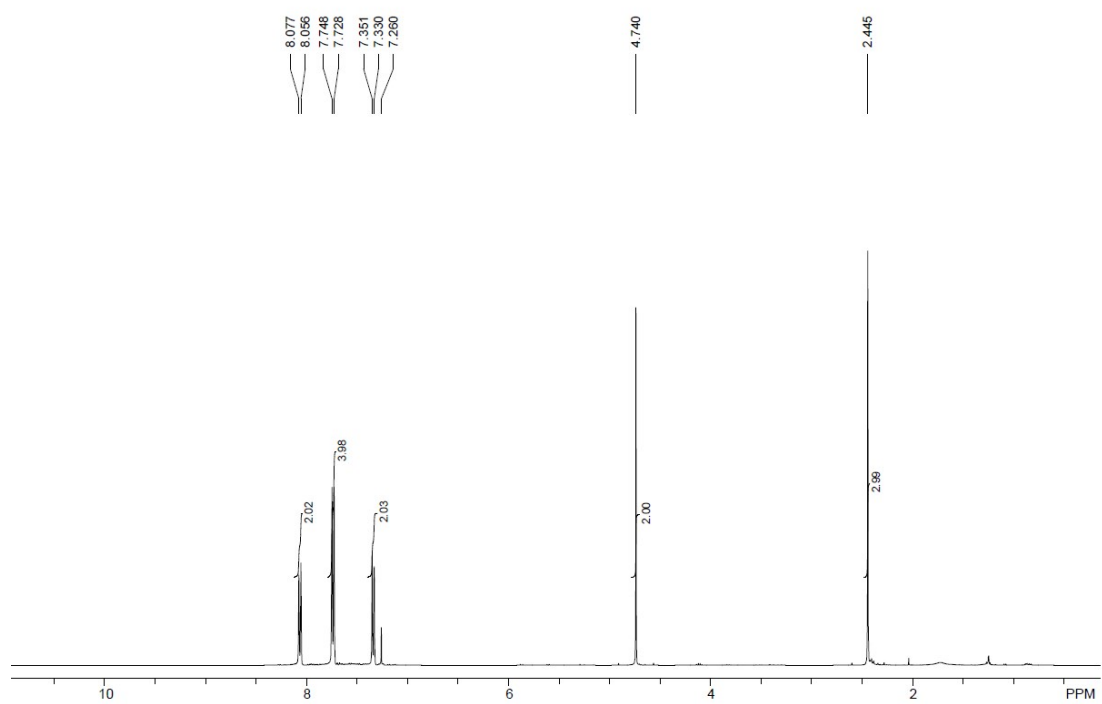

<sup>1</sup>H spectra of 3ma

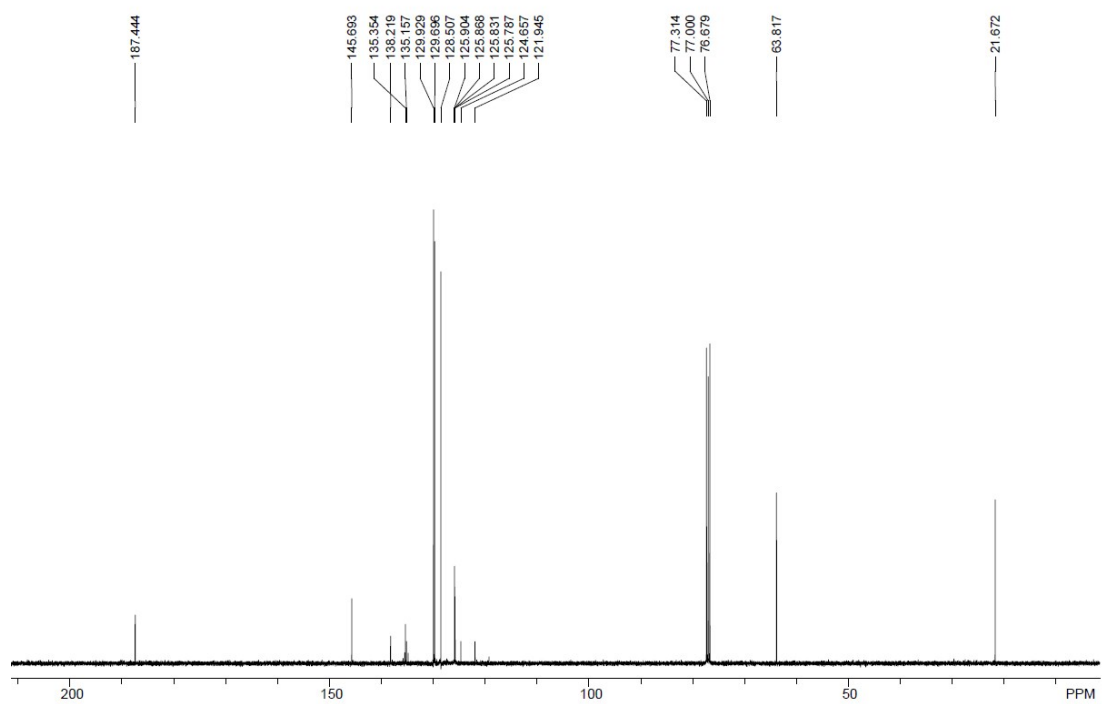

<sup>13</sup>C spectra of 3ma

1-(4-nitrophenyl)-2-tosylethan-1-one (3na)

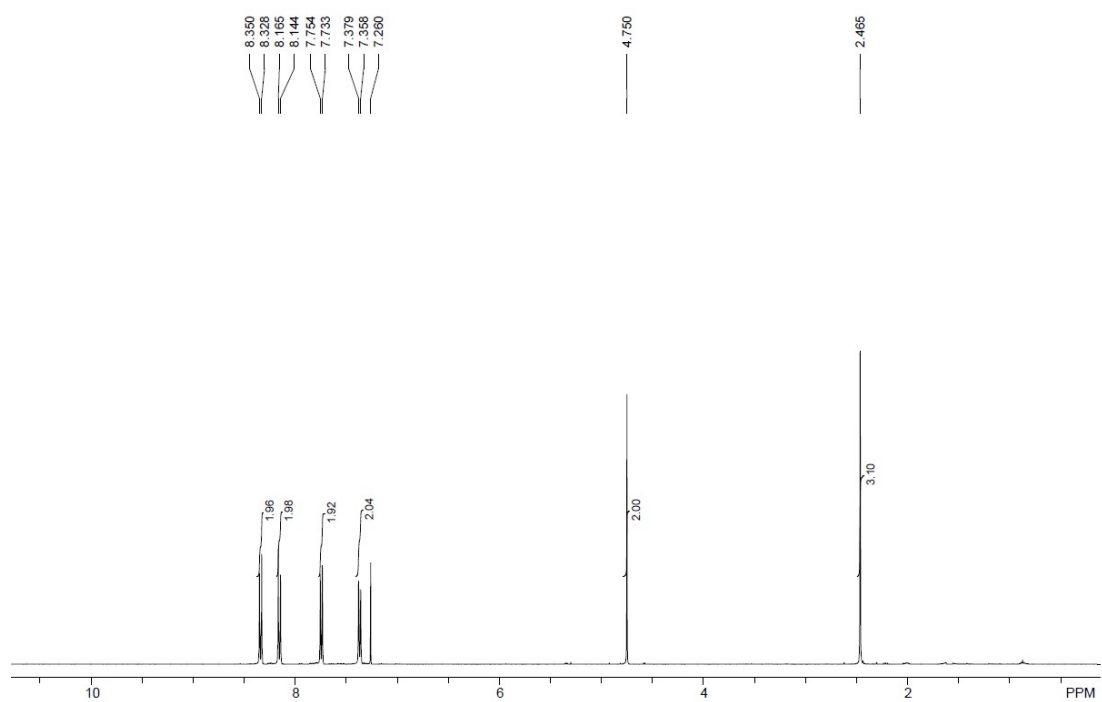

<sup>1</sup>H spectra of 3na

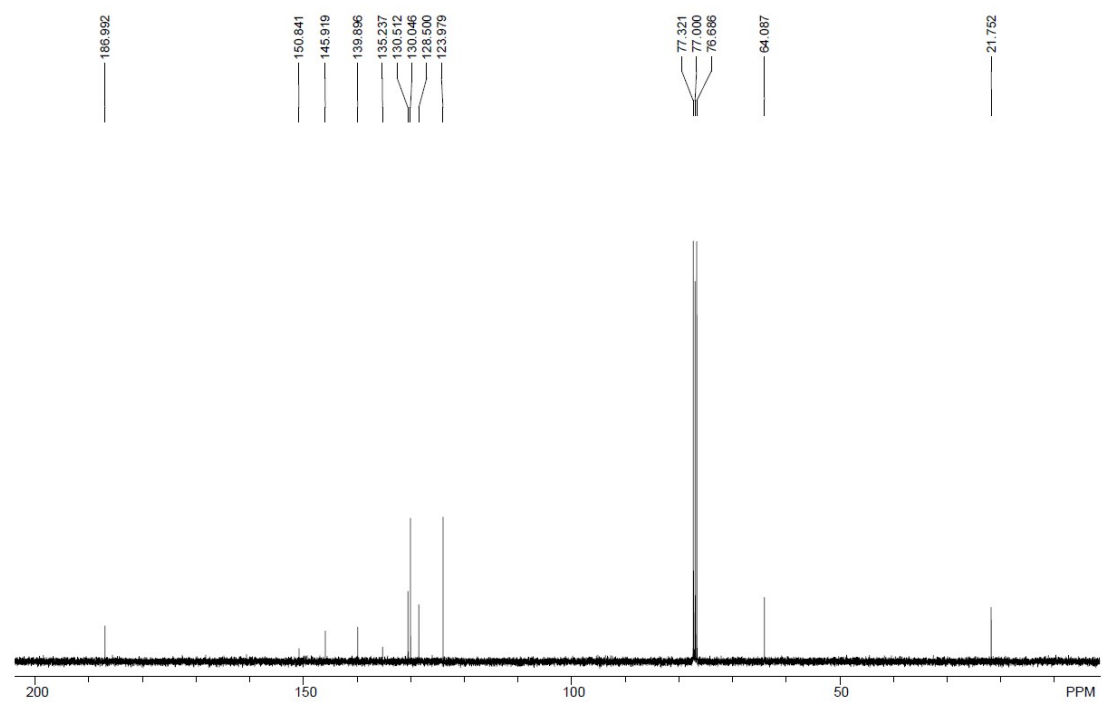

<sup>13</sup>C spectra of 3na



1-(2,3-dihydrobenzofuran-5-yl)-2-tosylethan-1-one (30a)

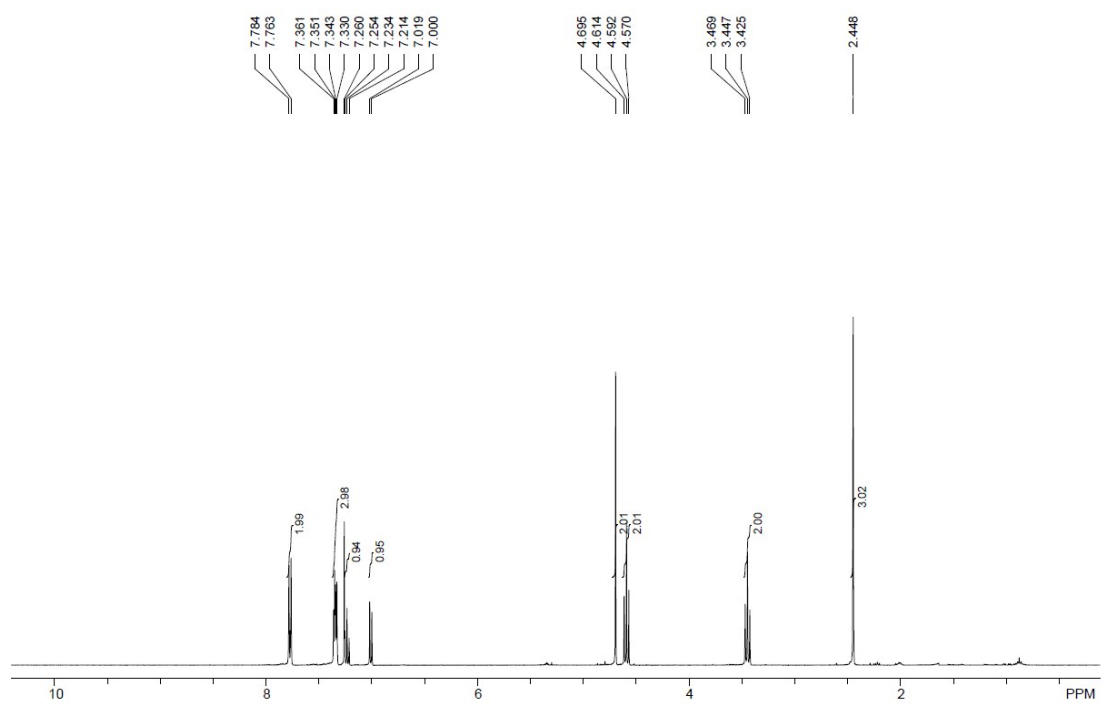

<sup>1</sup>H spectra of 30a

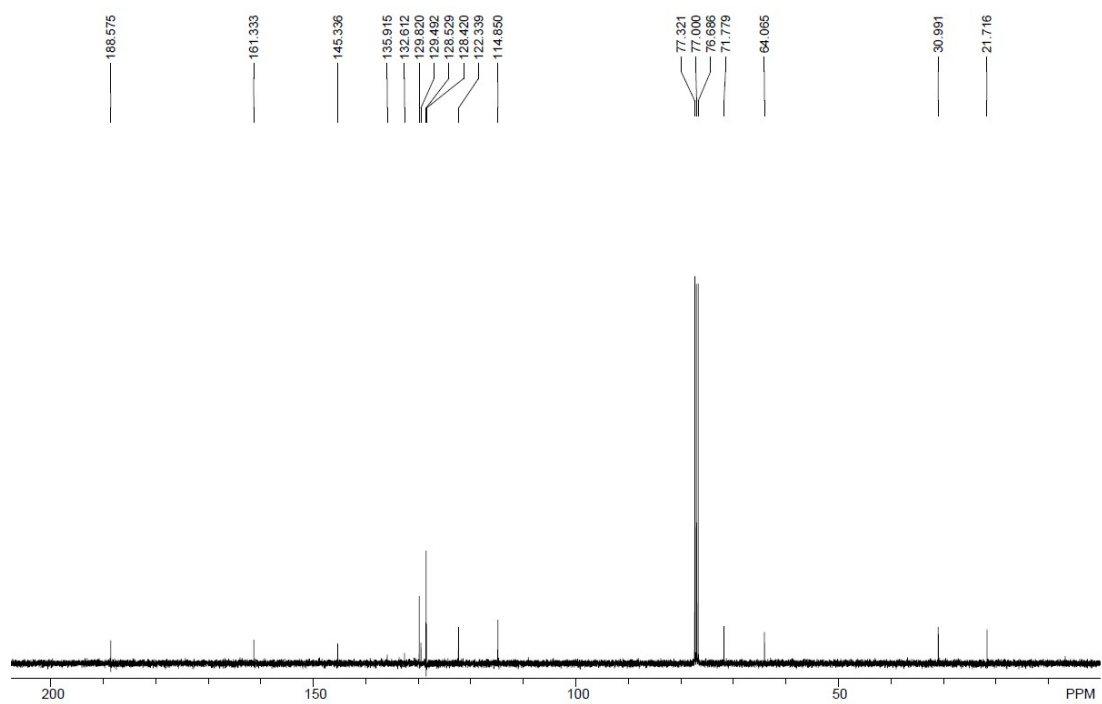

<sup>13</sup>C spectra of 30a

2-(2-tosylethyl)pyridine (3pa)

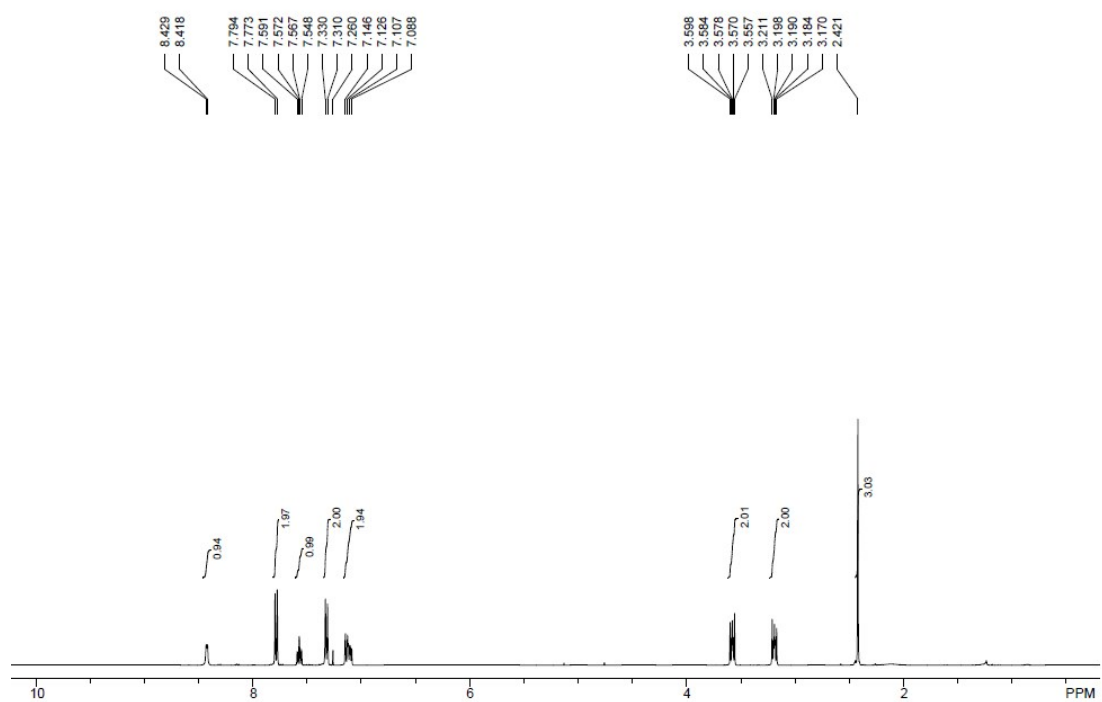

<sup>1</sup>H spectra of 3pa

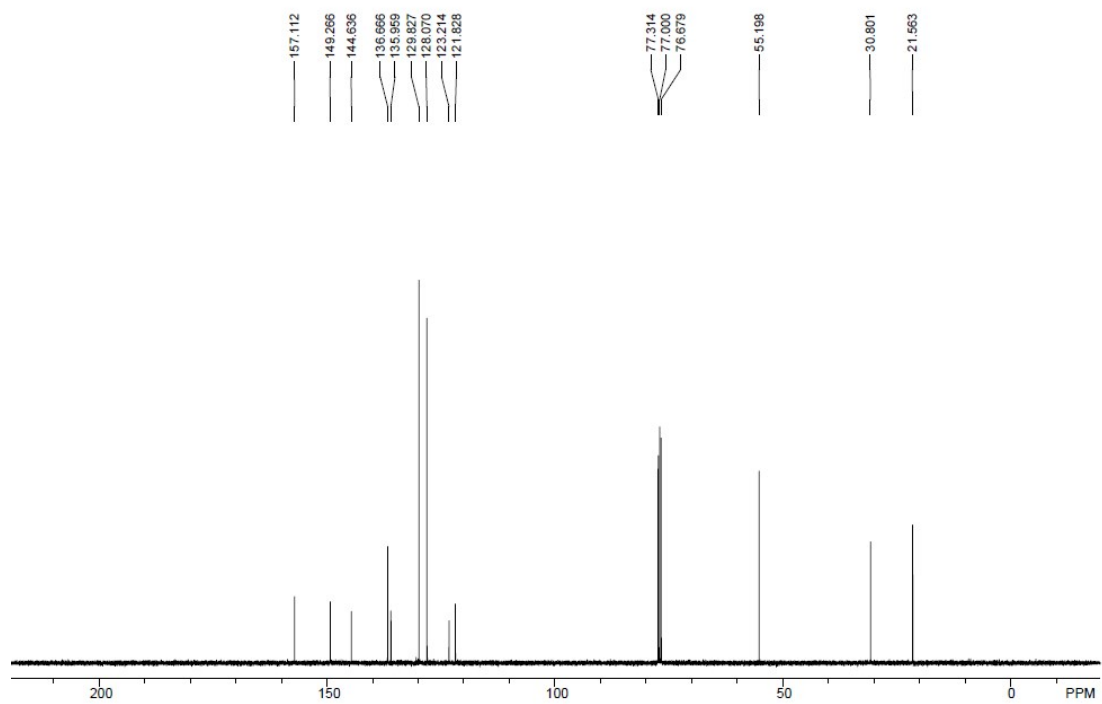

<sup>13</sup>C spectra of 3pa

4-(2-tosylethyl)pyridine (3qa)

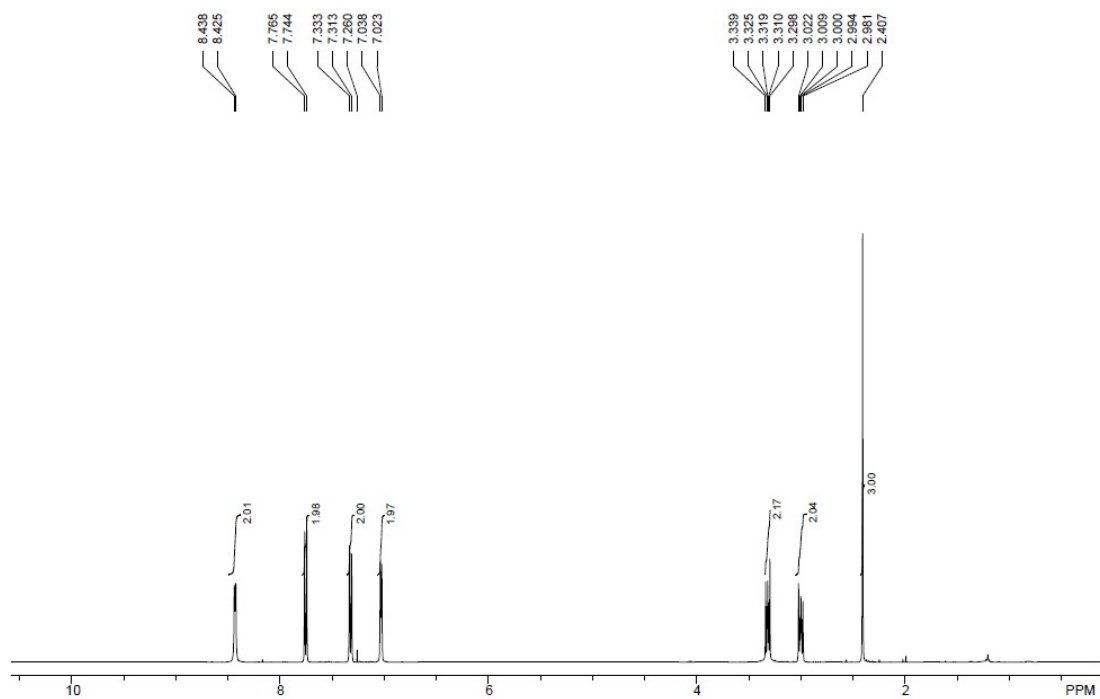

<sup>1</sup>H spectra of 3qa

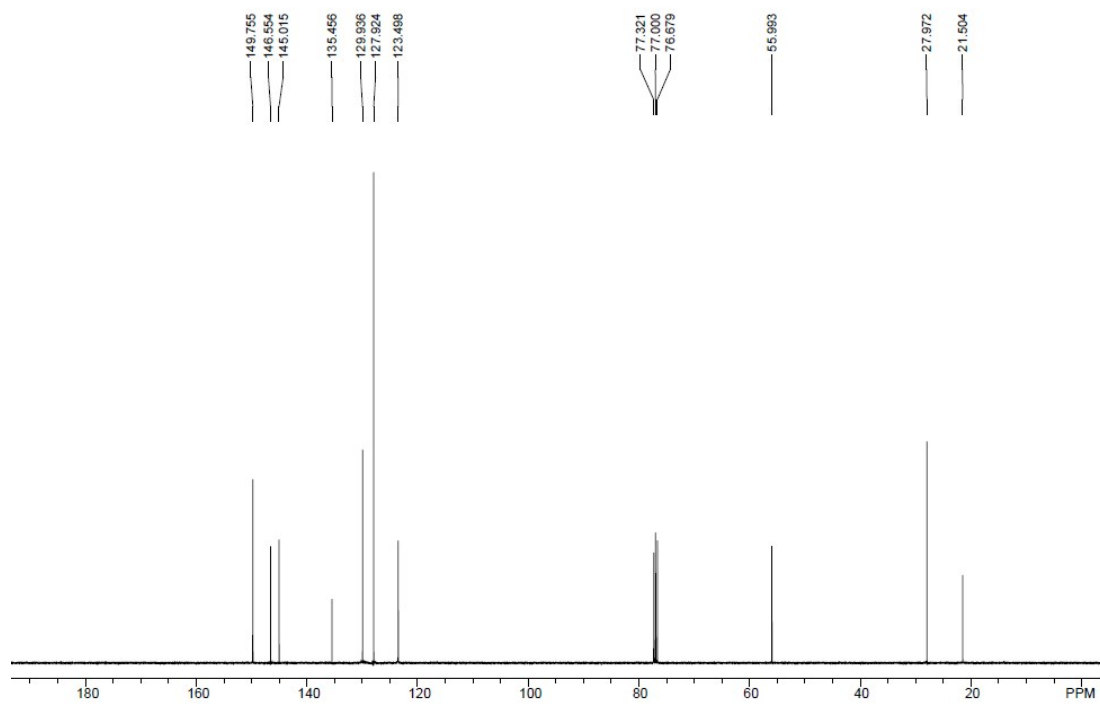

<sup>13</sup>C spectra of 3qa

2-tosyl-2,3-dihydro-1H-inden-1-one (3sa)

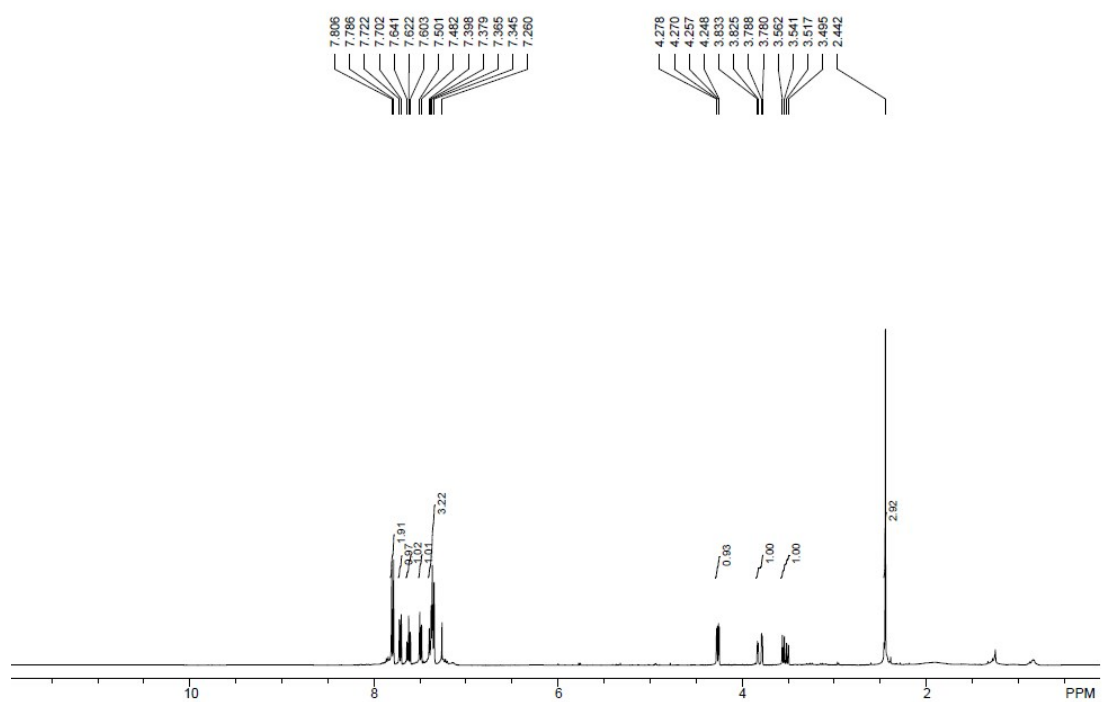

<sup>1</sup>H spectra of 3sa

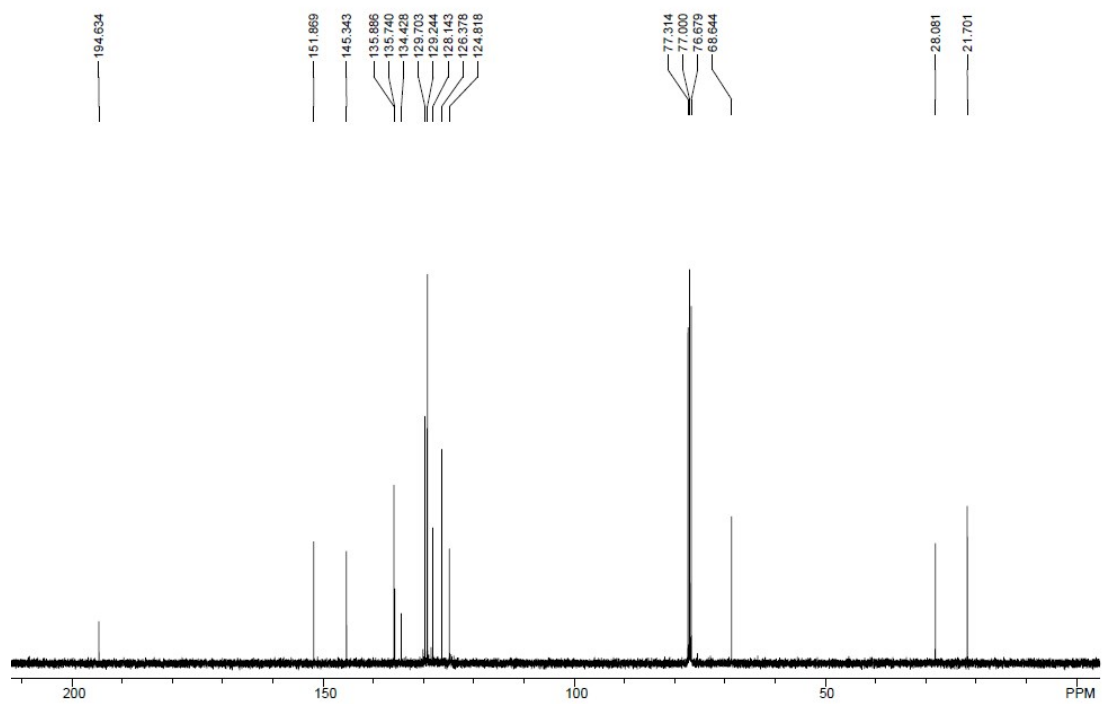

<sup>13</sup>C spectra of 3sa

3,7-dimethyloct-6-en-1-yl 4-(2-tosylacetyl)benzoate (3va)

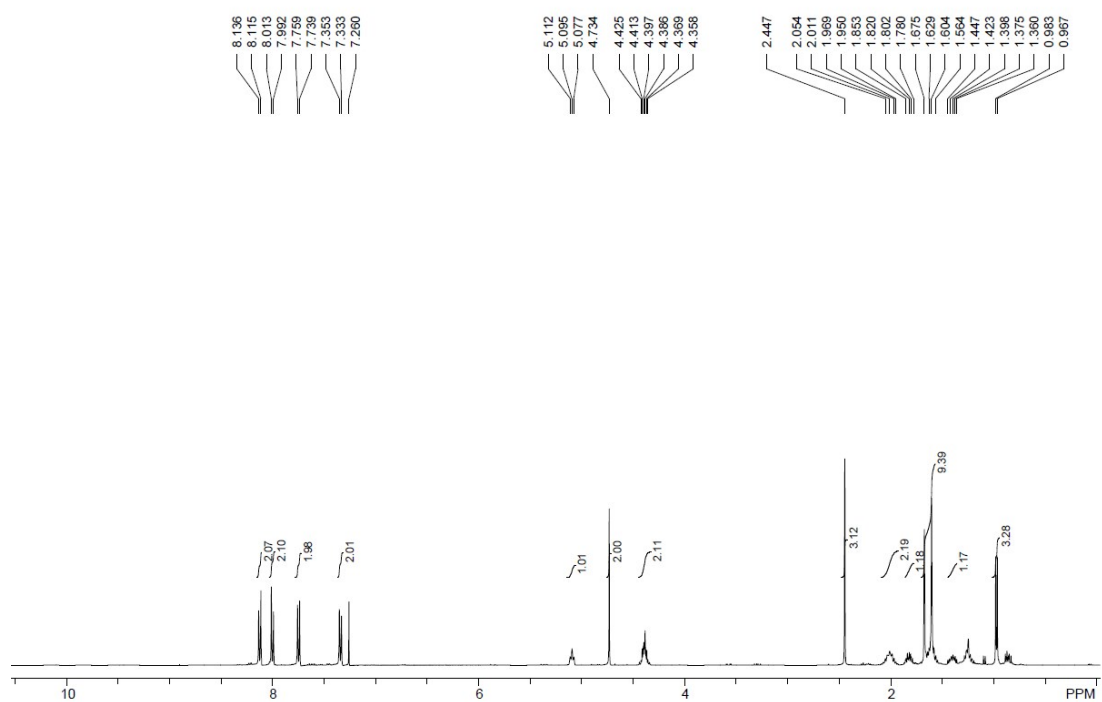

<sup>1</sup>H spectra of 3va

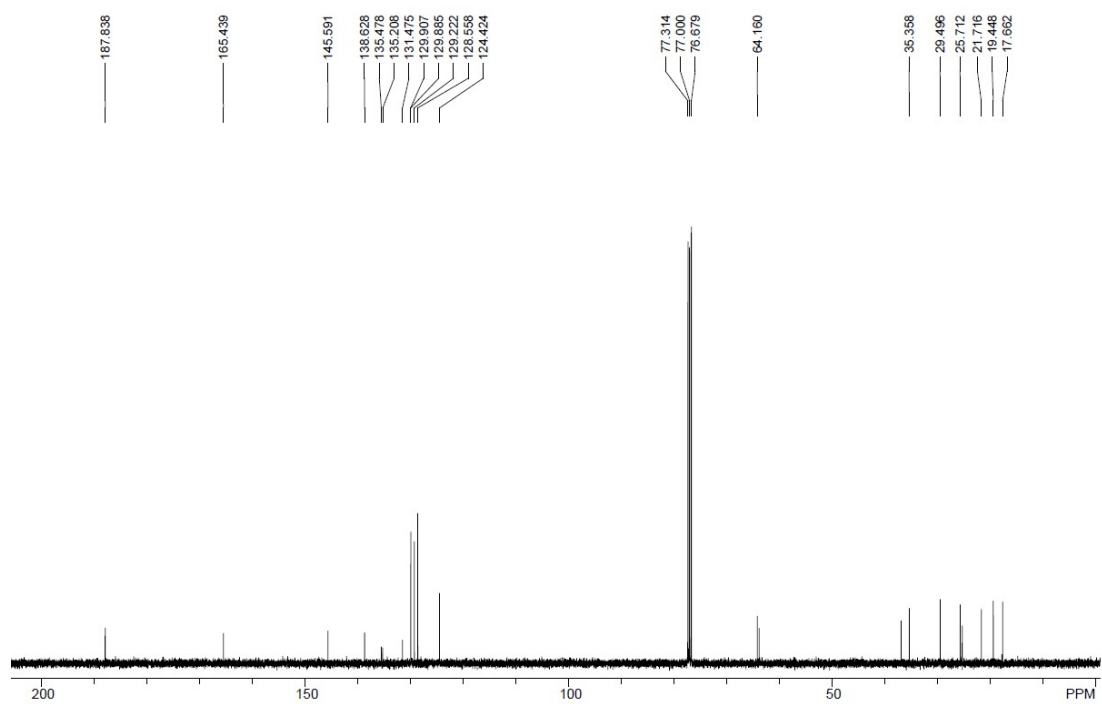

<sup>13</sup>C spectra of 3va

1-phenyl-2-(phenylsulfonyl)ethan-1-one (3ab)

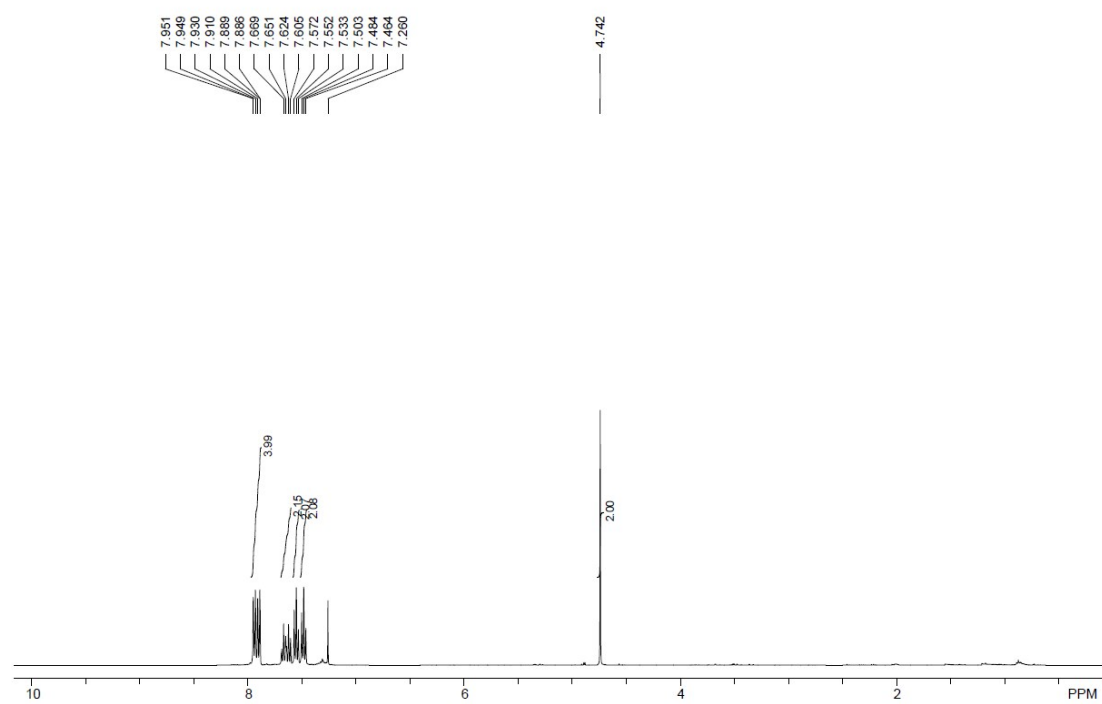

<sup>1</sup>H spectra of 3ab

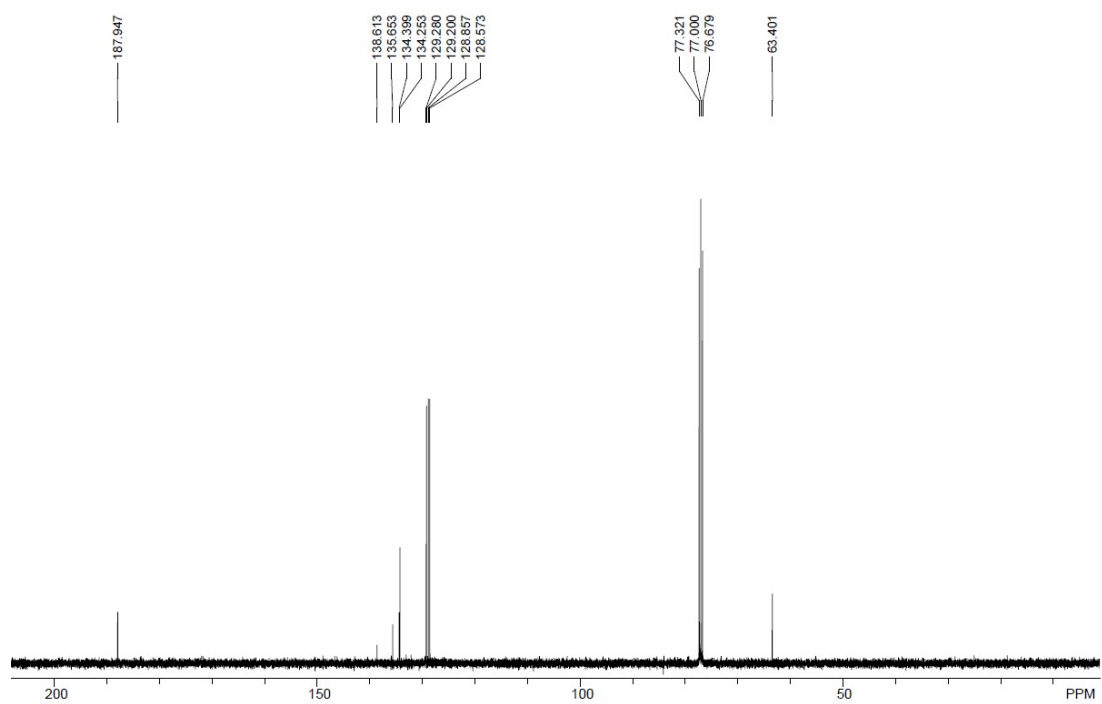

<sup>13</sup>C spectra of 3ab

2-((4-methoxyphenyl)sulfonyl)-1-phenylethan-1-one (3ac)

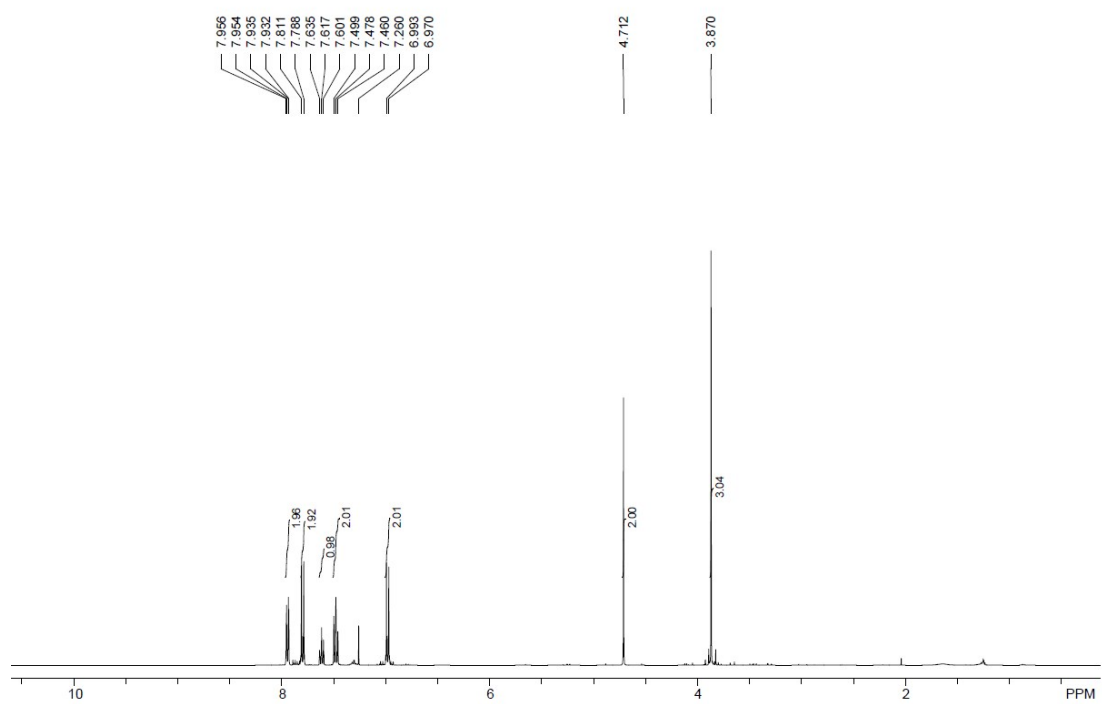

<sup>1</sup>H spectra of 3ac

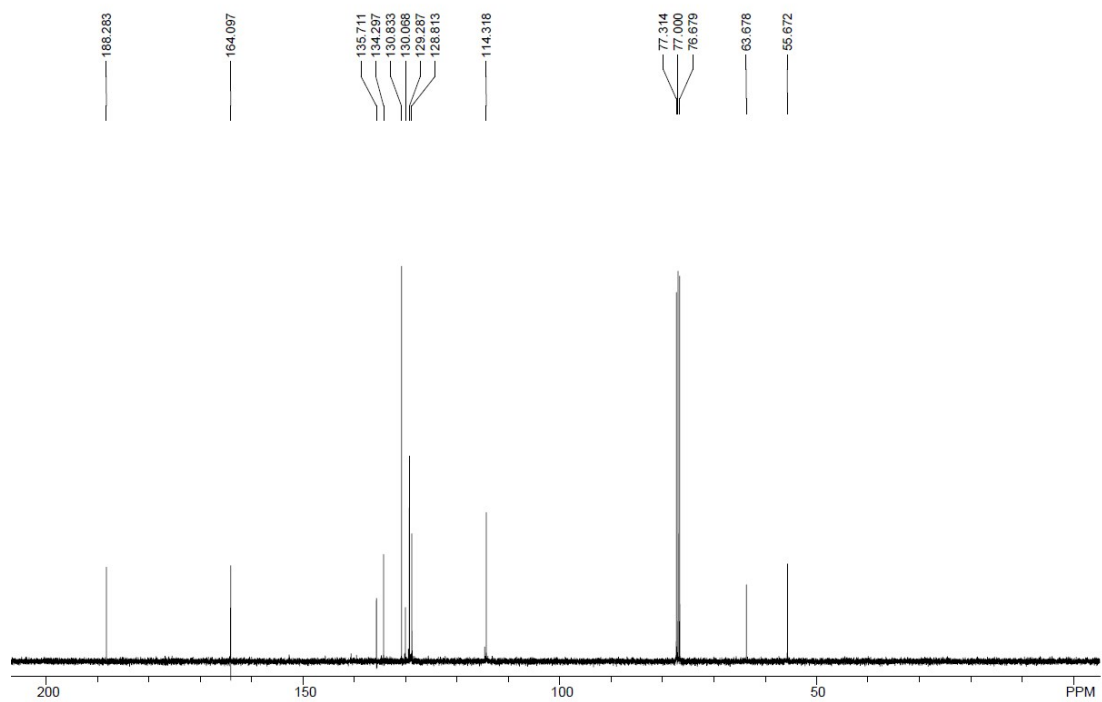

<sup>13</sup>C spectra of 3ac

2-((4-fluorophenyl)sulfonyl)-1-phenylethan-1-one (3ad)

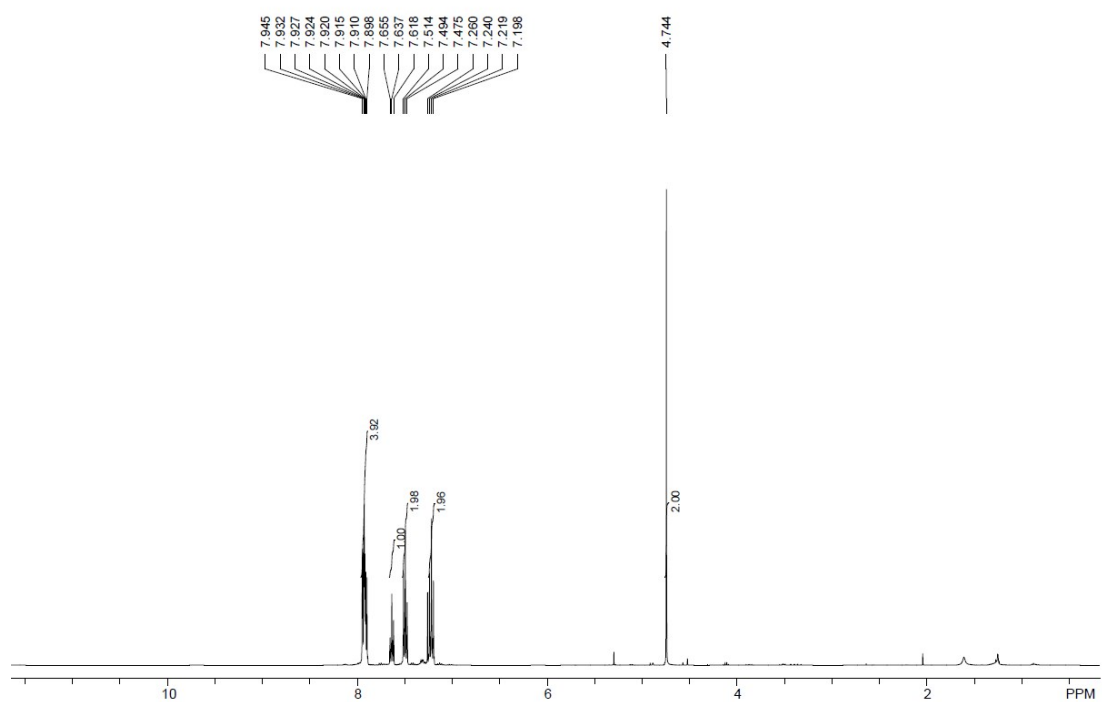

<sup>1</sup>H spectra of 3ad

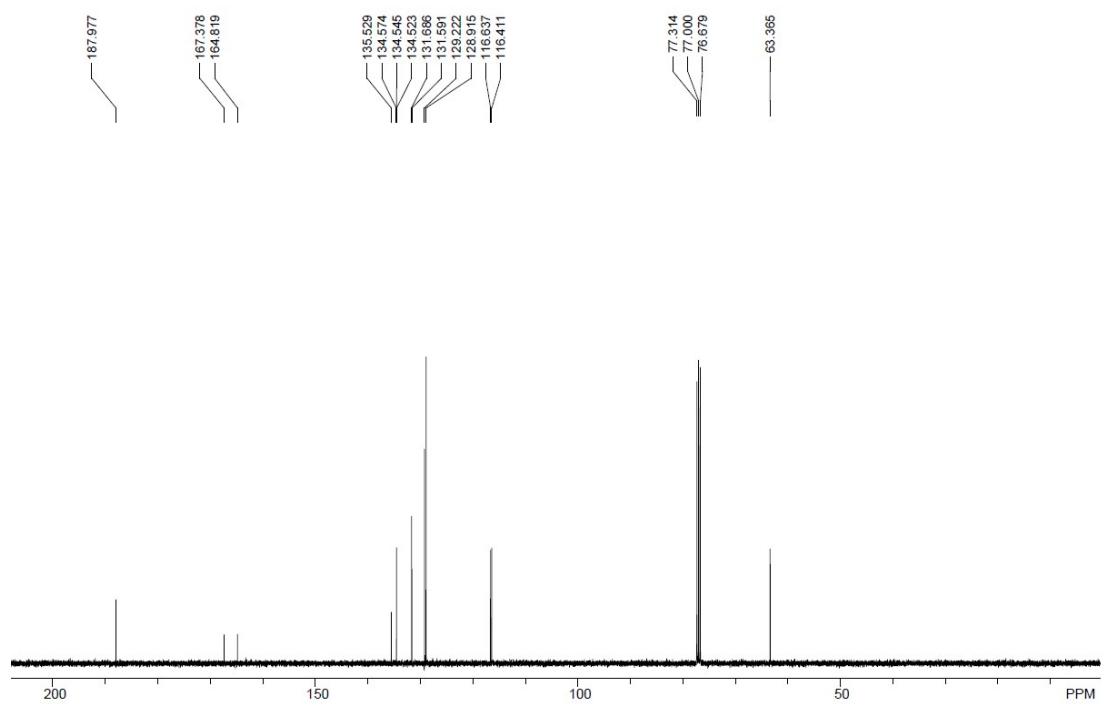

<sup>13</sup>C spectra of 3ad



2-((4-chlorophenyl)sulfonyl)-1-phenylethan-1-one (3ae)

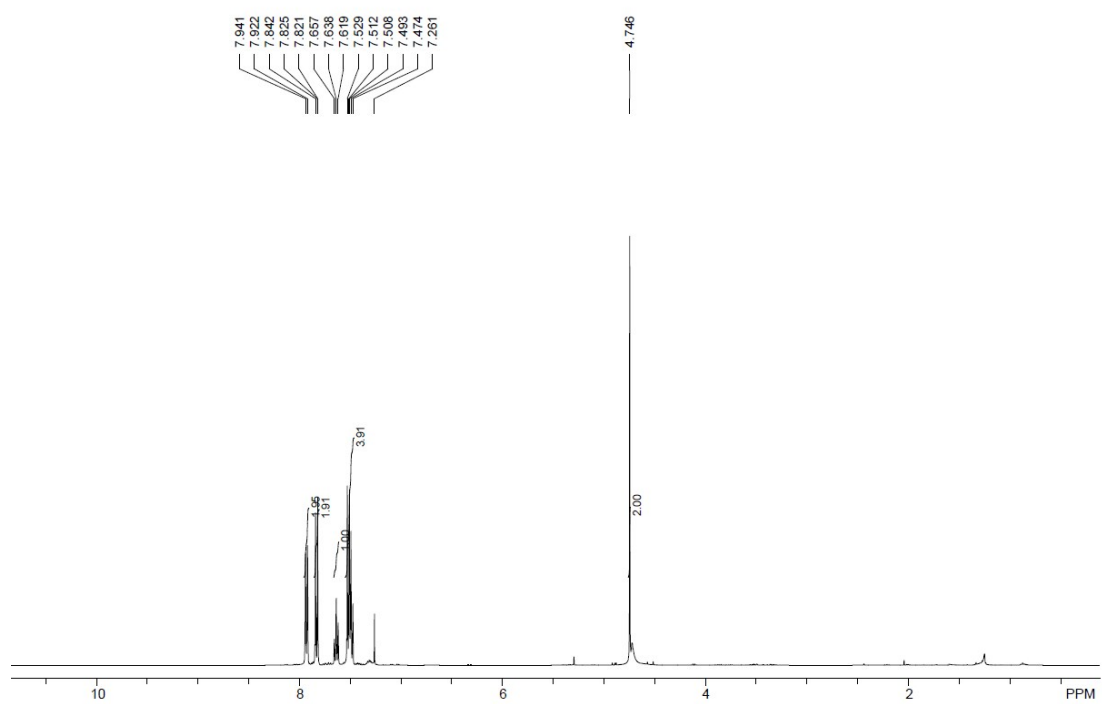

<sup>1</sup>H spectra of 3ae

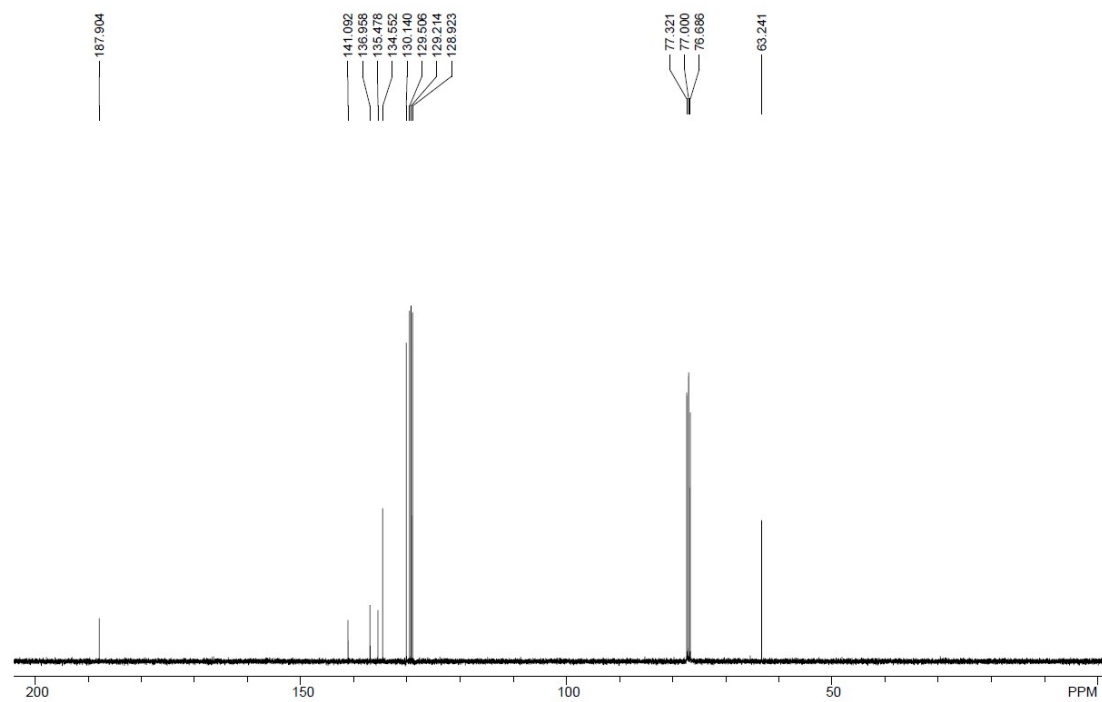

<sup>13</sup>C spectra of 3ae

2-((4-bromophenyl)sulfonyl)-1-phenylethan-1-one (3af)

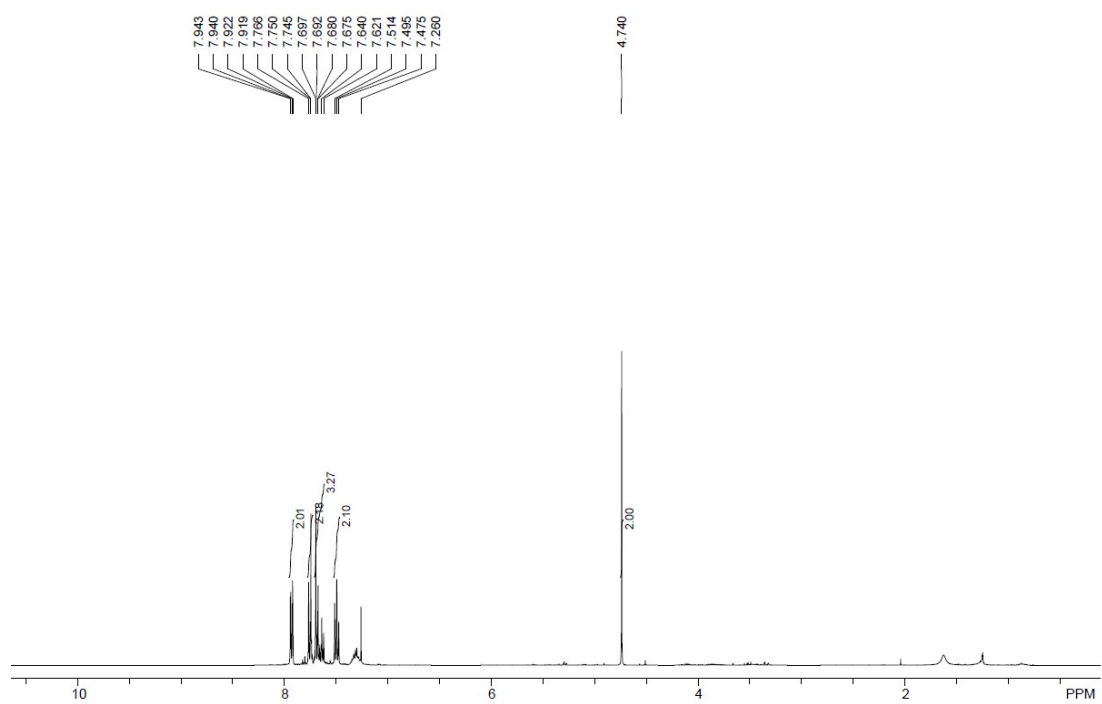

<sup>1</sup>H spectra of 3af

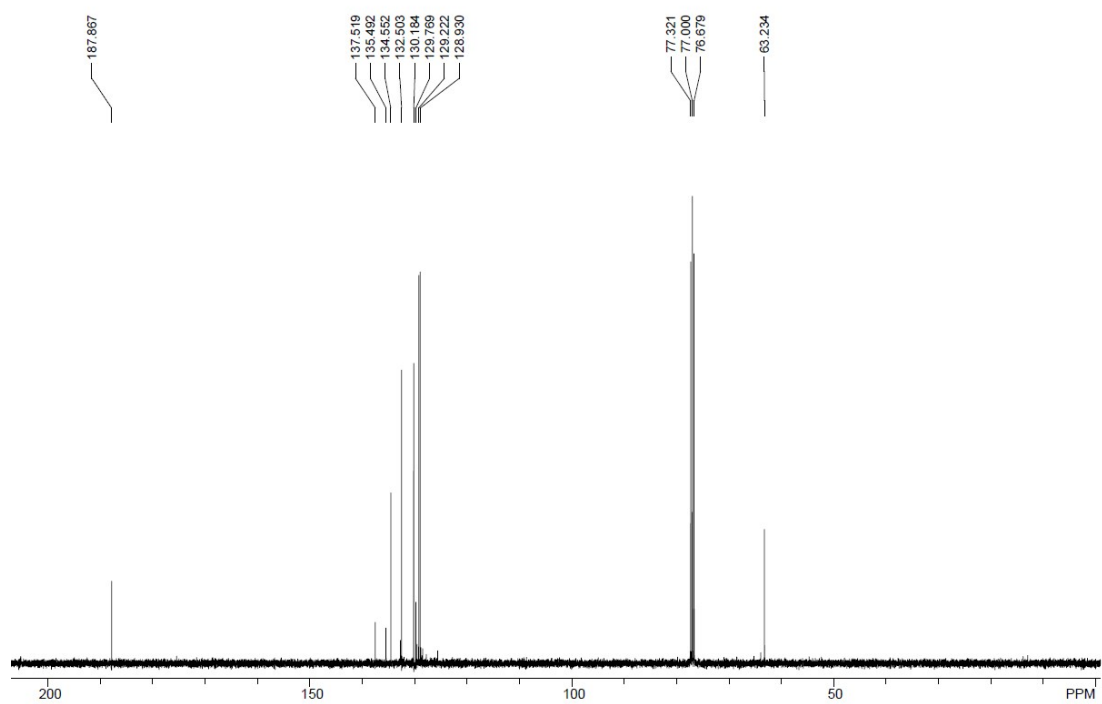

<sup>13</sup>C spectra of 3af

phenyl-2-((4-(trifluoromethyl)phenyl)sulfonyl)ethan-1-one (3ag)

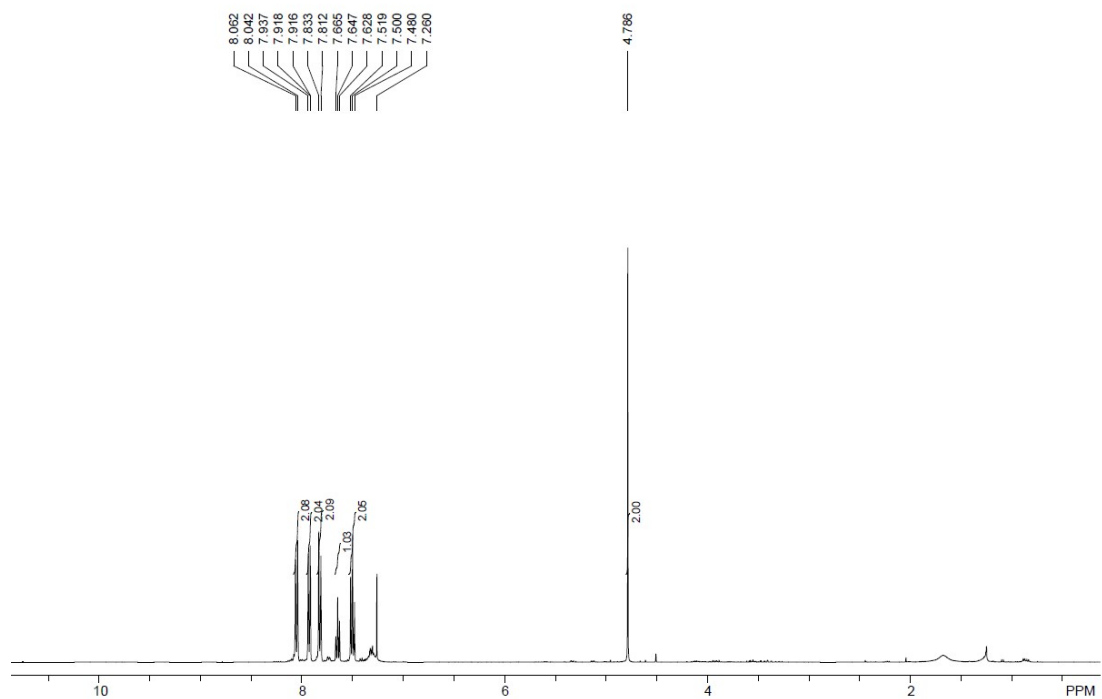

<sup>1</sup>H spectra of 3ag

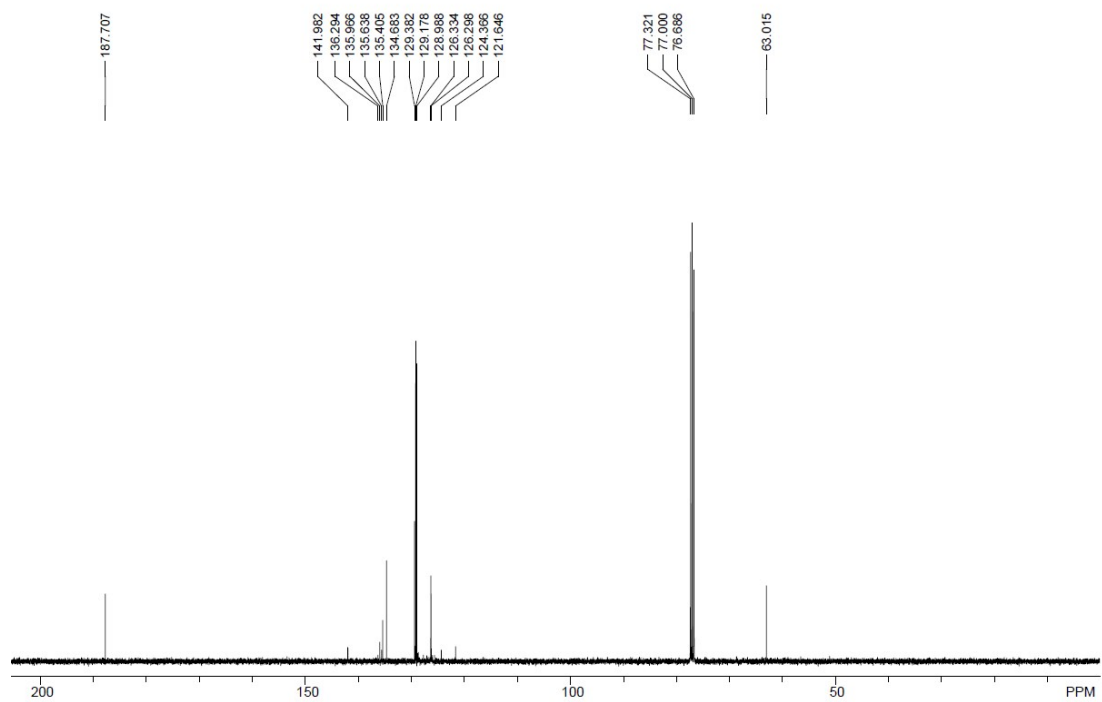

<sup>13</sup>C spectra of 3ag

4-((2-oxo-2-phenylethyl)sulfonyl)benzotrile (3ah)

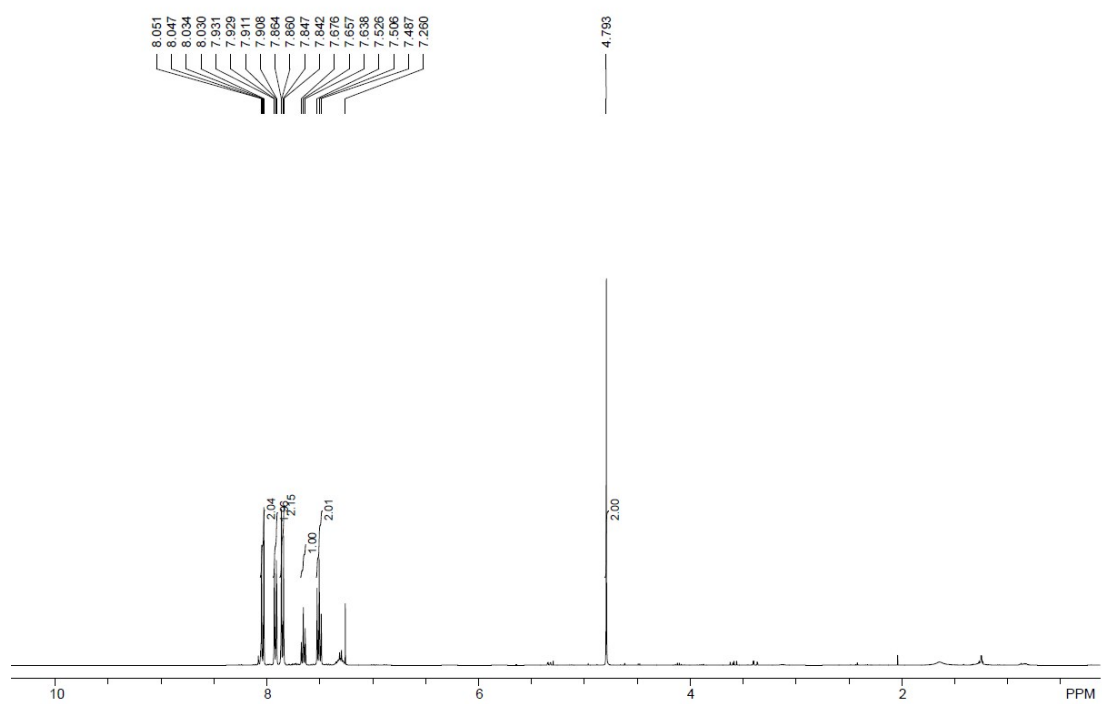

<sup>1</sup>H spectra of 3ah

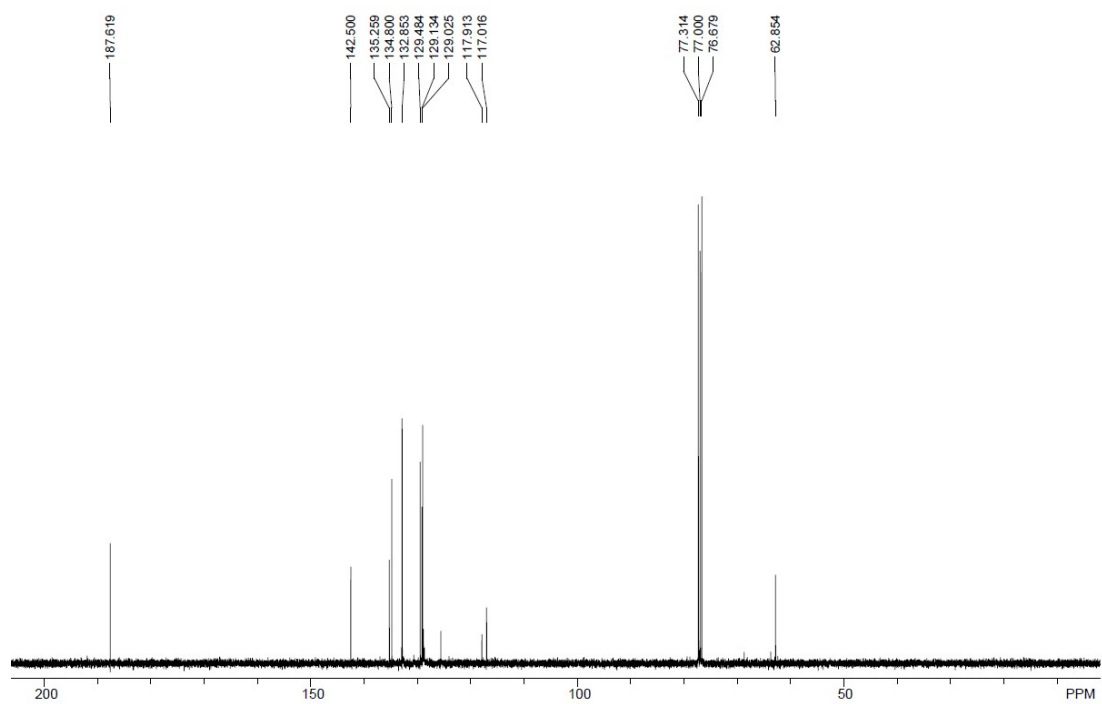

<sup>13</sup>C spectra of 3ah

1-phenyl-2-(o-tolylsulfonyl)ethan-1-one (3ai)

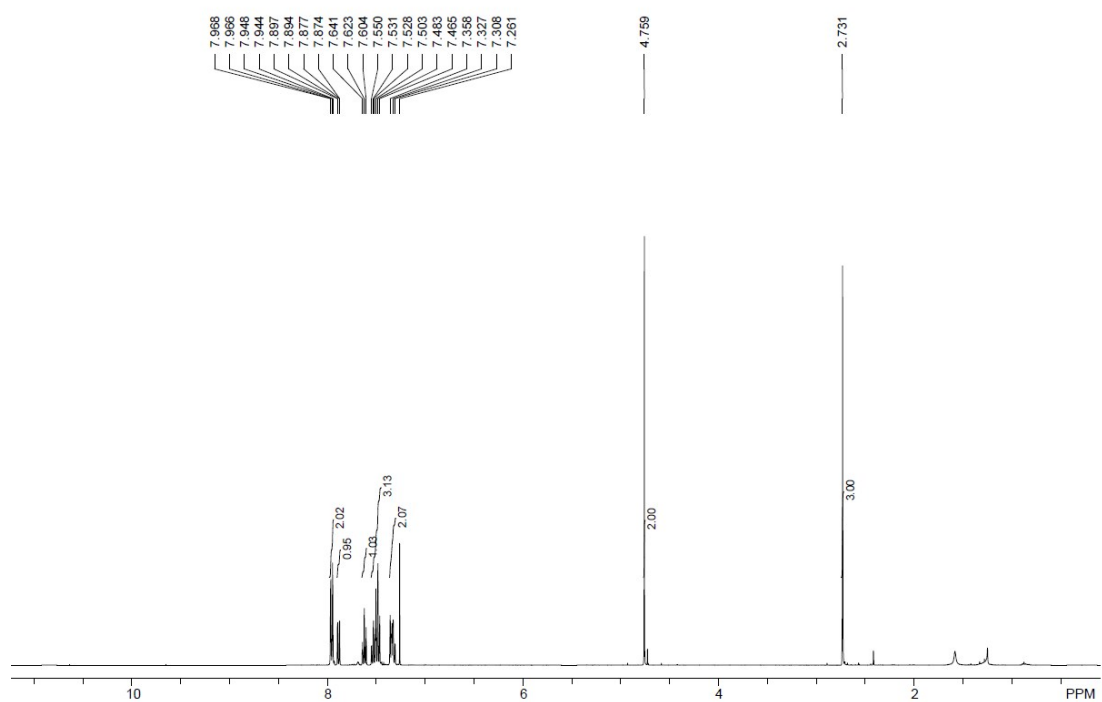

<sup>1</sup>H spectra of 3ai

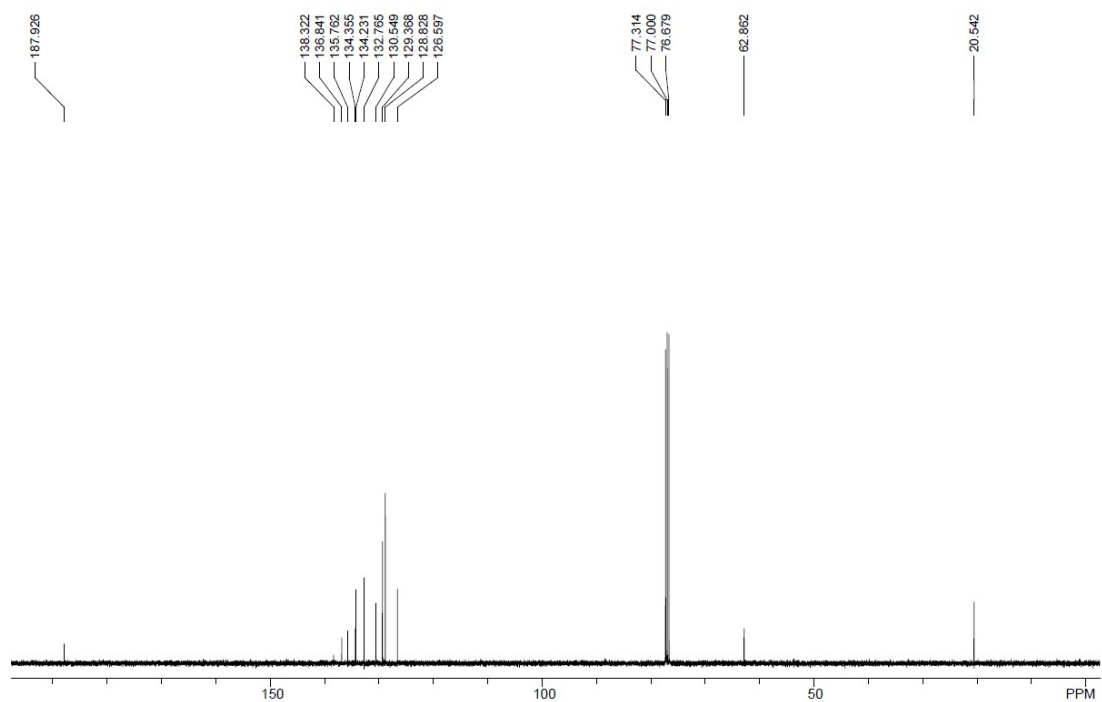

<sup>13</sup>C spectra of 3ai

2-((2-chlorophenyl)sulfonyl)-1-phenylethan-1-one (3aj)

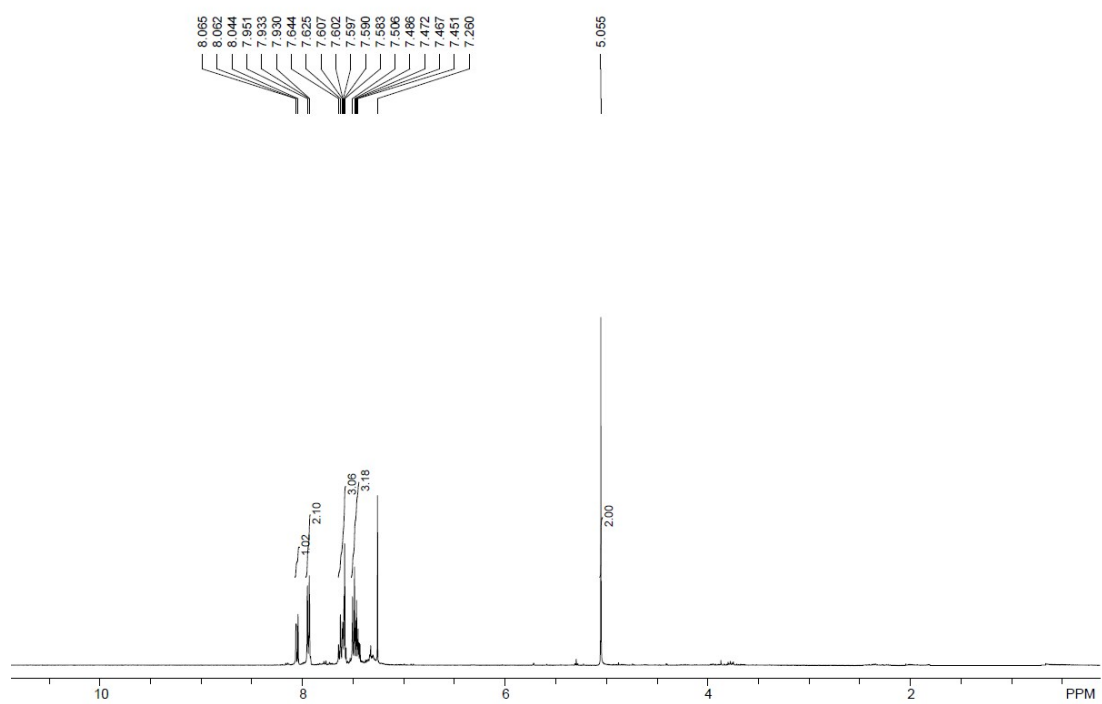

<sup>1</sup>H spectra of 3aj

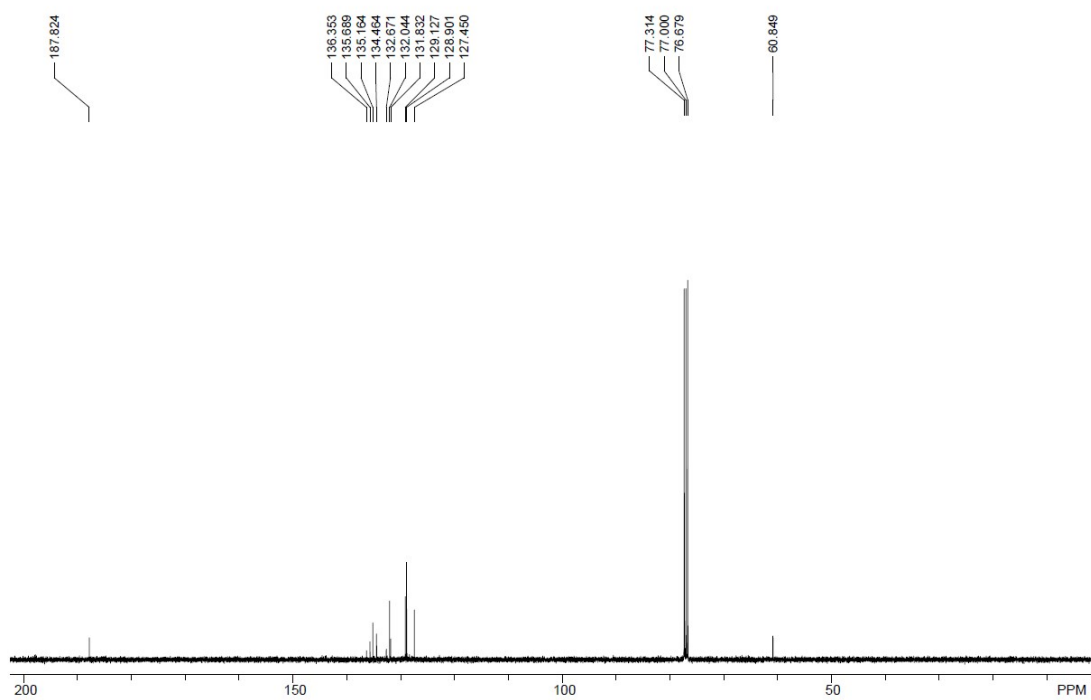

<sup>13</sup>C spectra of 3aj

1-phenyl-2-(m-tolylsulfonyl)ethan-1-one (**3ak**)

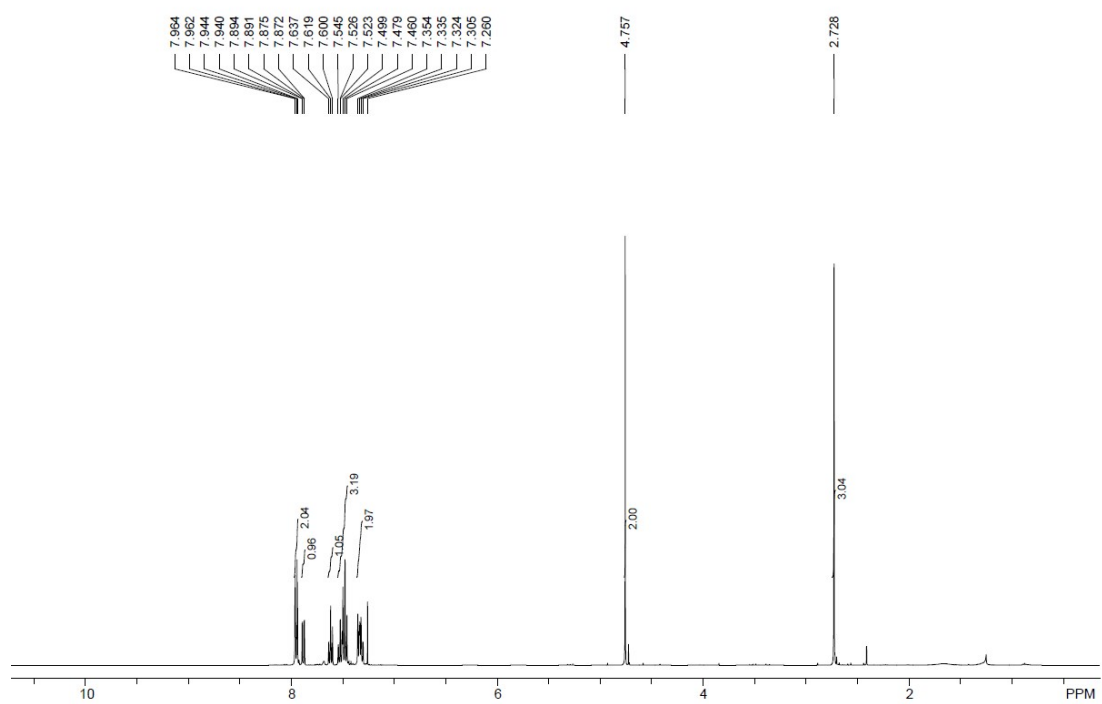

<sup>1</sup>H spectra of **3ak**

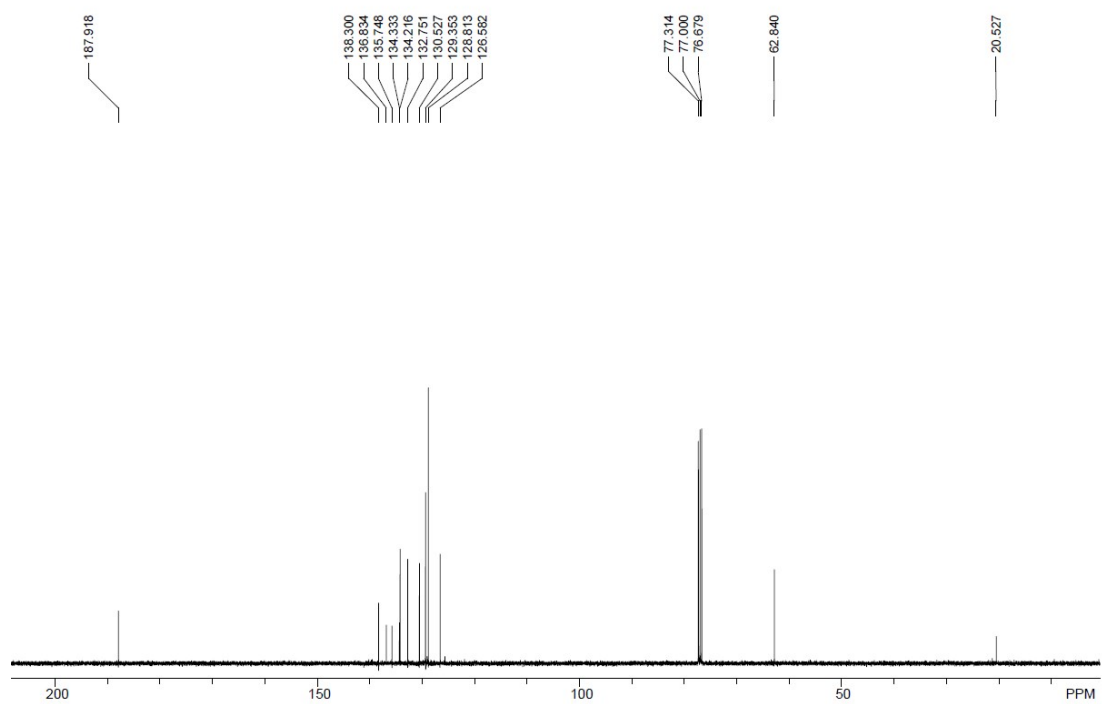

<sup>13</sup>C spectra of **3ak**

2-((3-bromophenyl)sulfonyl)-1-phenylethan-1-one (3al)

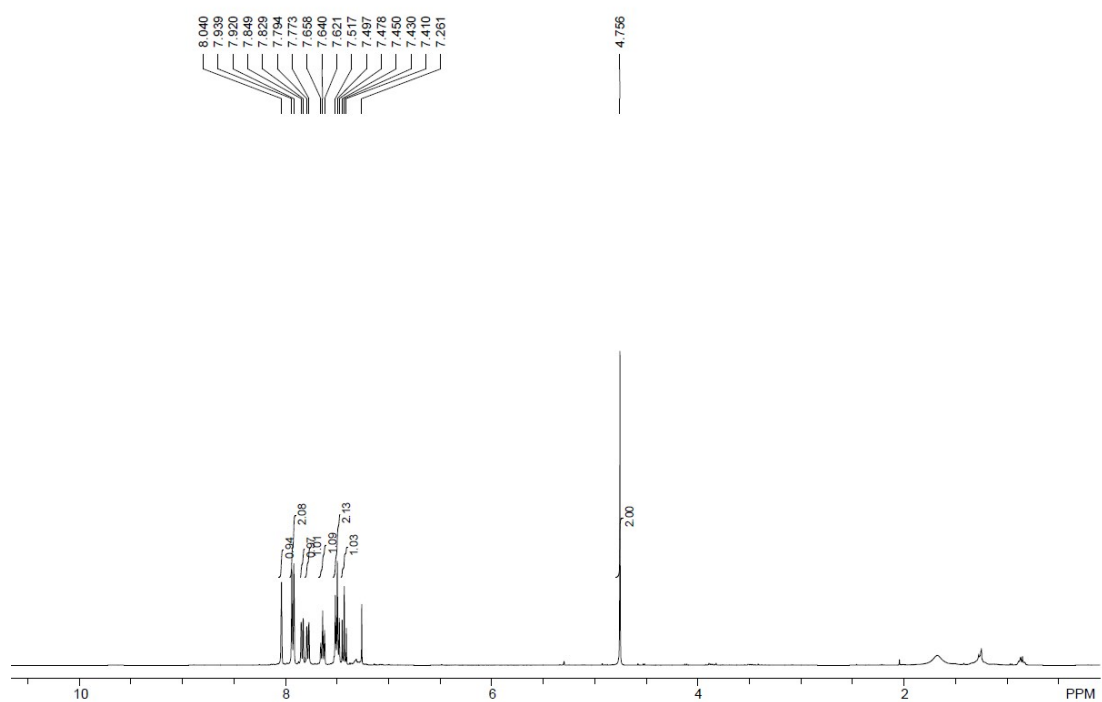

<sup>1</sup>H spectra of 3al

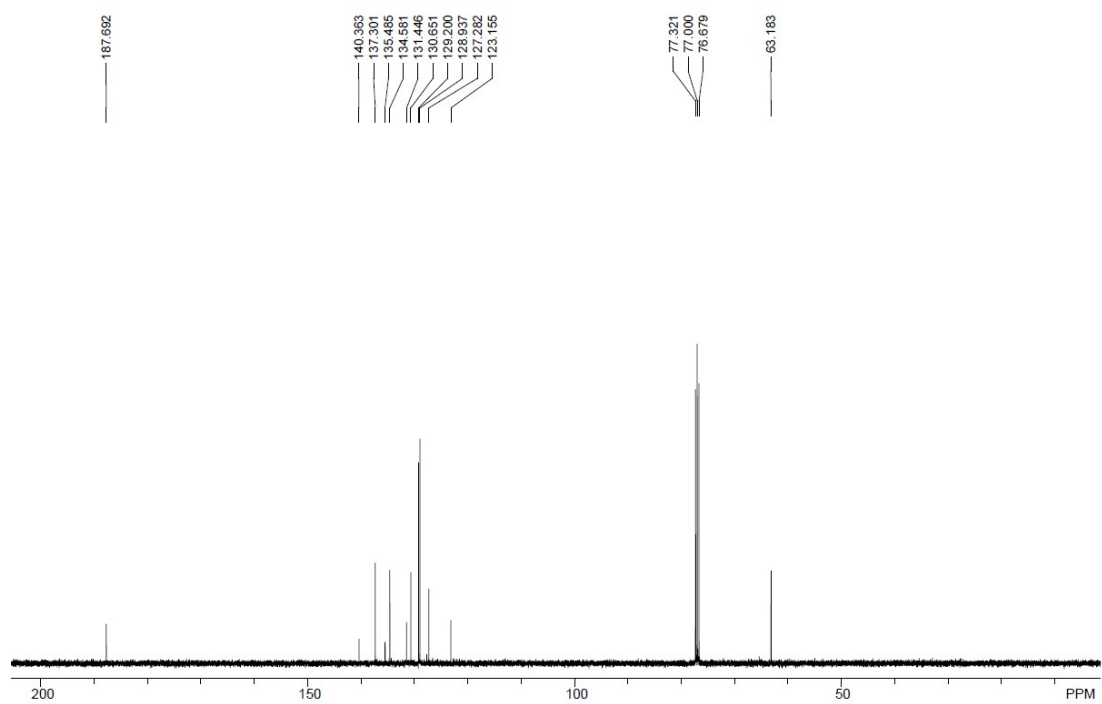

<sup>13</sup>C spectra of 3al



2-((3-chloro-4-fluorophenyl)sulfonyl)-1-phenylethan-1-one (3am)

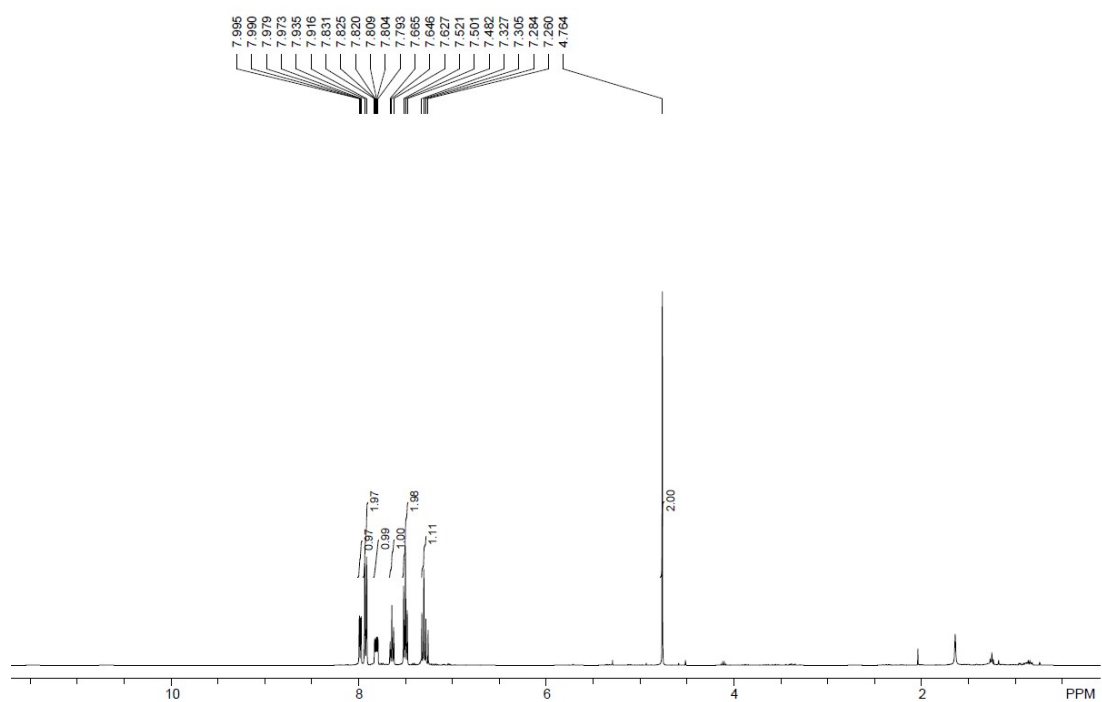

<sup>1</sup>H spectra of 3am

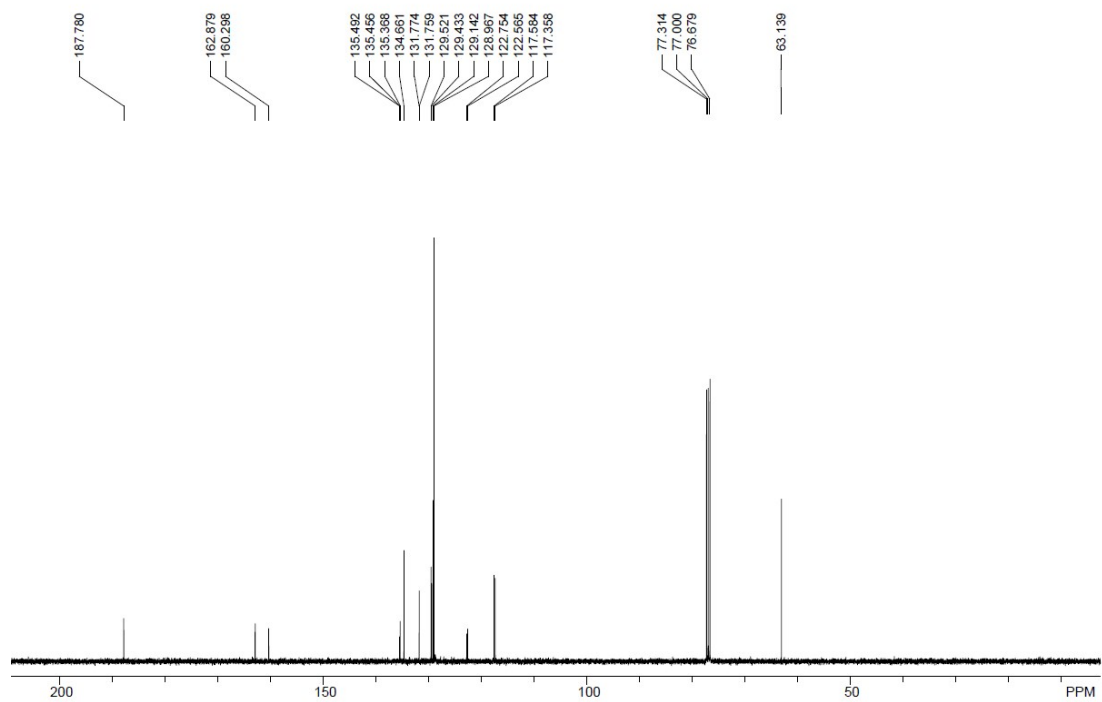

<sup>13</sup>C spectra of 3am

phenyl-2-(thiophen-2-ylsulfonyl)ethanone (3an)

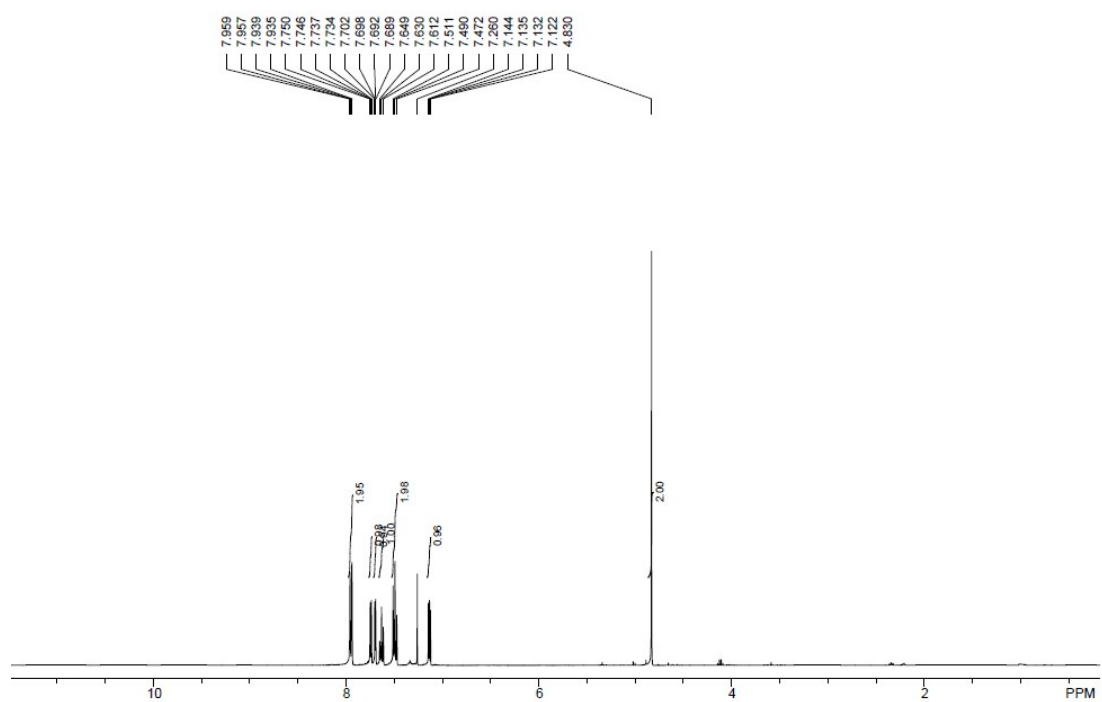

<sup>1</sup>H spectra of 3an

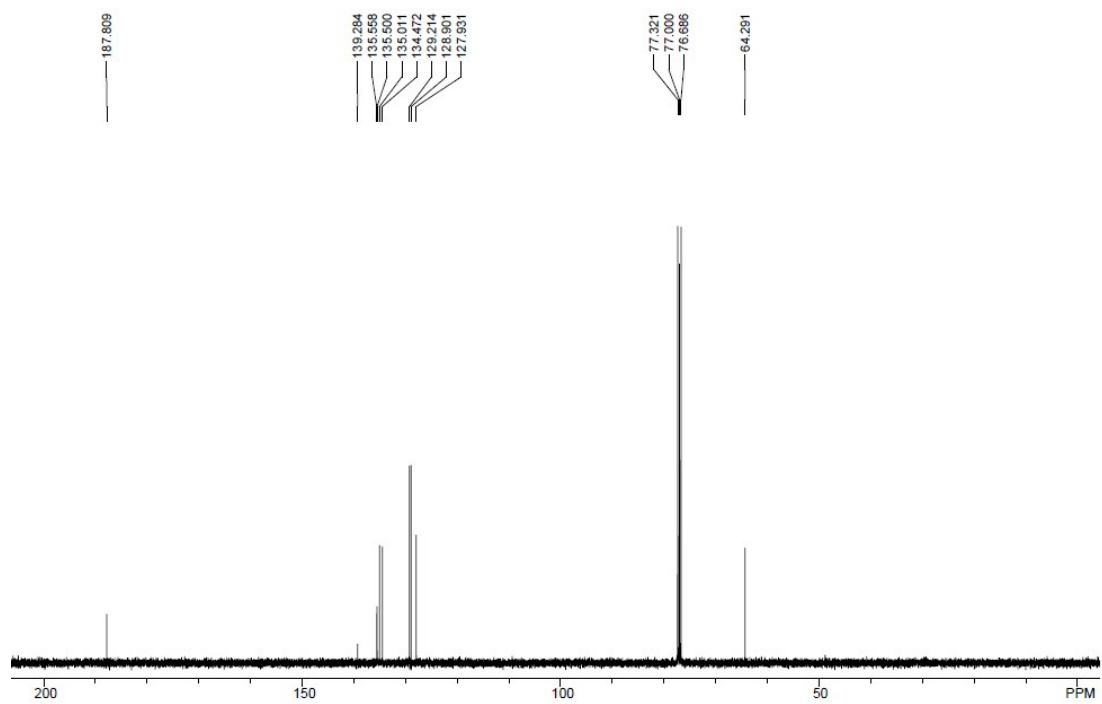

<sup>13</sup>C spectra of 3an

2-(methylsulfonyl)-1-phenylethanone (**3ao**)

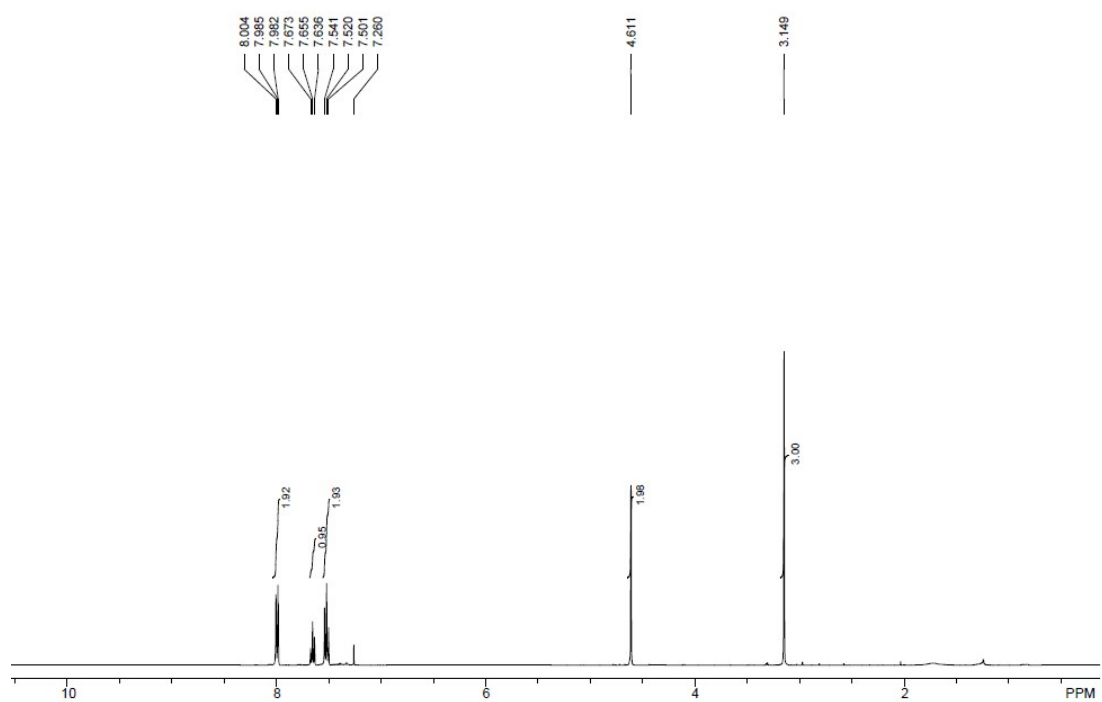

<sup>1</sup>H spectra of **3ao**

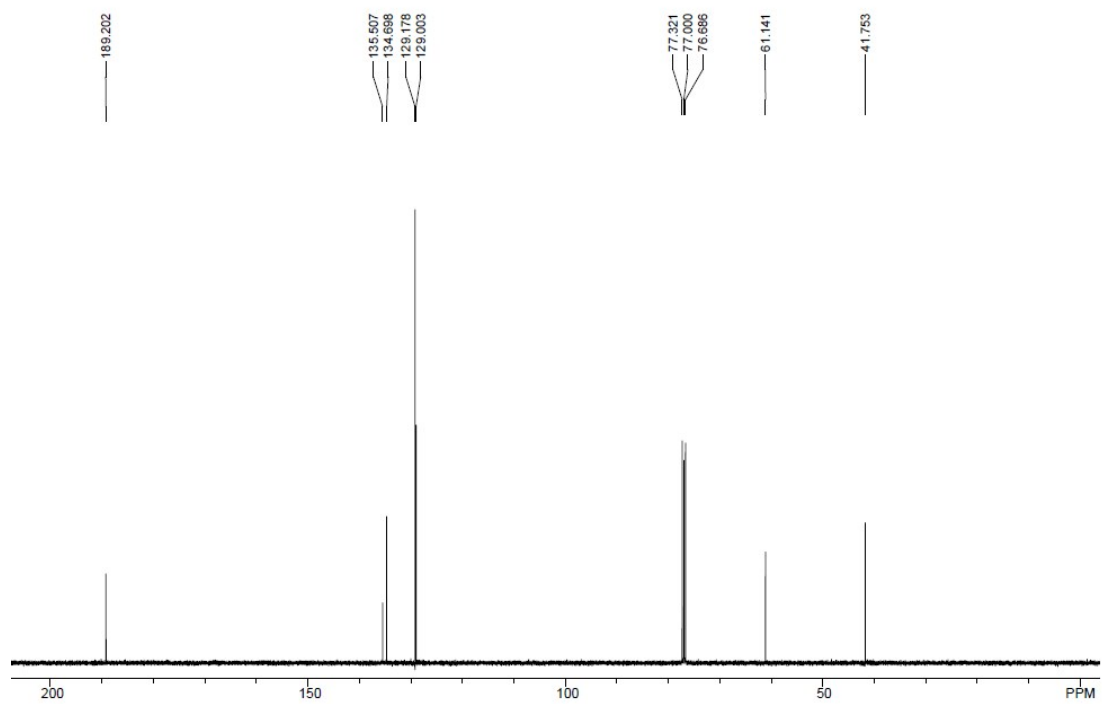

<sup>13</sup>C spectra of **3ao**

phenyl-2-(propylsulfonyl)ethanone (3ap)

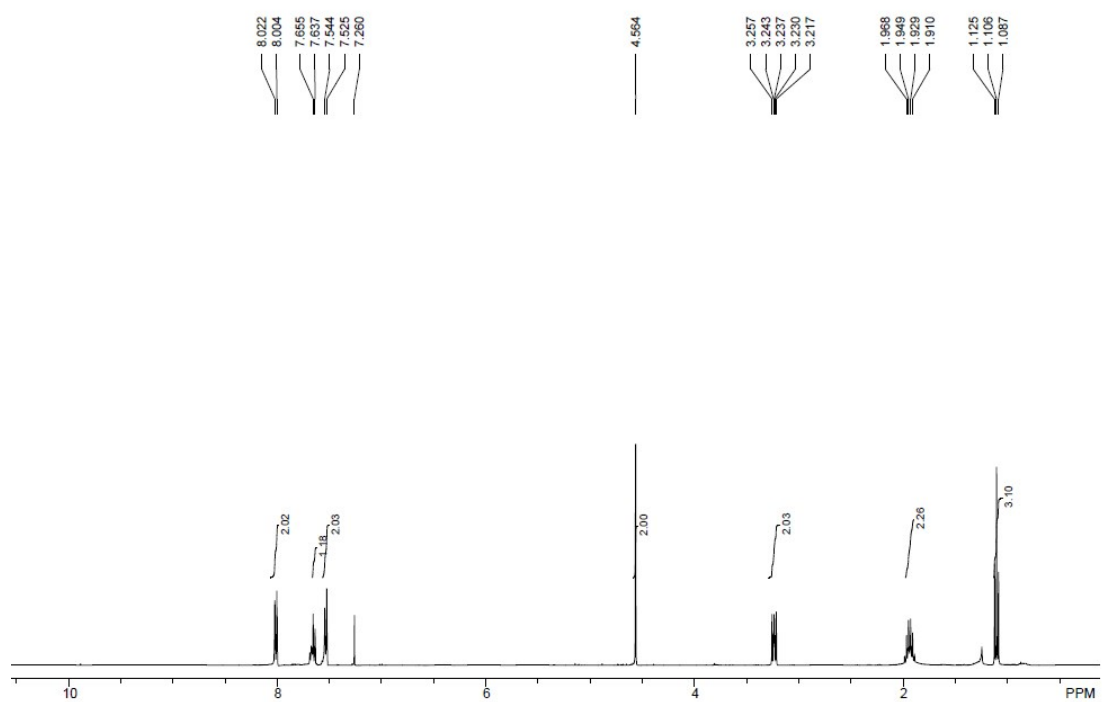

<sup>1</sup>H spectra of 3ap

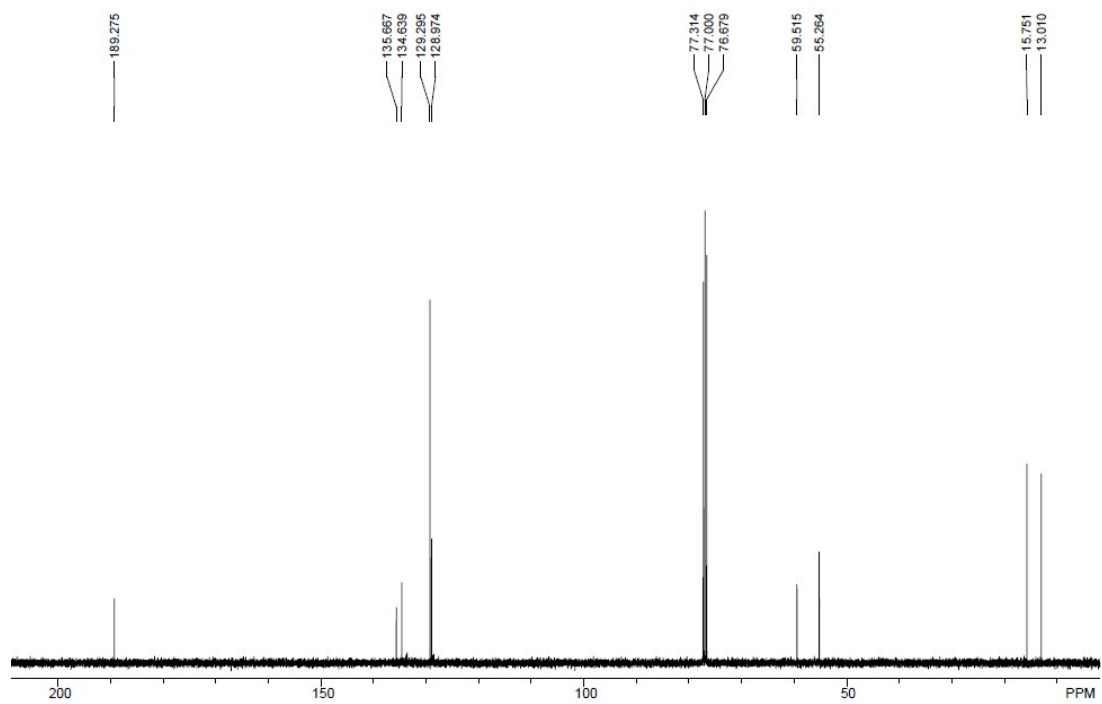

<sup>13</sup>C spectra of 3ap

**9,10-dimethyl-9,10-dihydro-9,10-epidioxyanthracene (5b)**

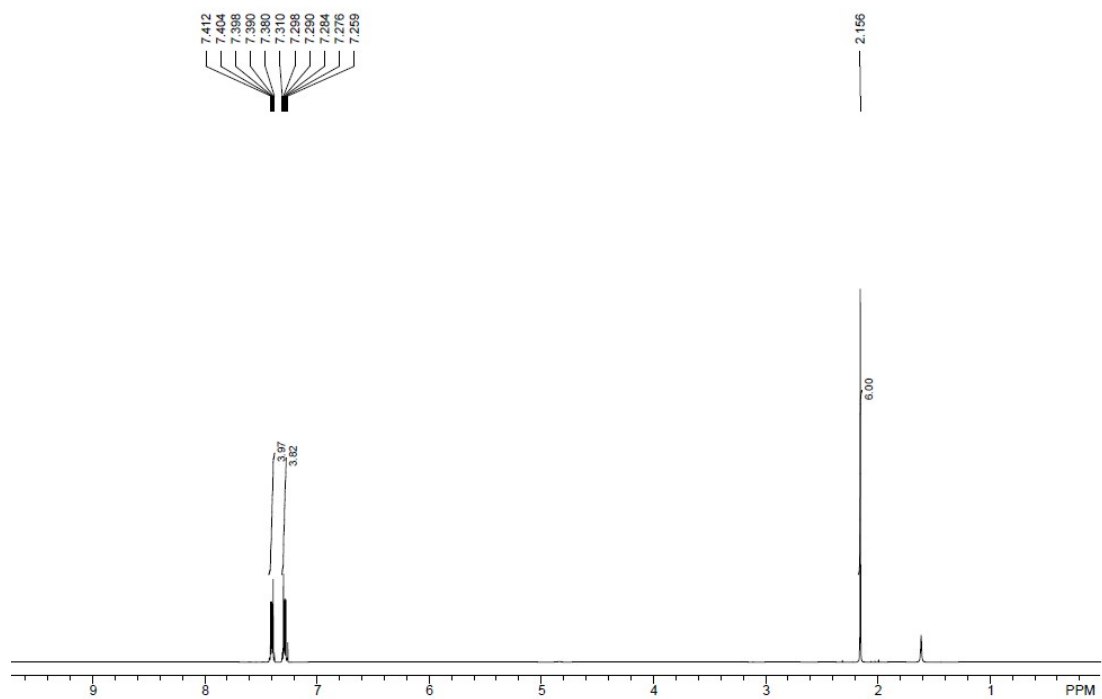

<sup>1</sup>H spectra of **5b**

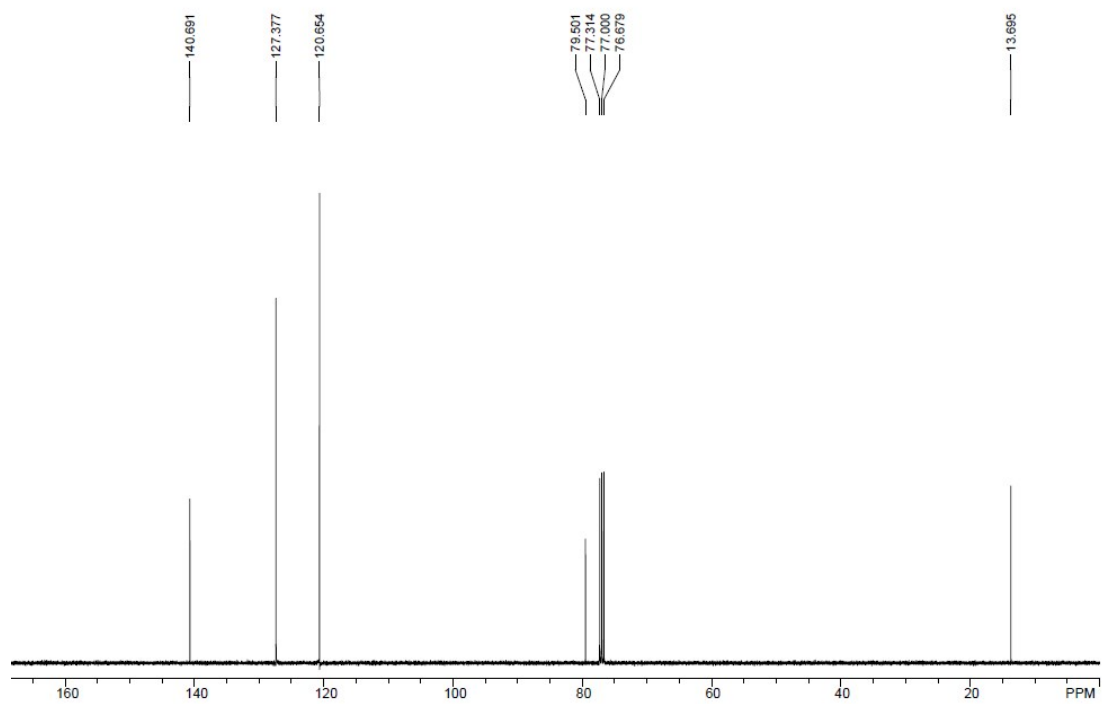

<sup>13</sup>C spectra of **5b**
